# Supplementary material for: Development of Piperazine- and Oxazine-Linked Pyrimidines as p65 Subunit Binders of NF–κB in Human Breast Cancer Cells
Source: MDPI journal article supplement (doi:10.3390/biomedicines11102716), 2023-10-06

| PAGES   | CONTENT                                                            |
|---------|--------------------------------------------------------------------|
| S2-S23  | $^1\text{H}$ and $^{13}\text{C}$ NMR of <b>3(a-l)</b>              |
| S24-S40 | H and $^{13}\text{C}$ NMR of <b>5(a-p)</b>                         |
| S41-S43 | IC <sub>50</sub> of <b>3(a-l)</b> against MCF-7                    |
| S44-S48 | IC <sub>50</sub> of <b>5(a-p)</b> against MCF-7                    |
| S49     | IC <sub>50</sub> of <b>3a</b> against MDA-MB-231, BT-549, SUM159PT |
| S50     | IC <sub>50</sub> of <b>5b</b> against MDA-MB-231, BT-549, SUM159PT |
| S51     | Original blots of western blot analysis                            |

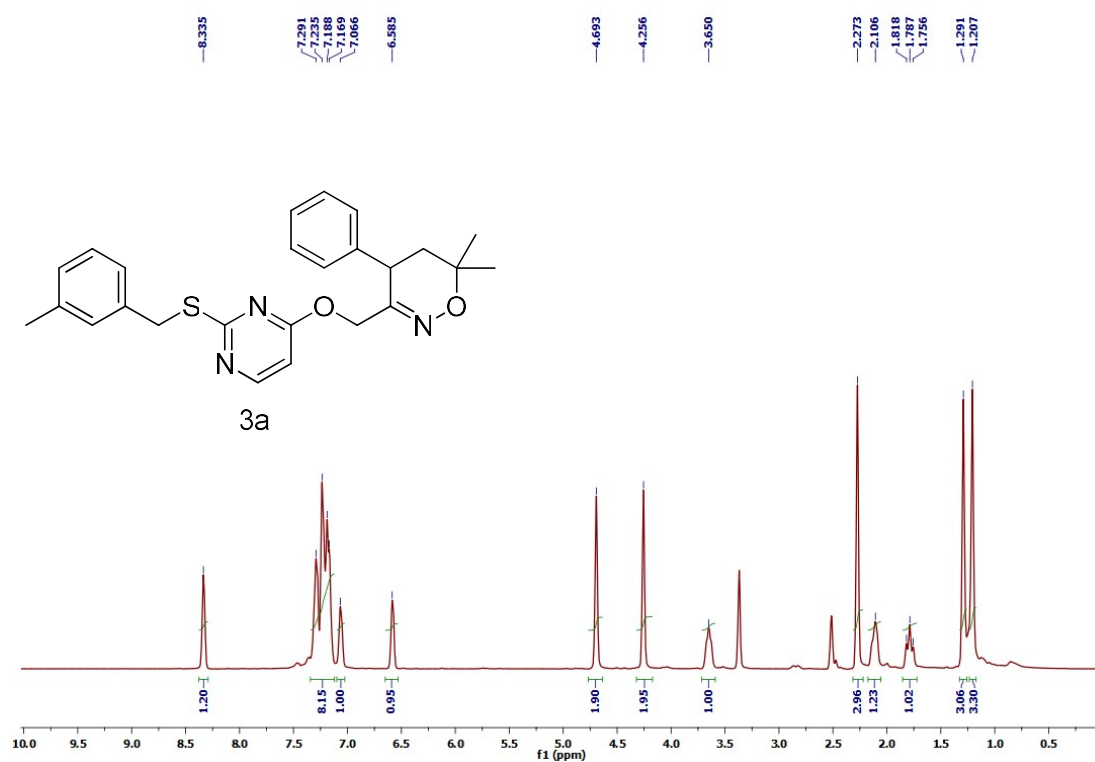

$^1\text{H}$  NMR OF **3a**

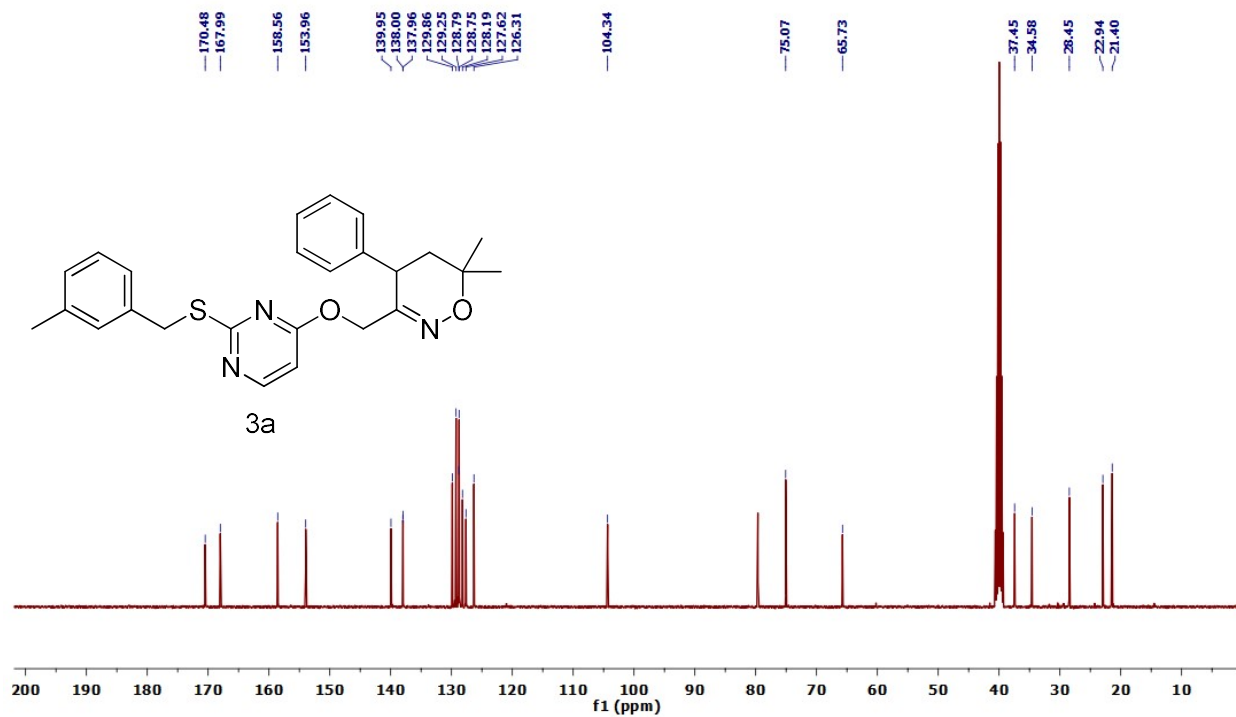

<sup>13</sup>C NMR OF 3a

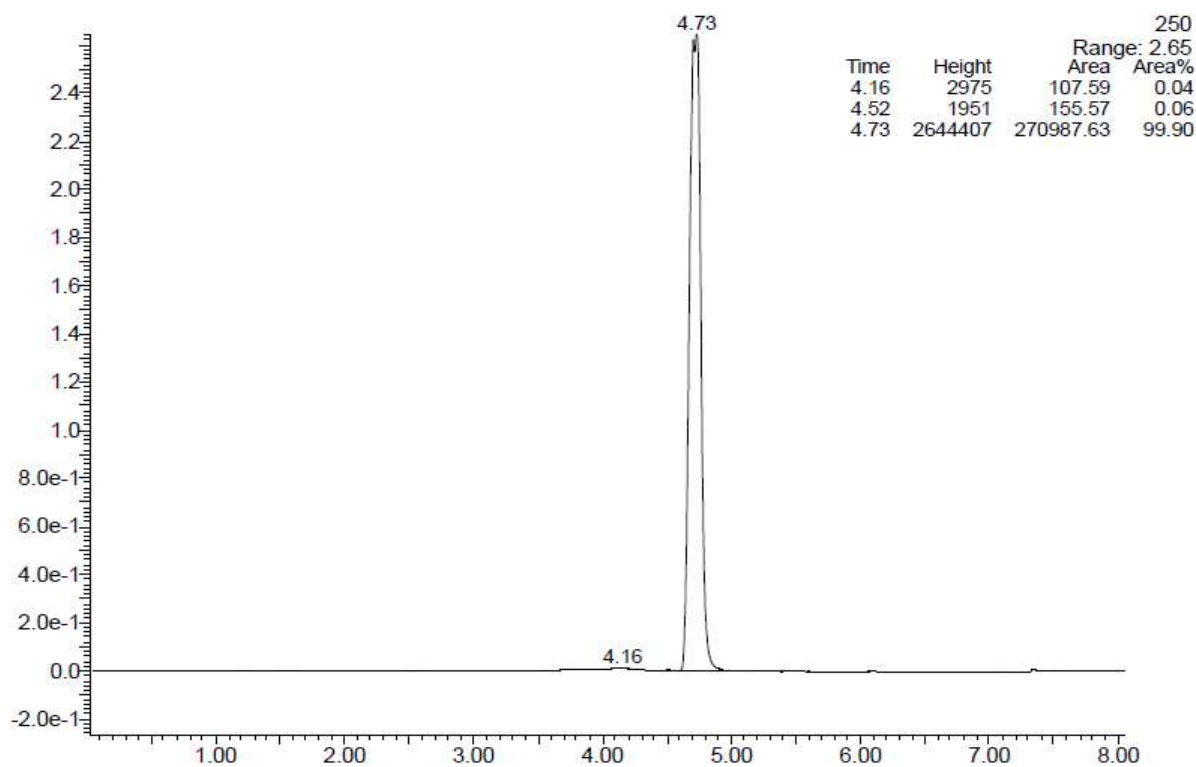

Liquid chromatogram of 3a

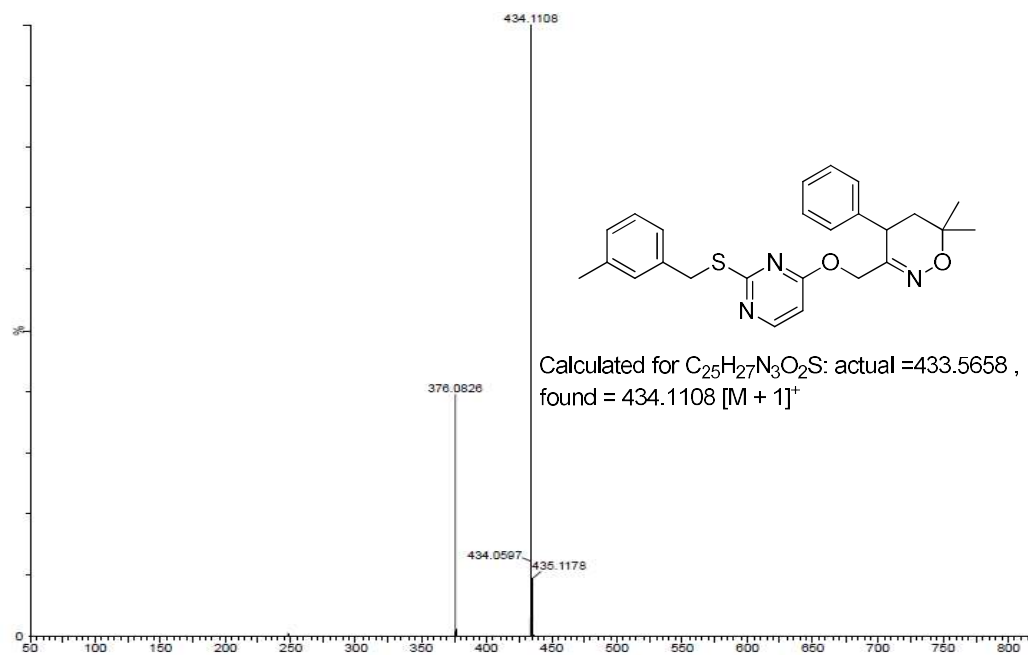

Mass spectra of 3a

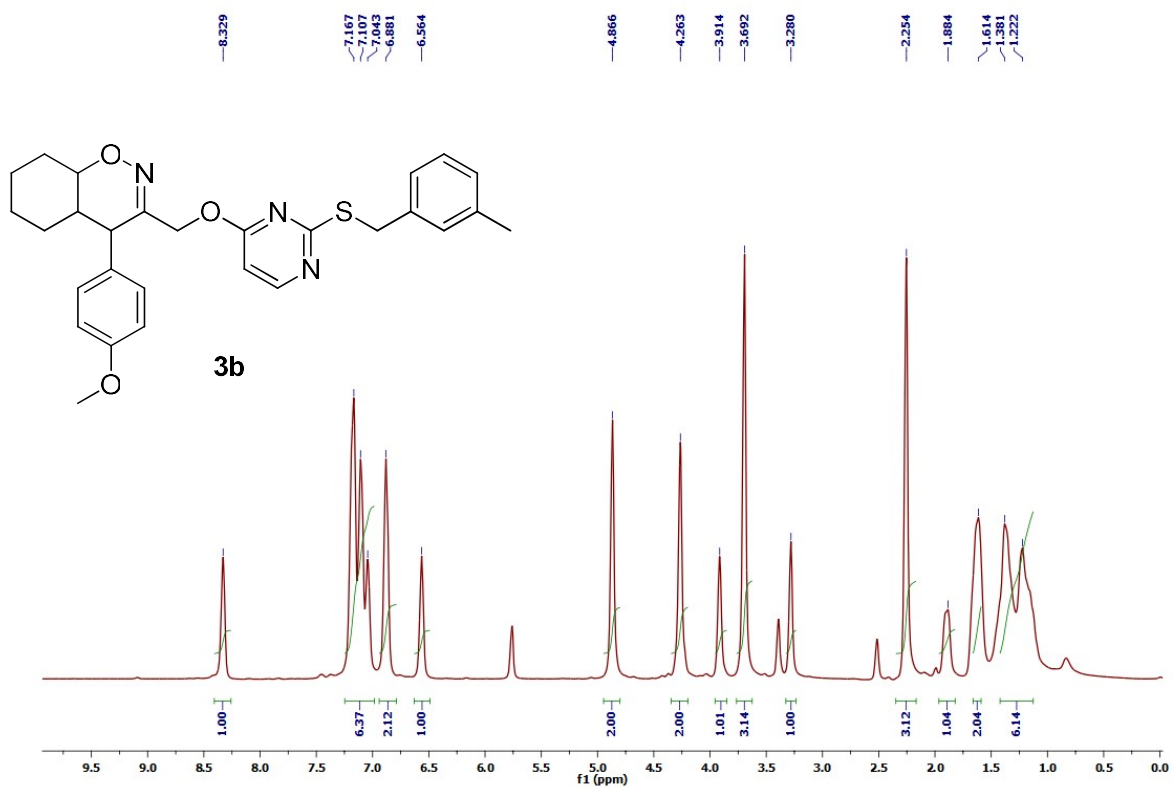

$^1H$  NMR OF 3b

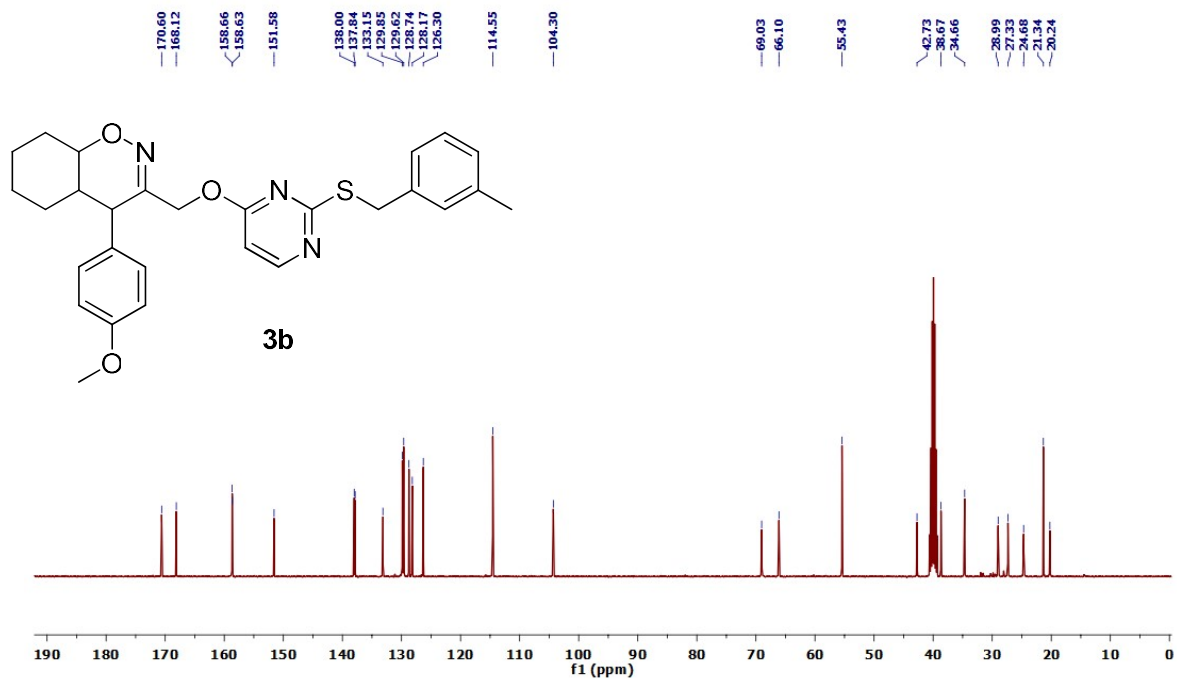

<sup>13</sup>C NMR OF **3b**

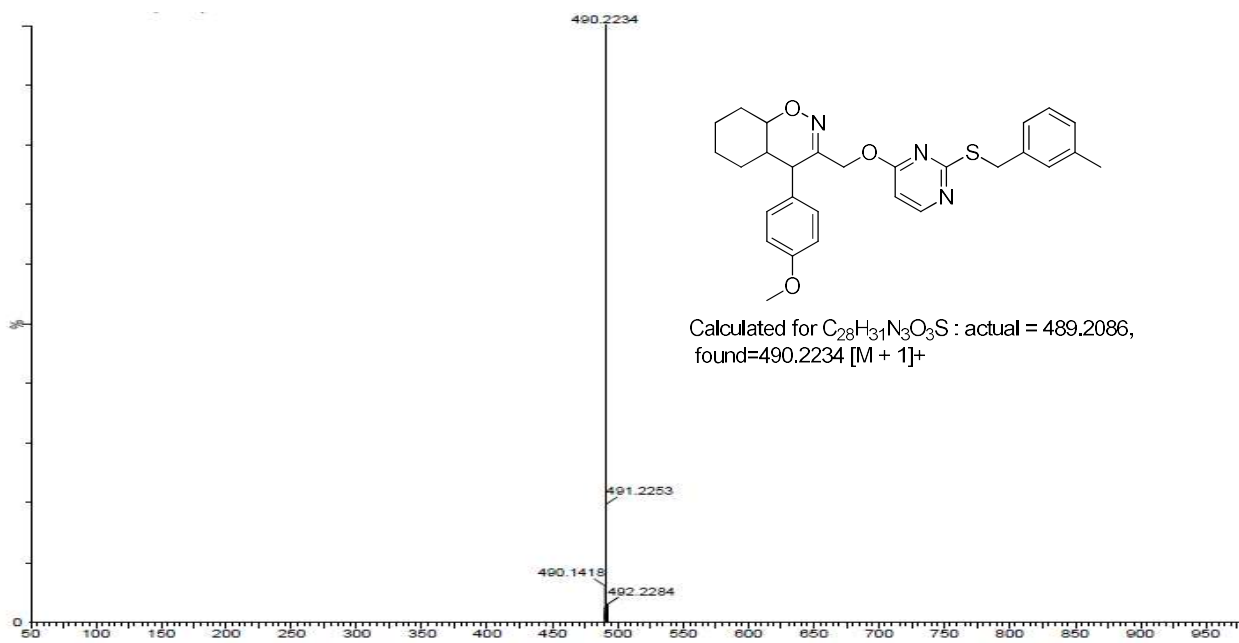

Mass spectra of **3b**

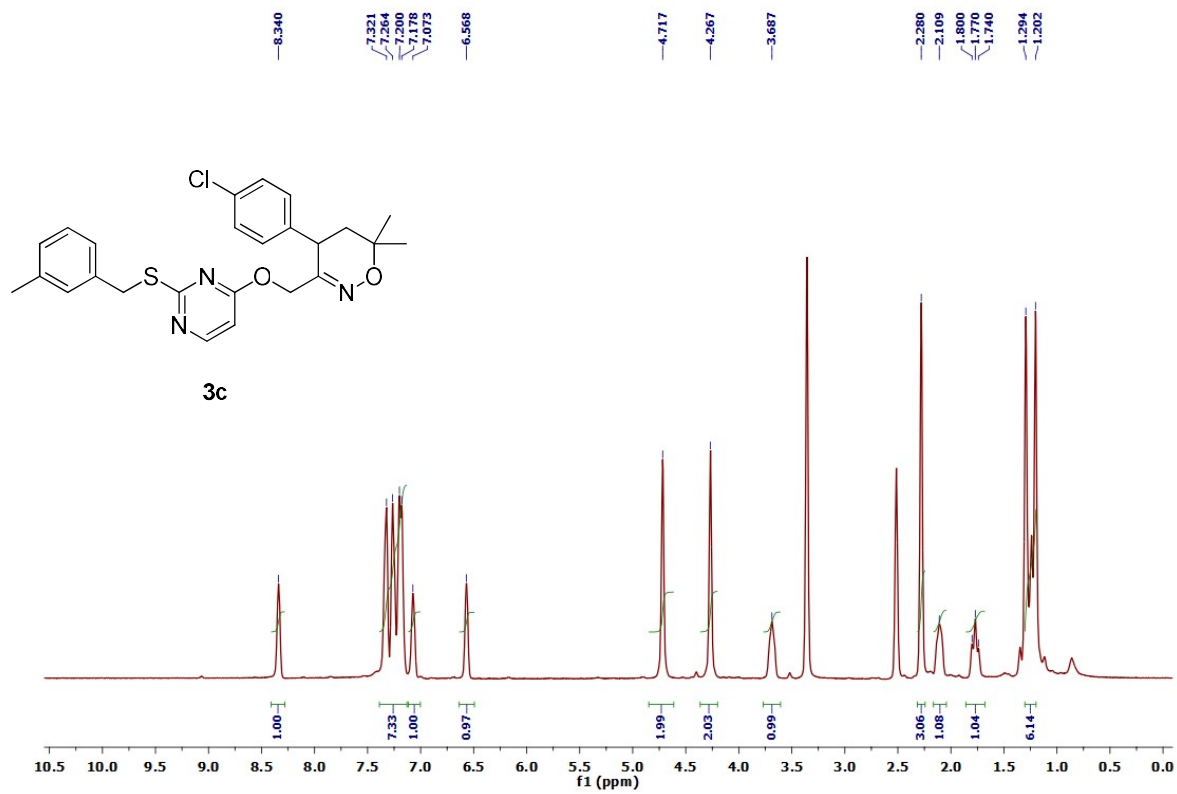

$^1\text{H}$  NMR OF **3c**

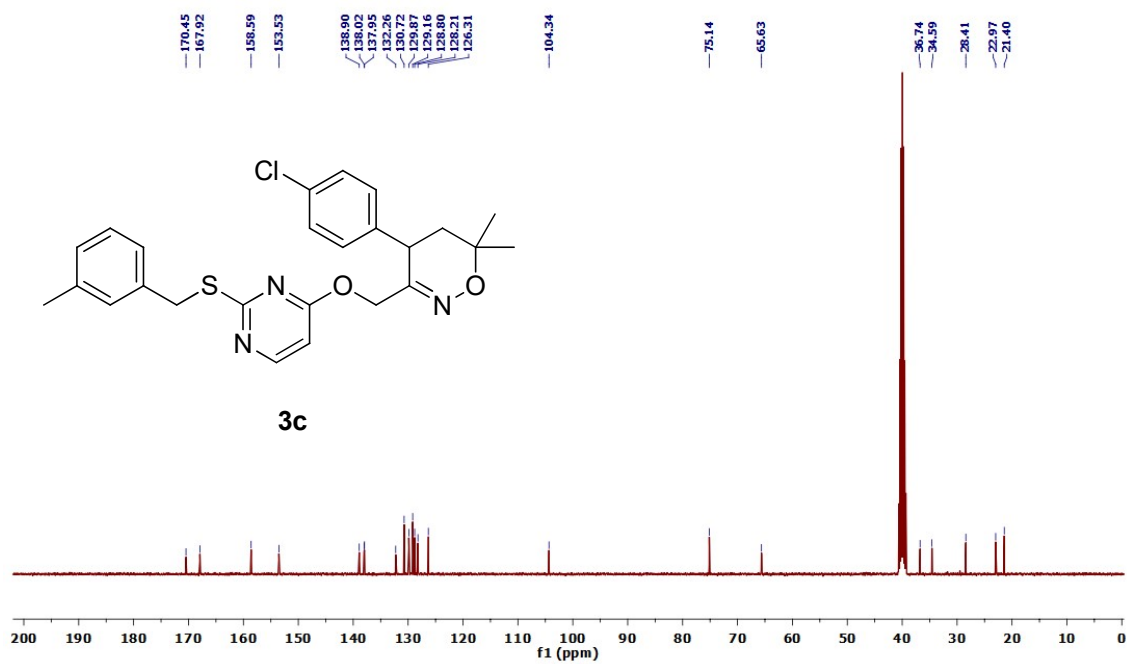

$^{13}\text{C}$  NMR OF **3c**

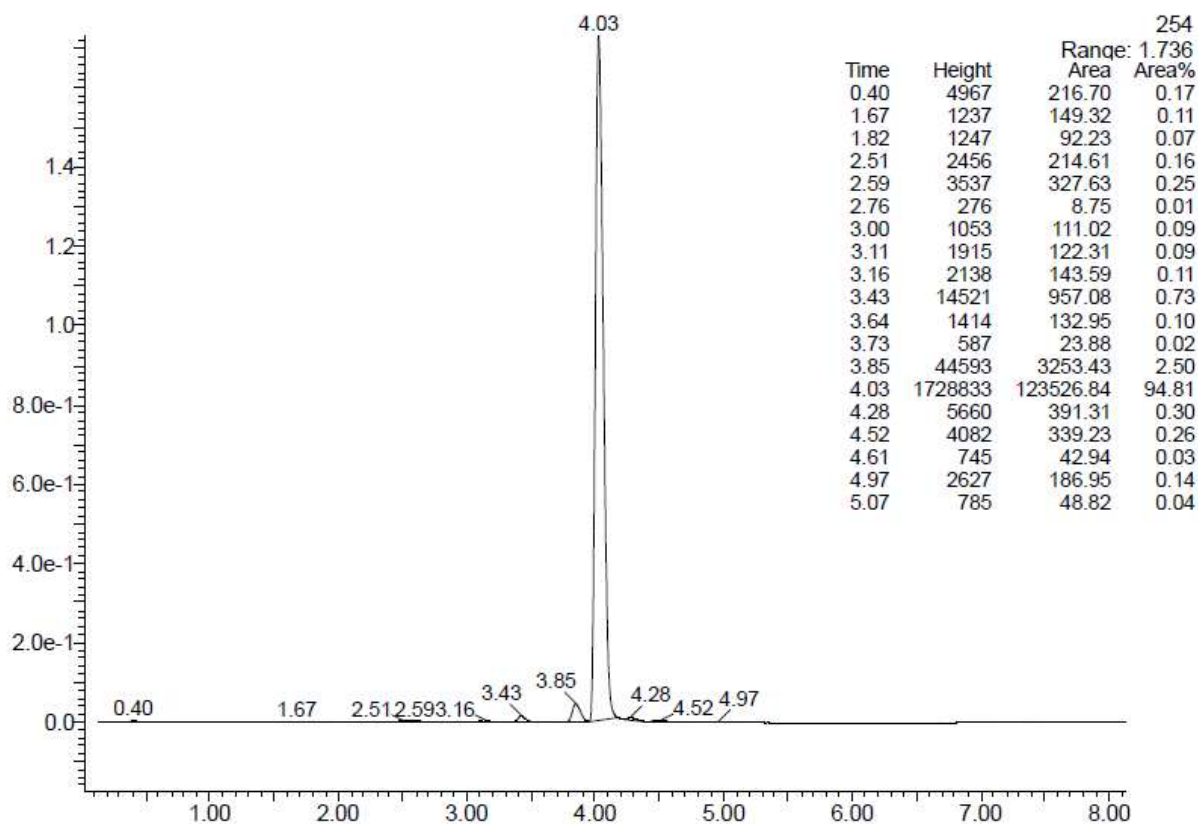

Liquid chromatogram of TRX-03(3c)

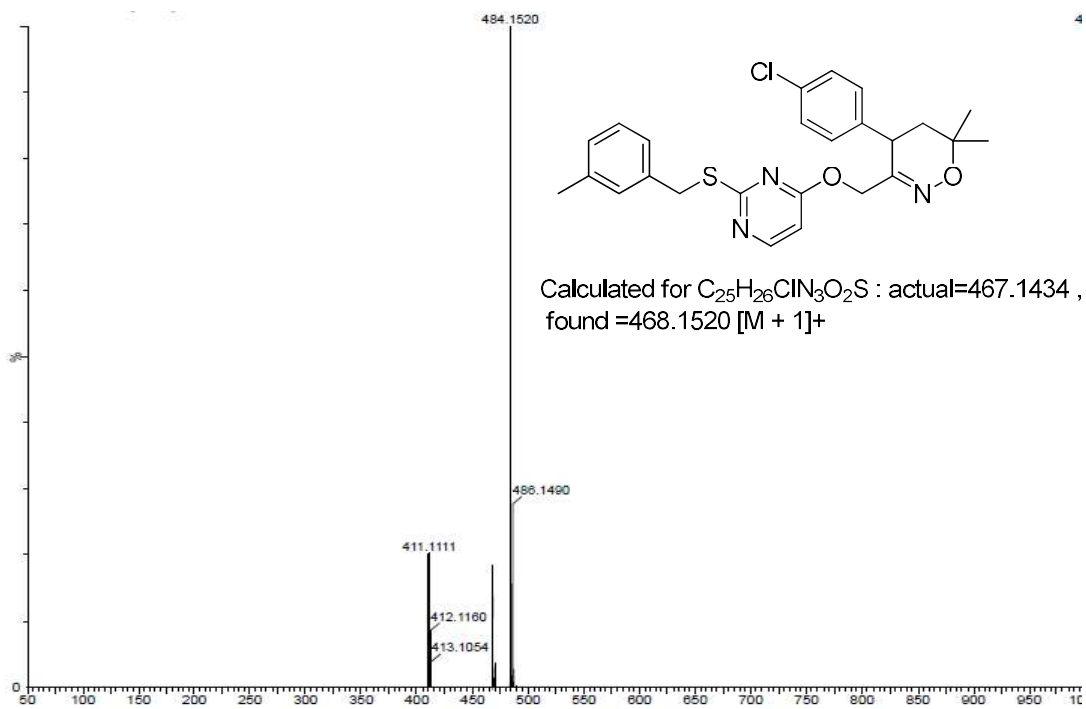

Mass spectra of 3c

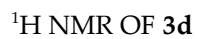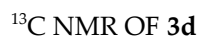

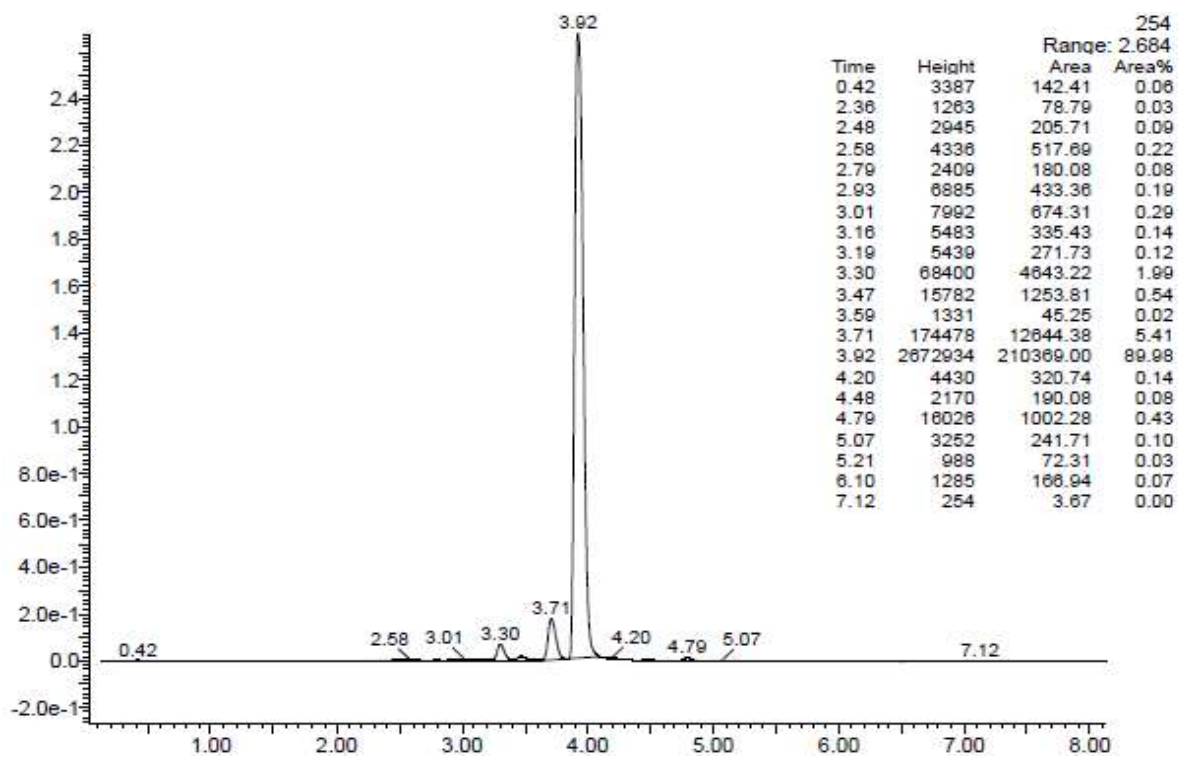

Liquid chromatogram of 3d

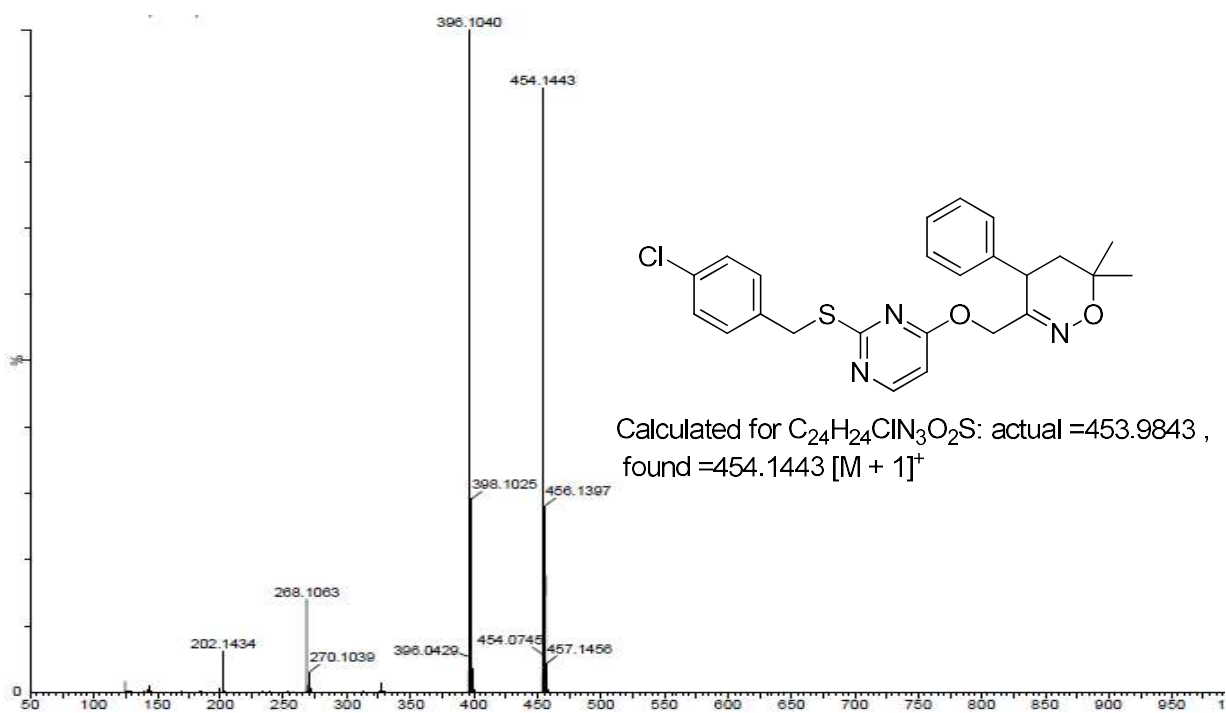

Mass spectra of 3d

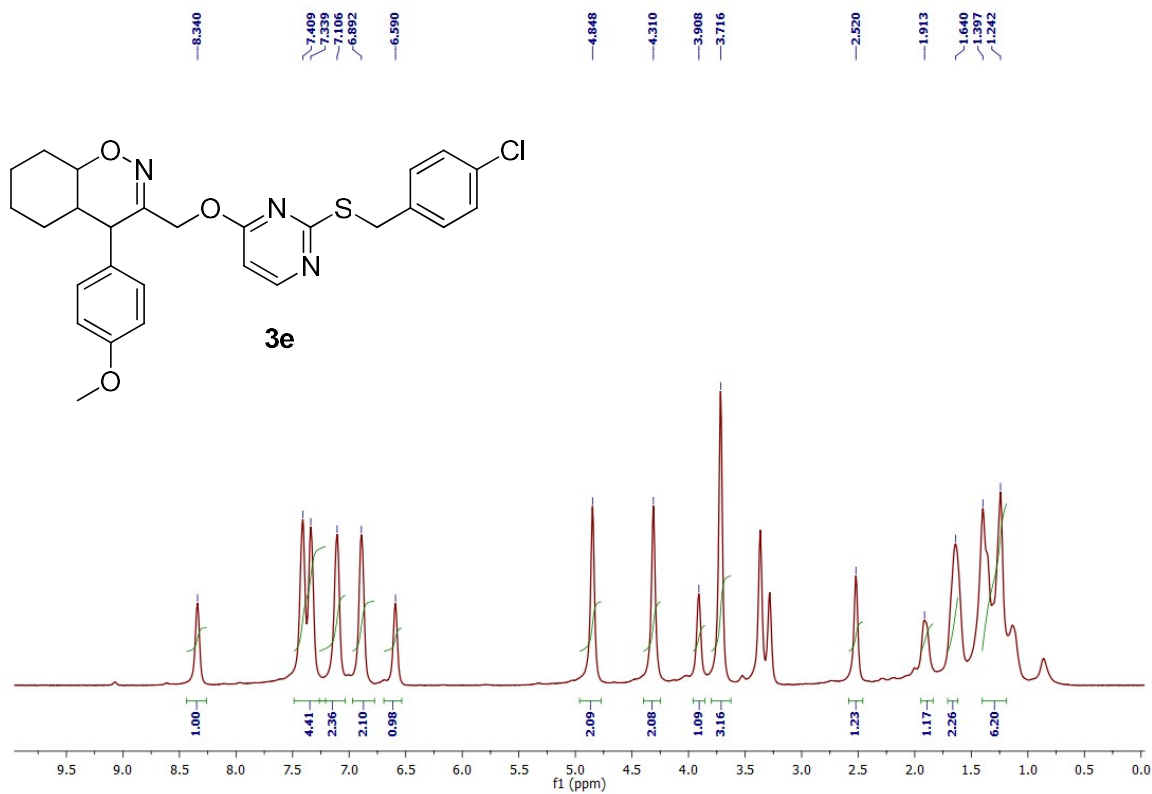

$^1\text{H}$  NMR OF **3e**

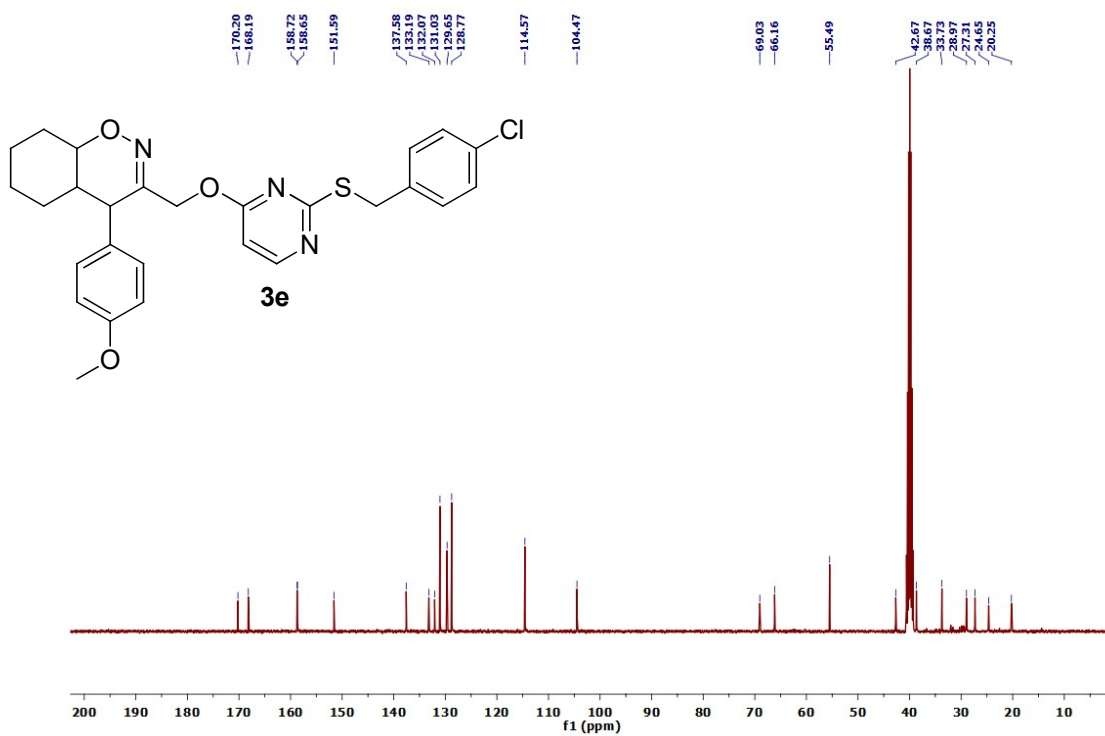

$^{13}\text{C}$  NMR OF **3e**

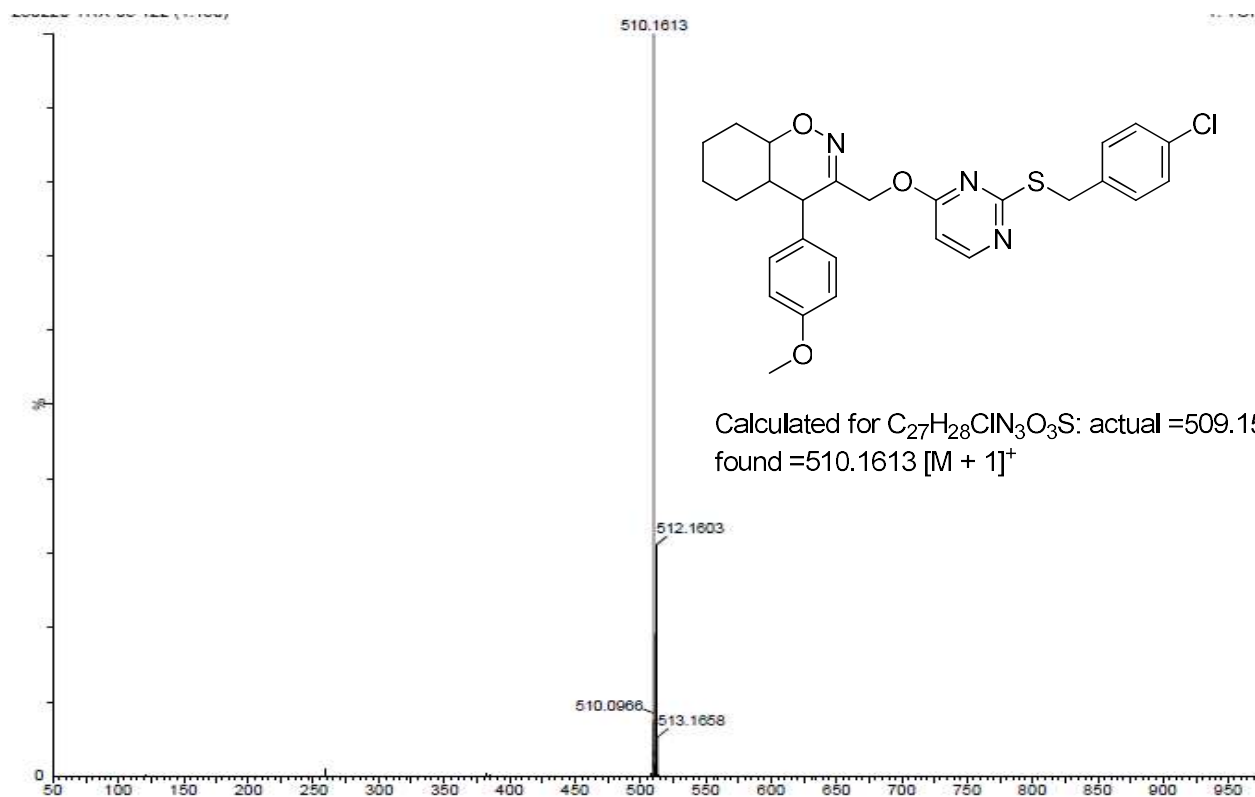

Mass spectra of **3e**

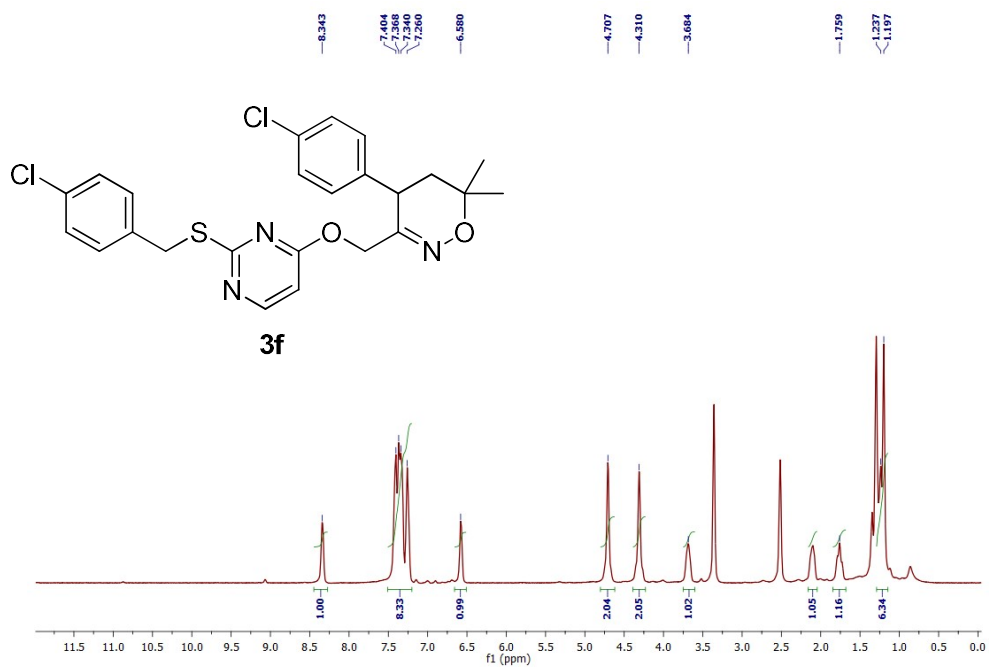

$^1H$  NMR OF **3f**

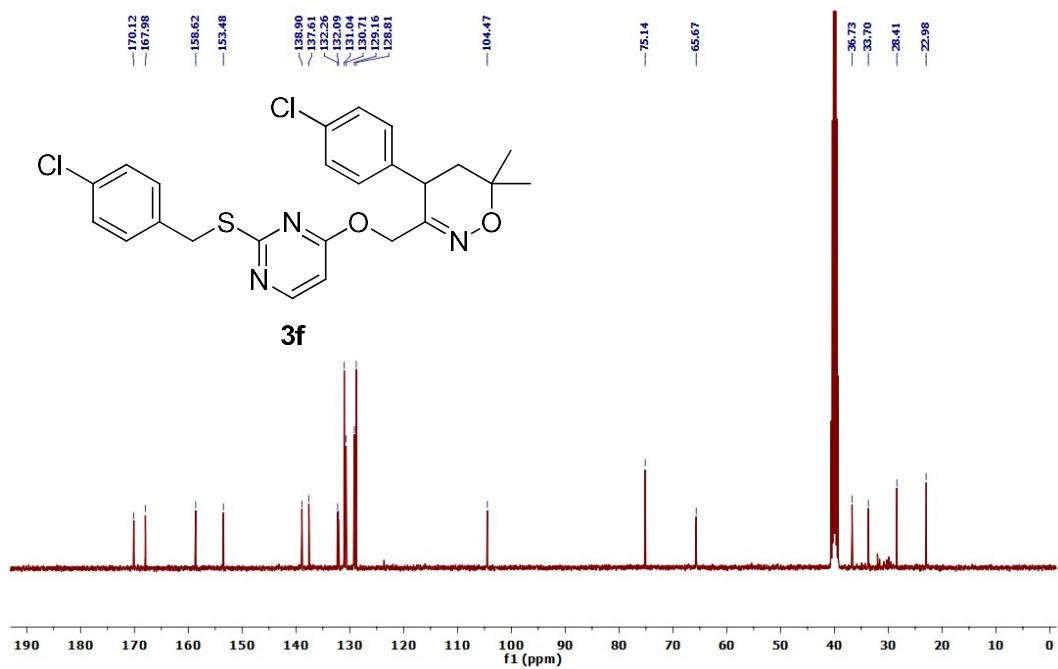

$^{13}\text{C}$  NMR OF **3f**

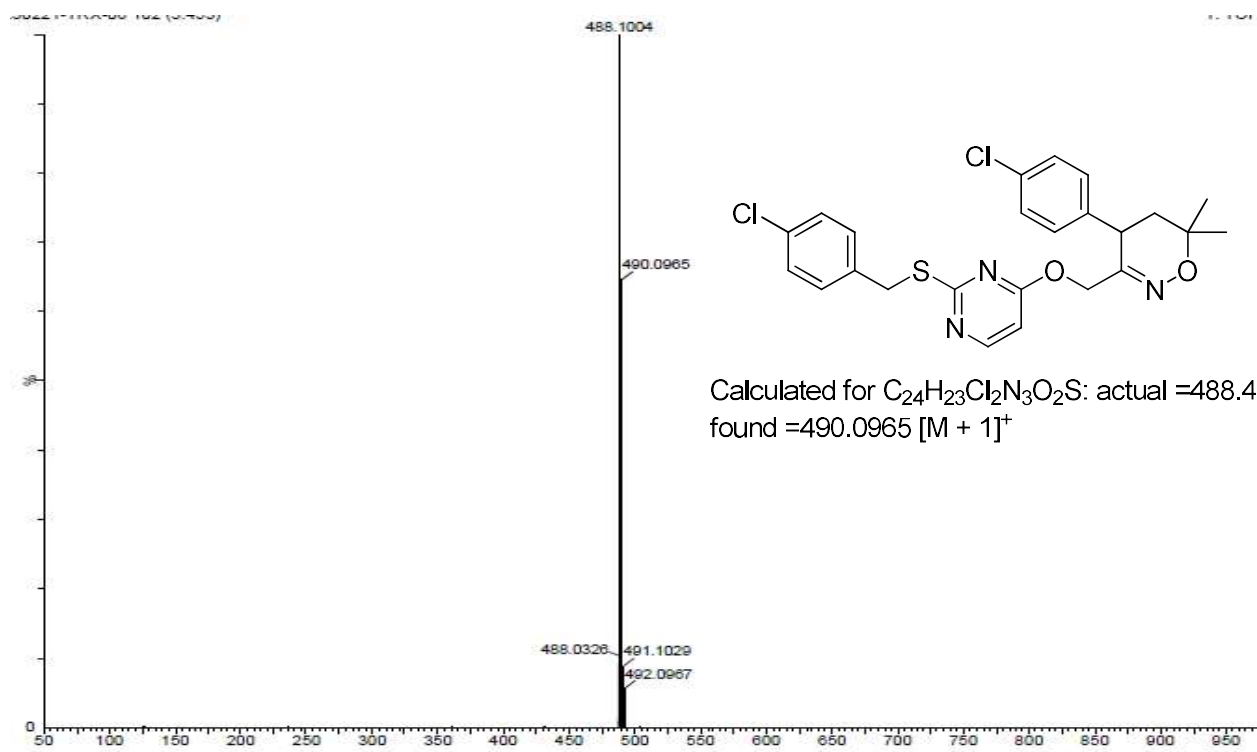

Mass spectra of TRX-05 (**3f**)

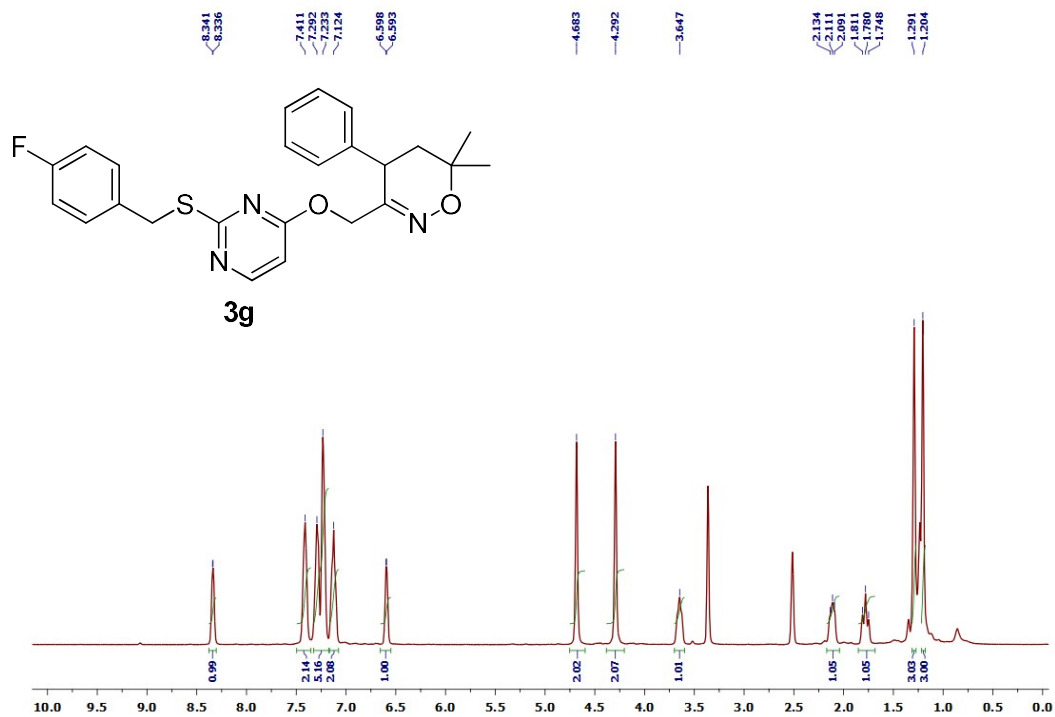

$^1\text{H}$  NMR OF **3g**

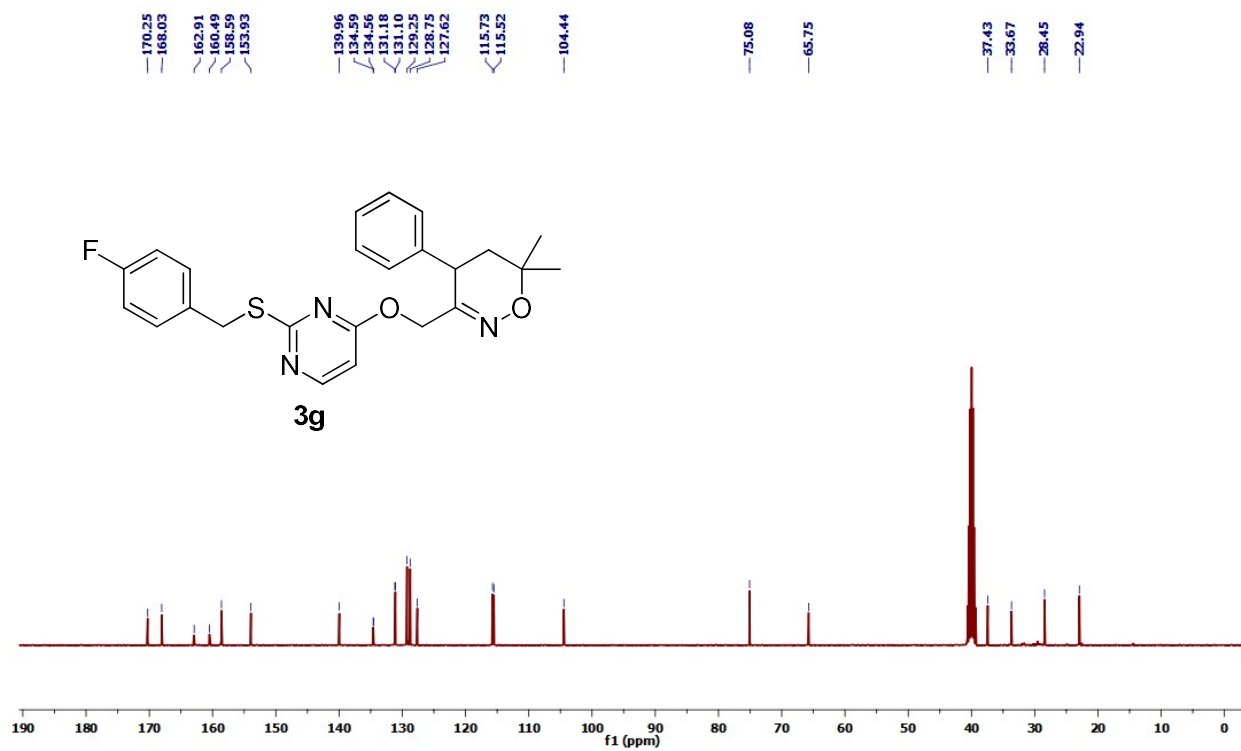

$^{13}\text{C}$  NMR OF **3g**

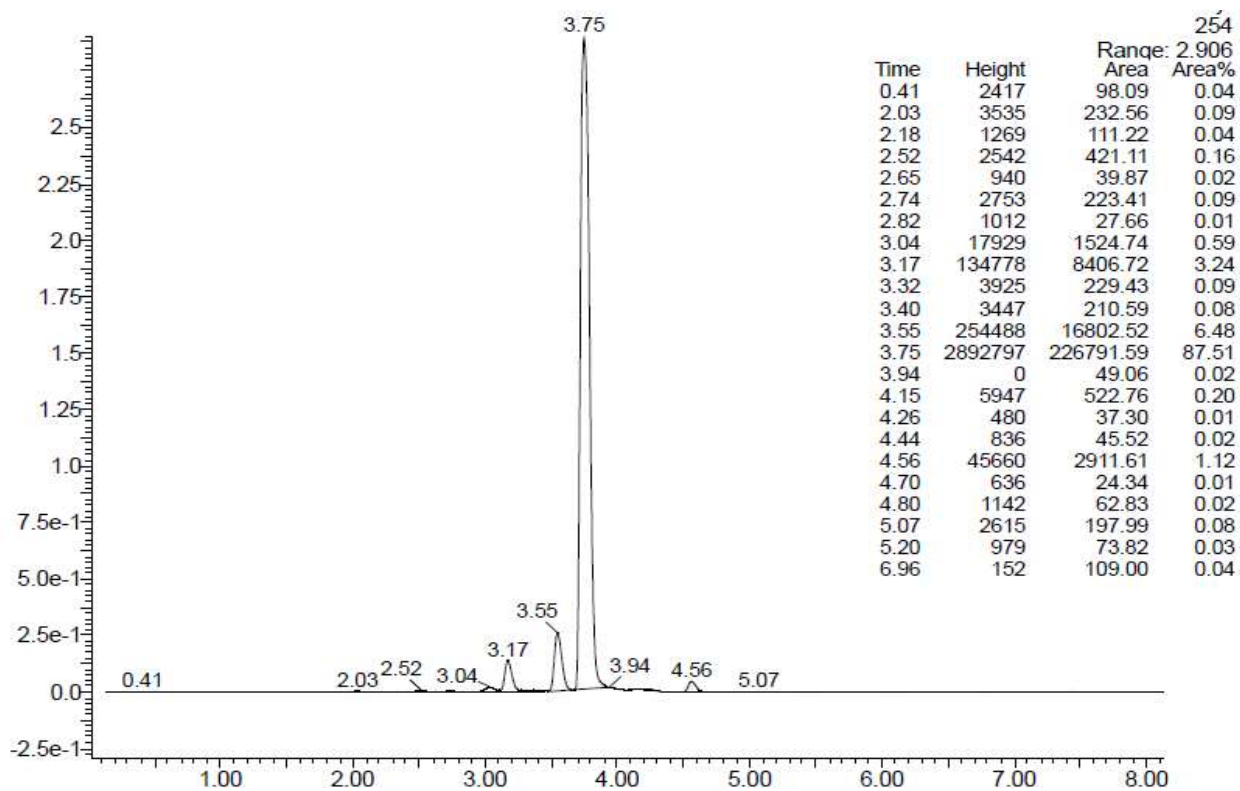

Liquid chromatogram of **3g**

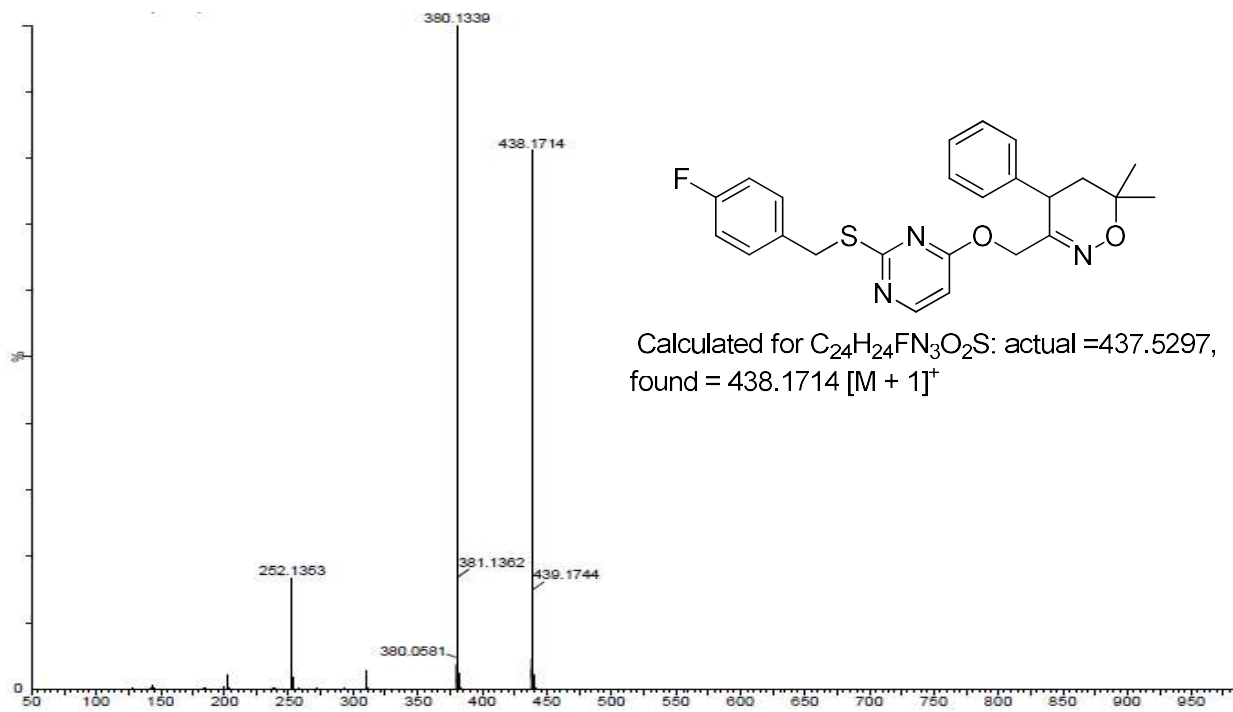

Mass spectra of **3g**

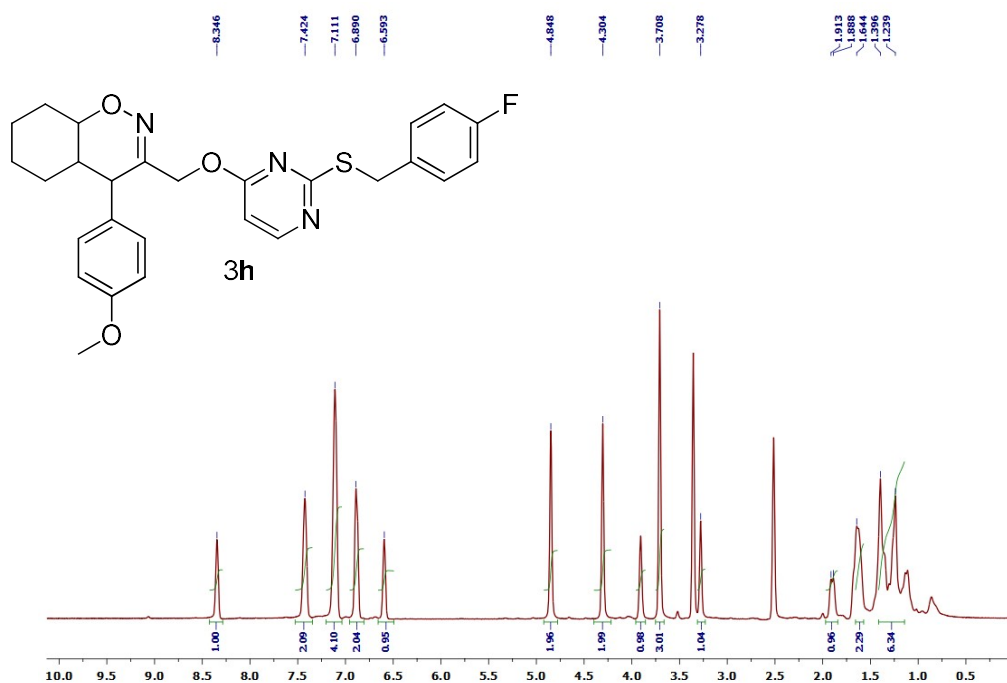

$^1\text{H}$  NMR OF **3h**

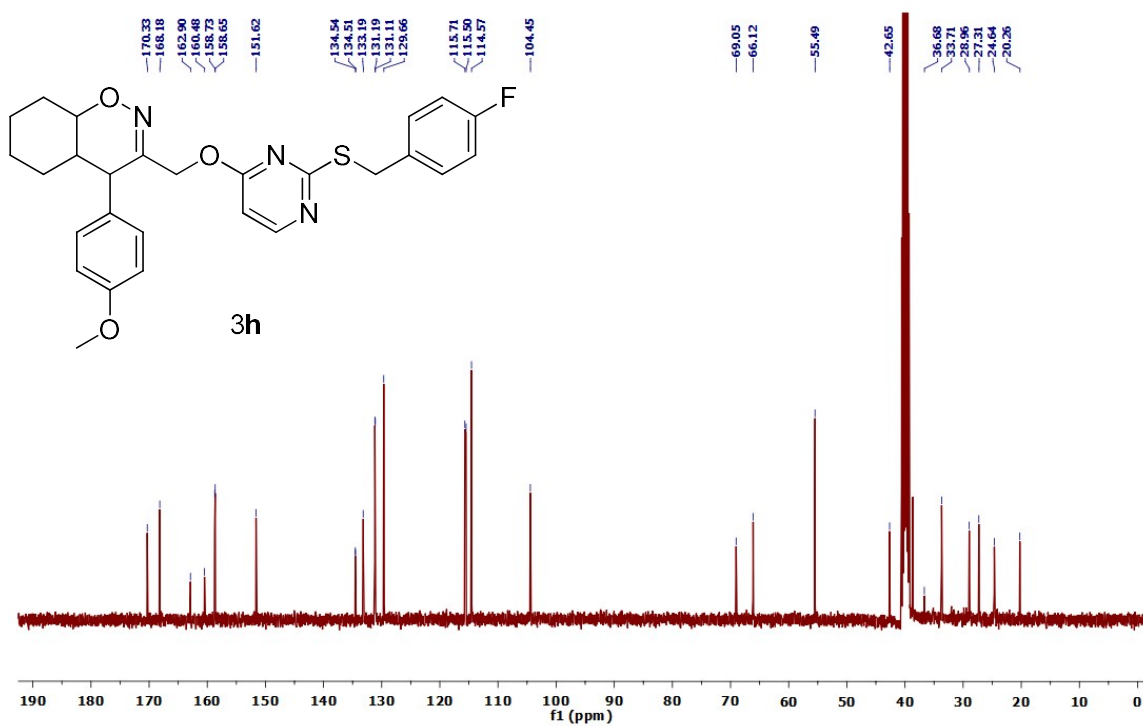

$^{13}\text{C}$  NMR OF **3h**

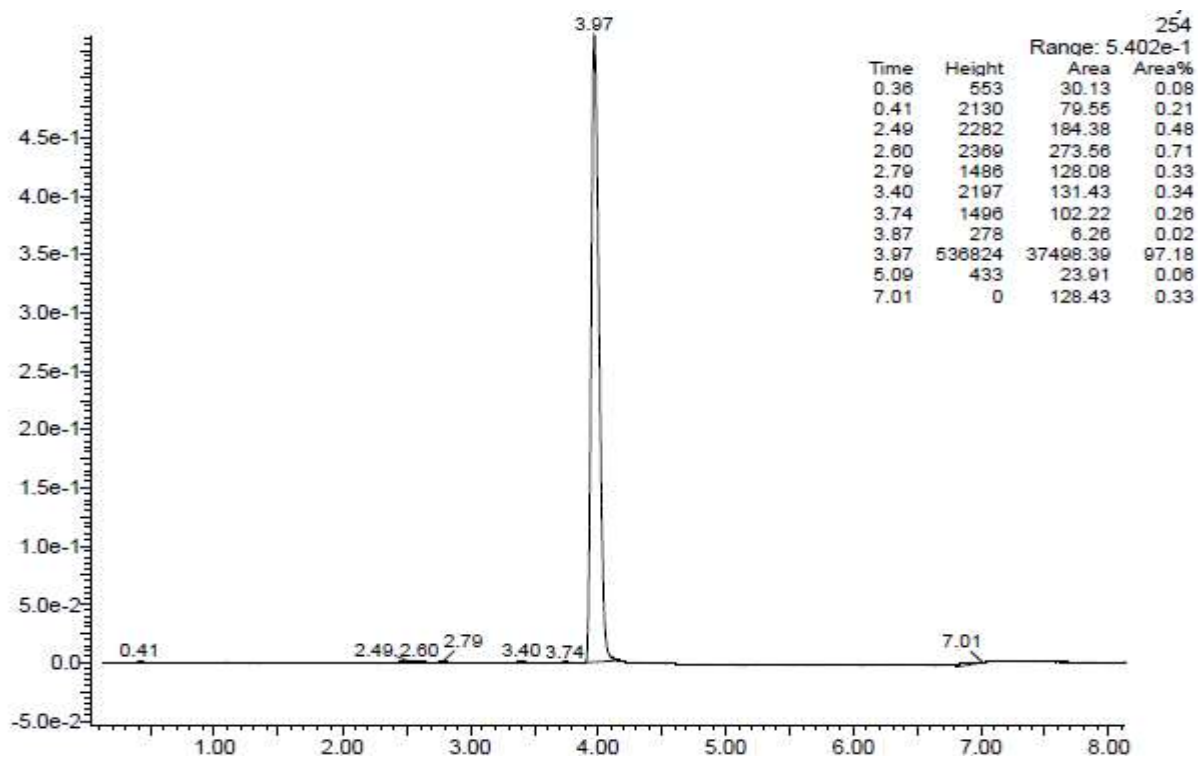

Liquid chromatogram of (3h)

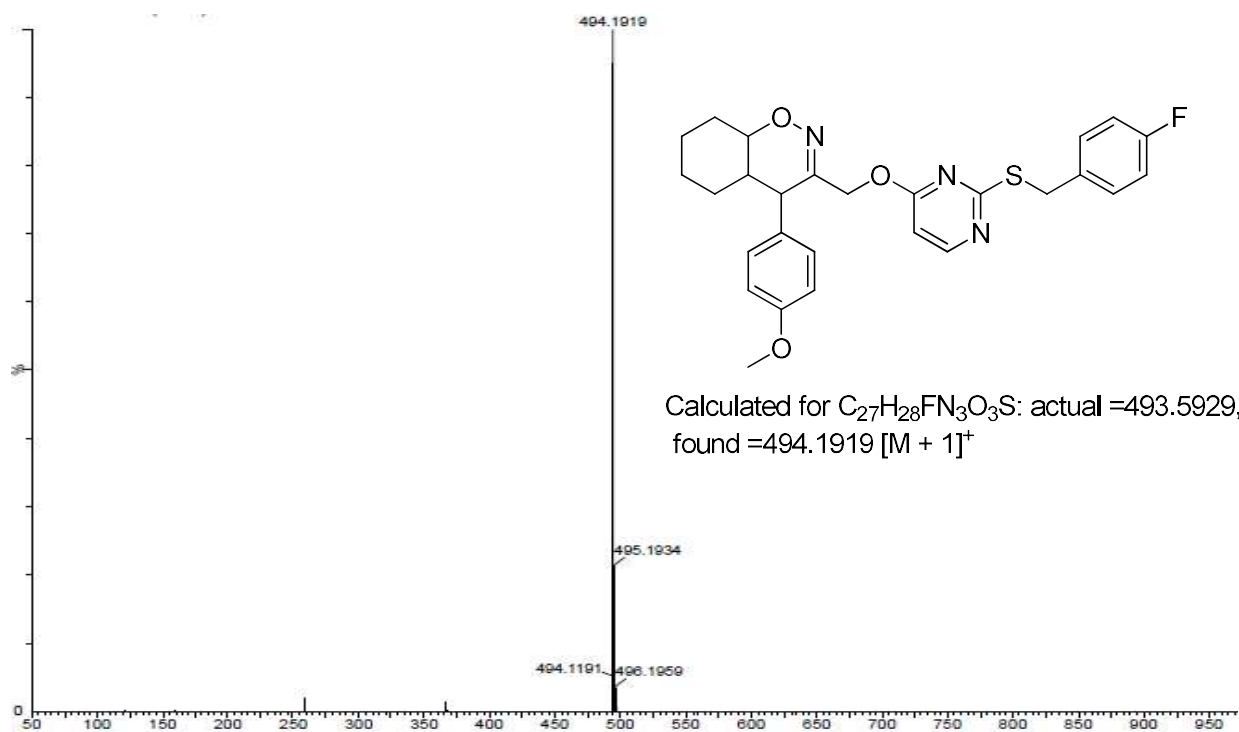

Mass spectra of 3h

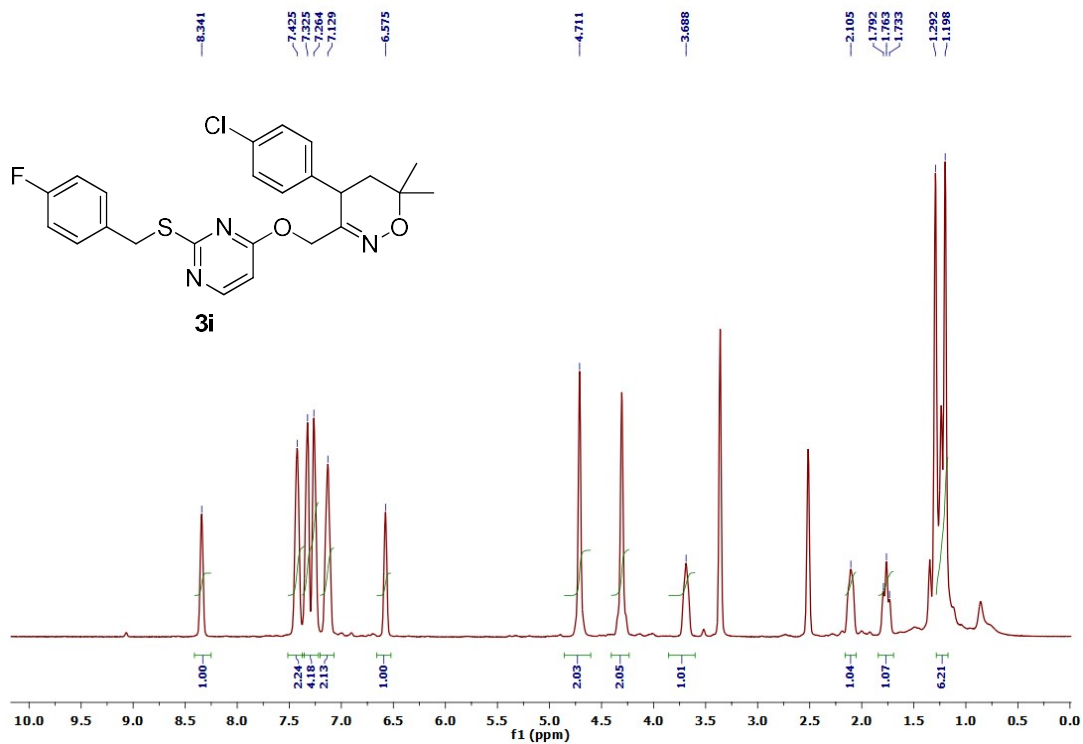

$^1\text{H}$  NMR OF **3i**

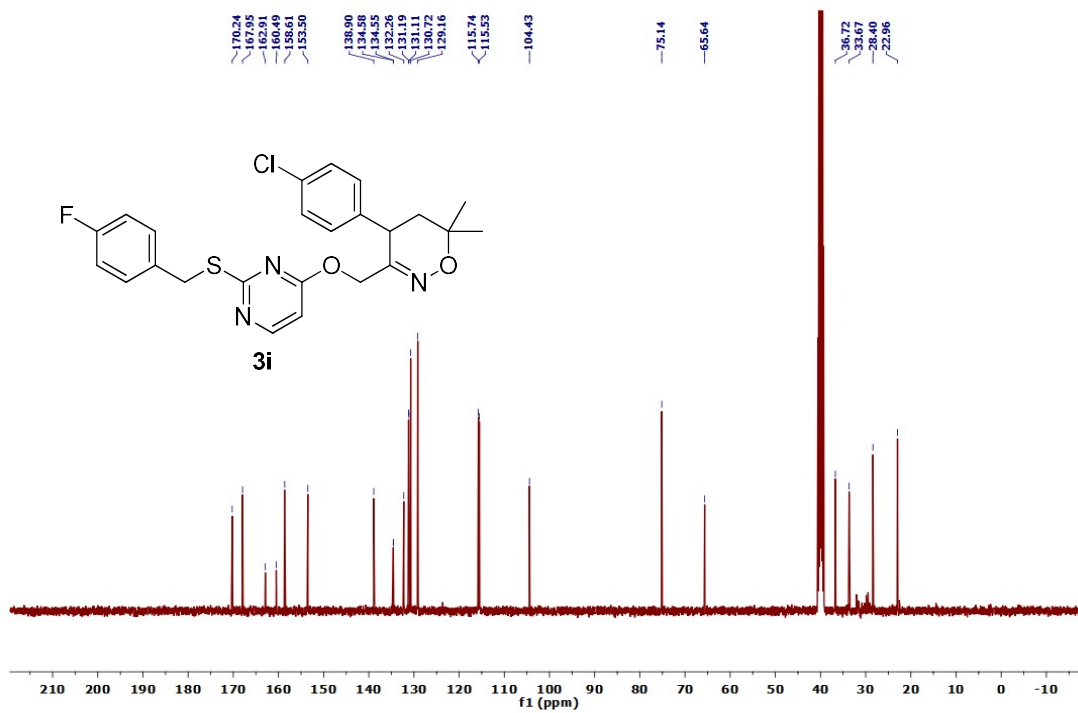

$^{13}\text{C}$  NMR OF **3i**

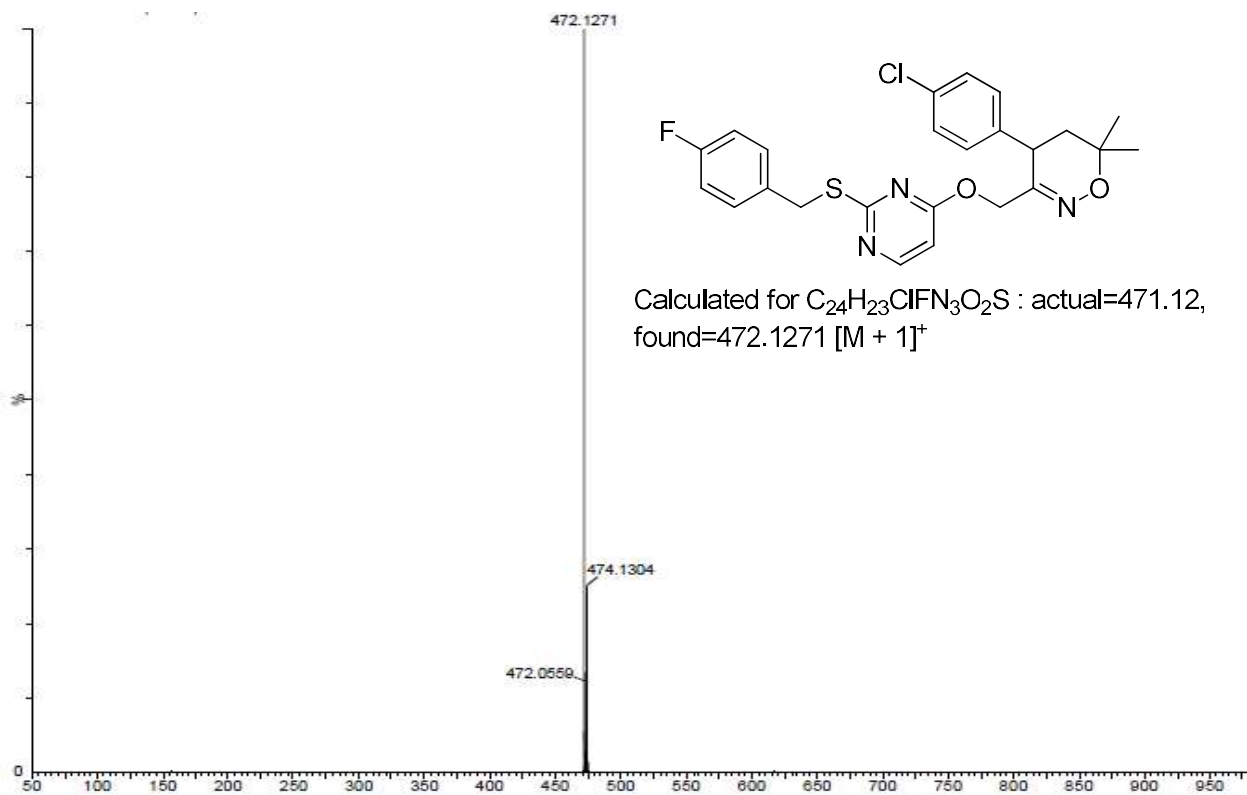

Mass spectra of 3i

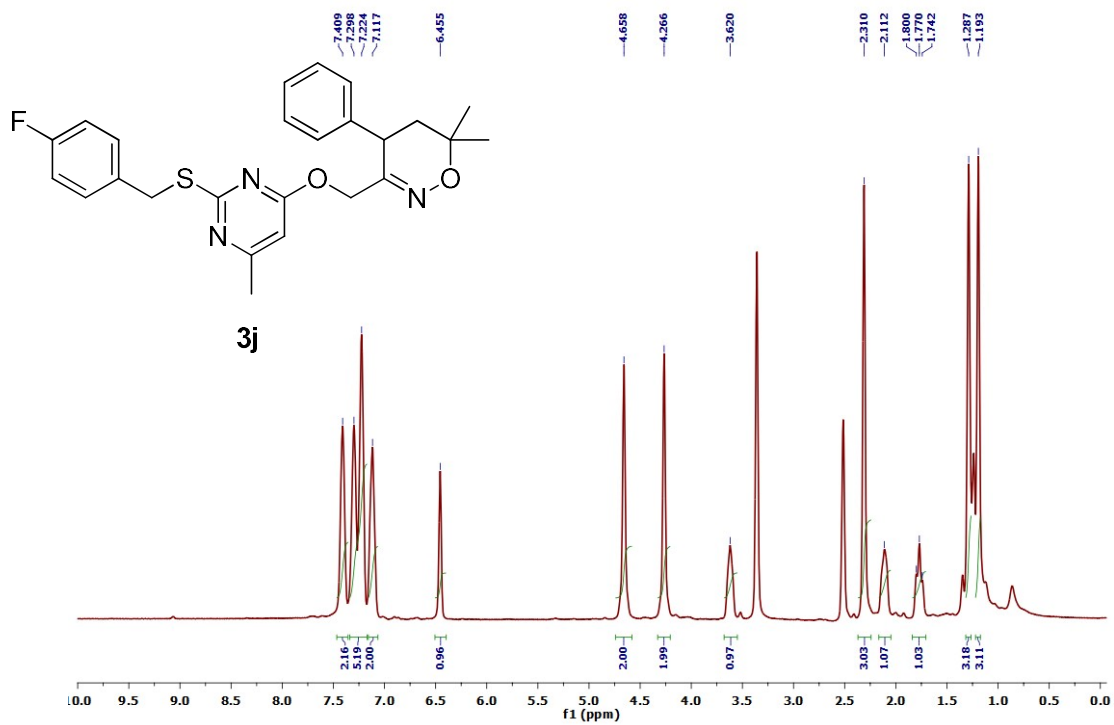

$^1H$  NMR OF 3j

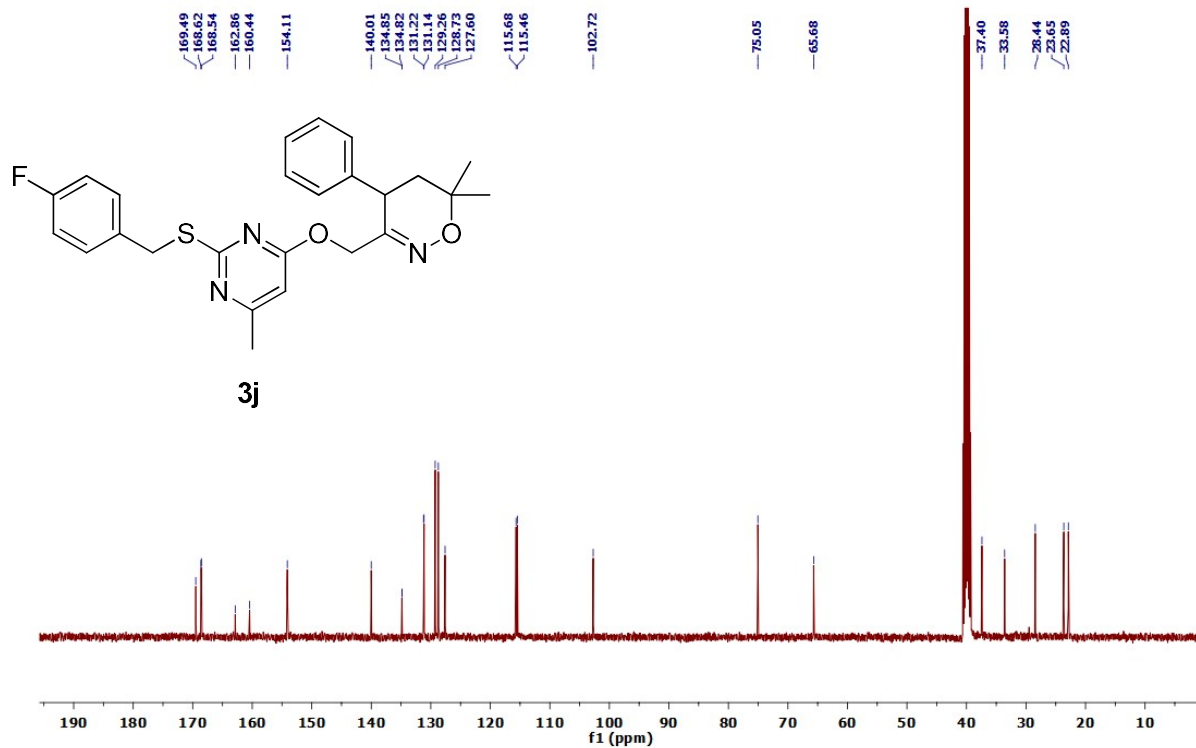

$^{13}\text{C}$  NMR OF **3j**

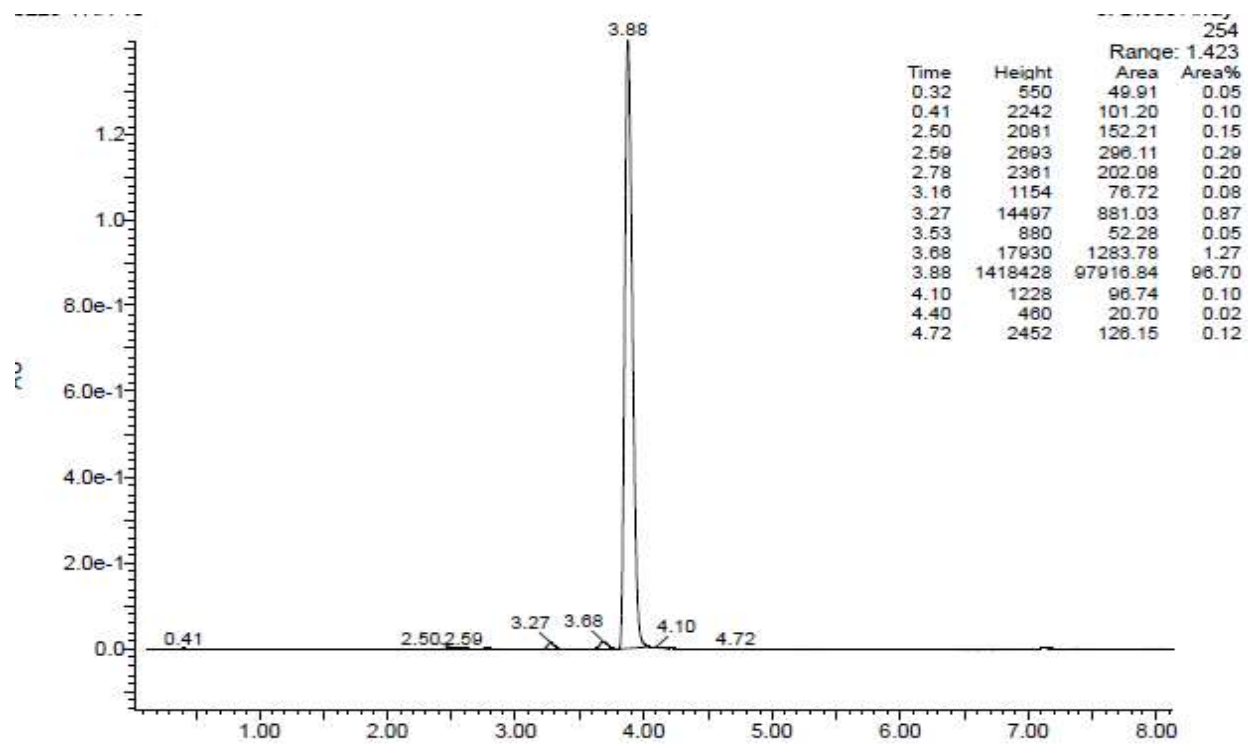

Liquid chromatogram of **3j**

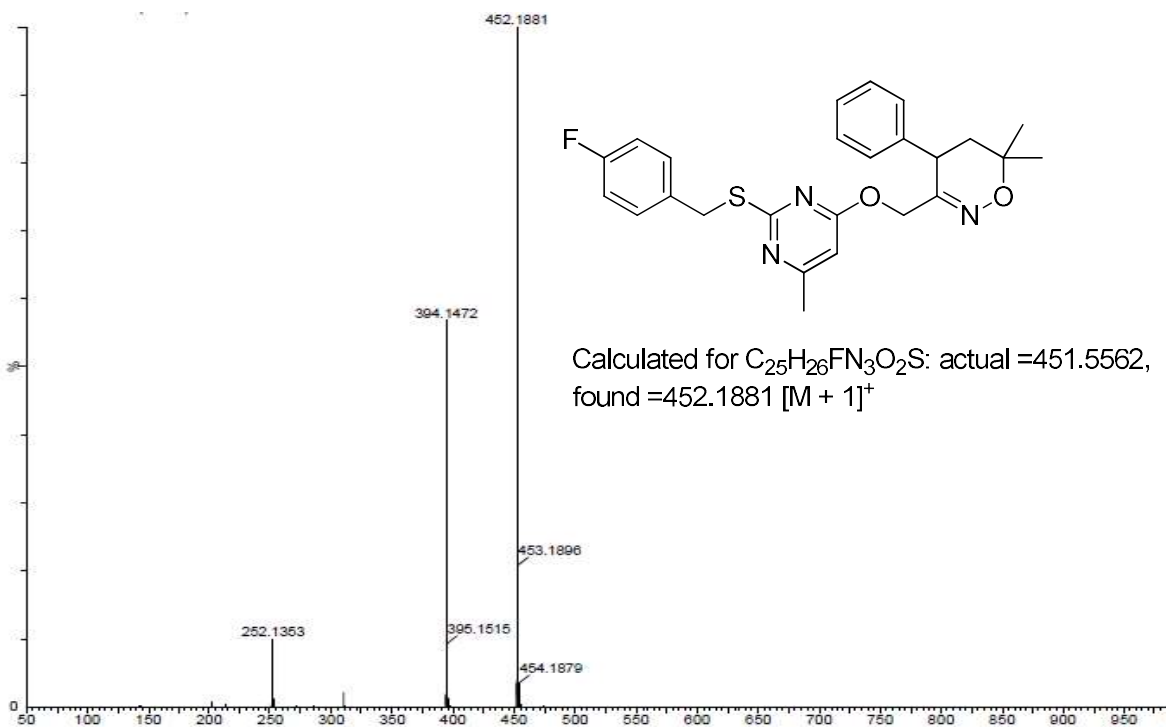

Mass spectra of **3j**

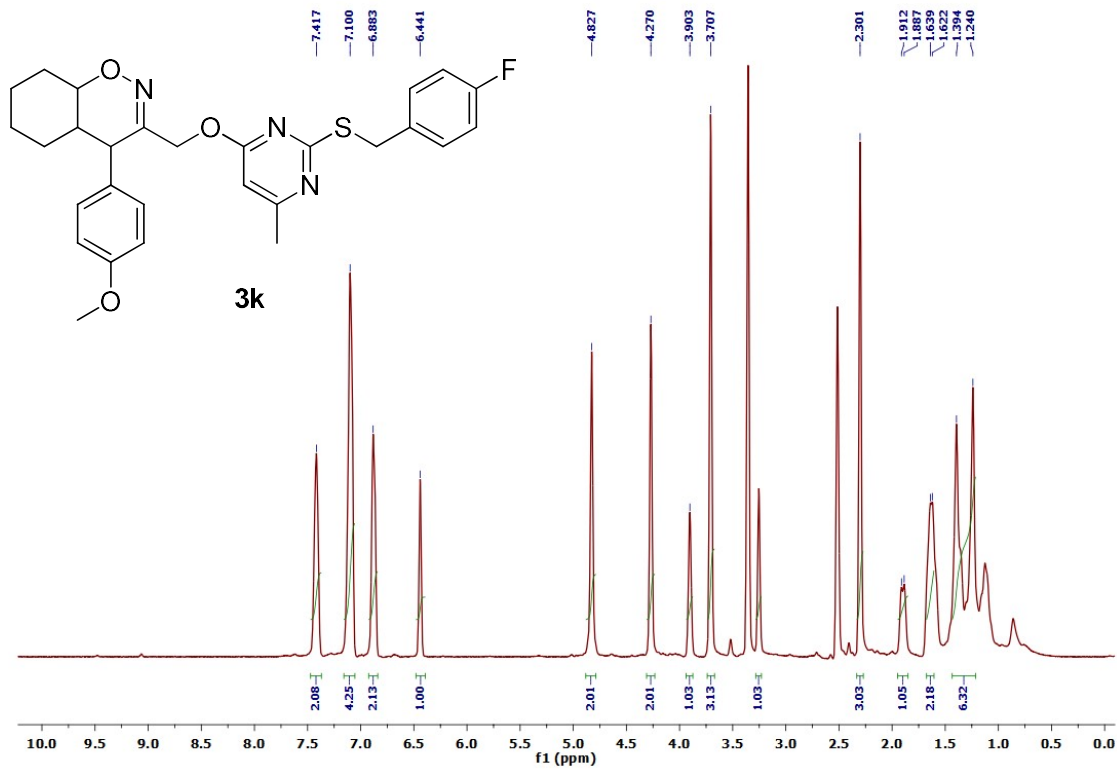

$^1H$  NMR OF **3k**

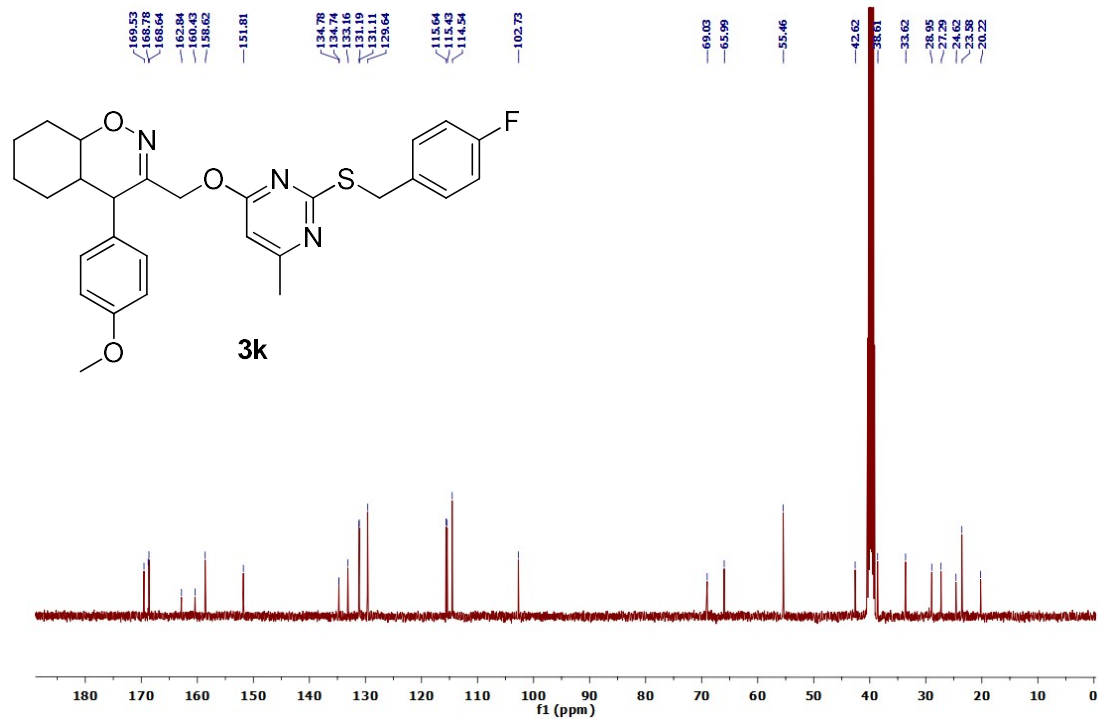

$^{13}\text{C}$  NMR OF **3k**

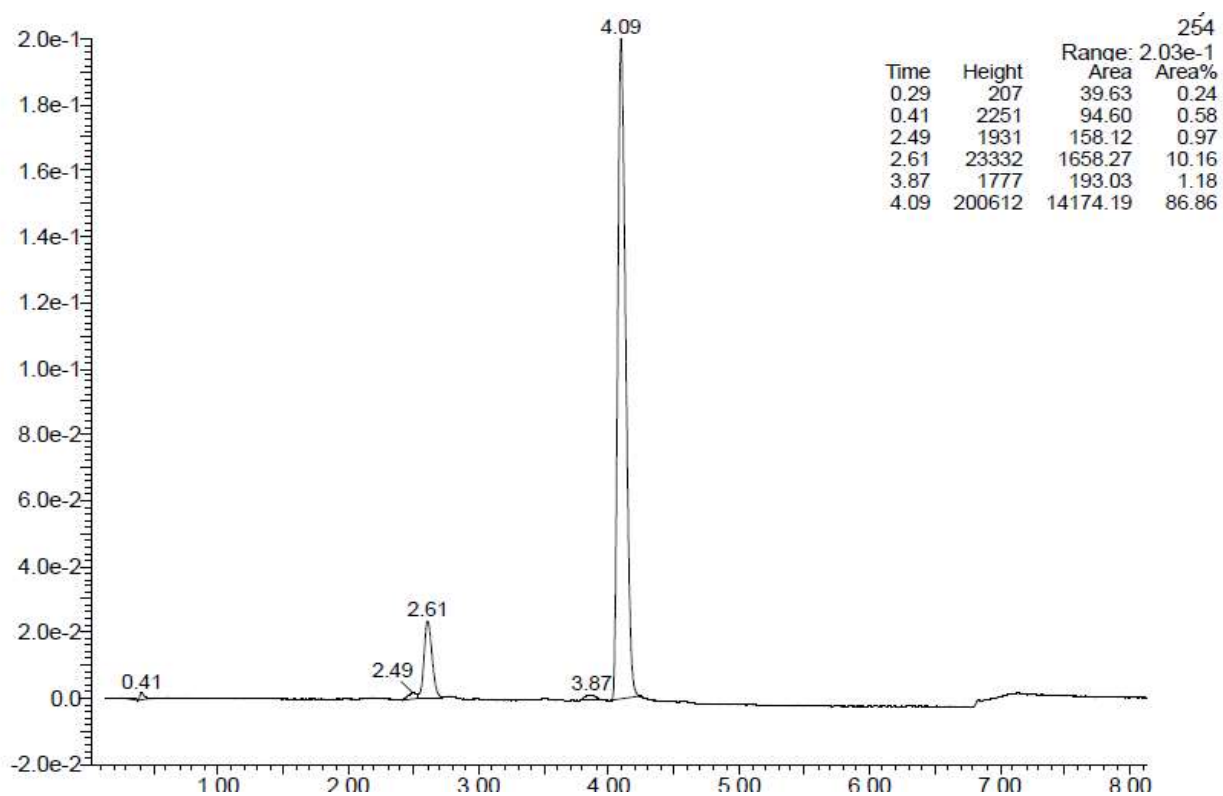

Liquid chromatogram of **3k**

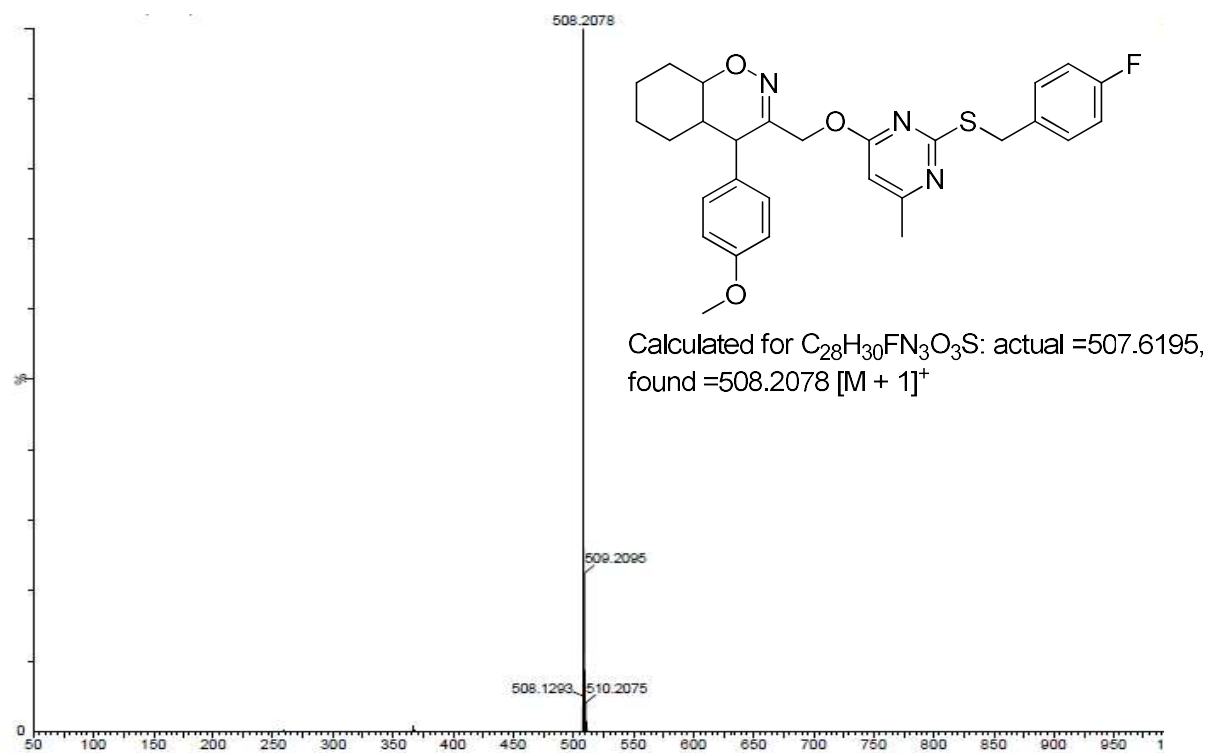

Mass spectra of **3k**

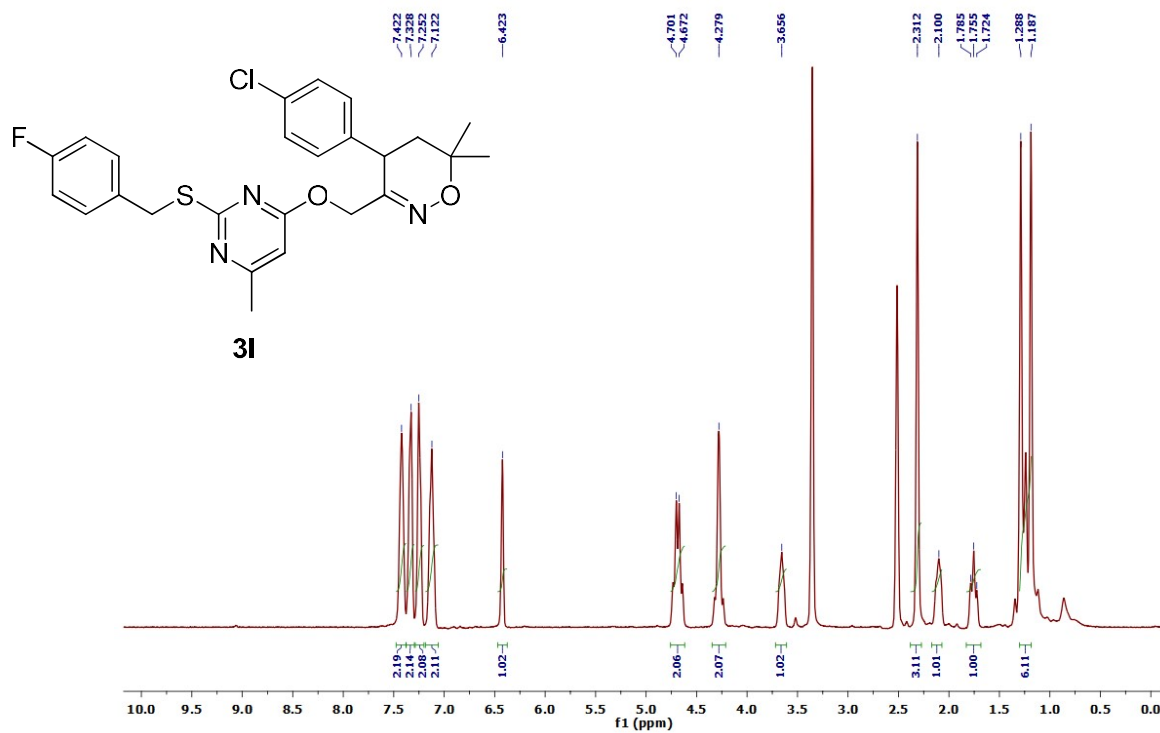

$^1H$  NMR OF **3l**

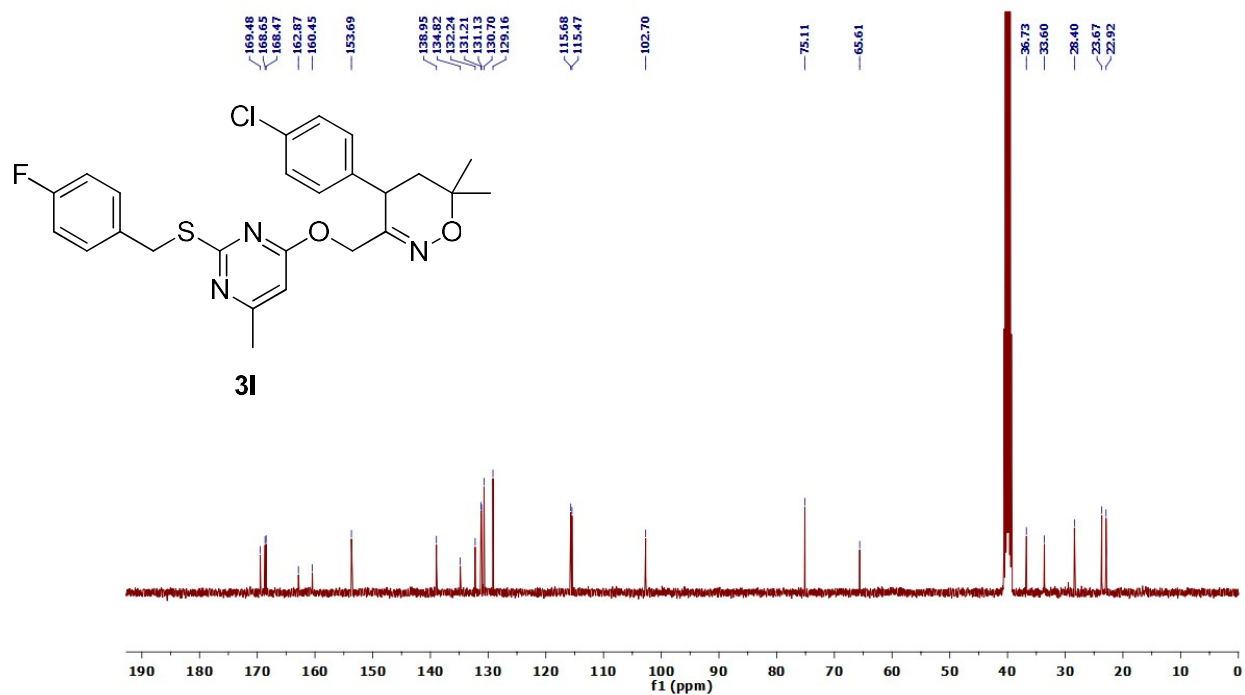

<sup>13</sup>C NMR OF 31

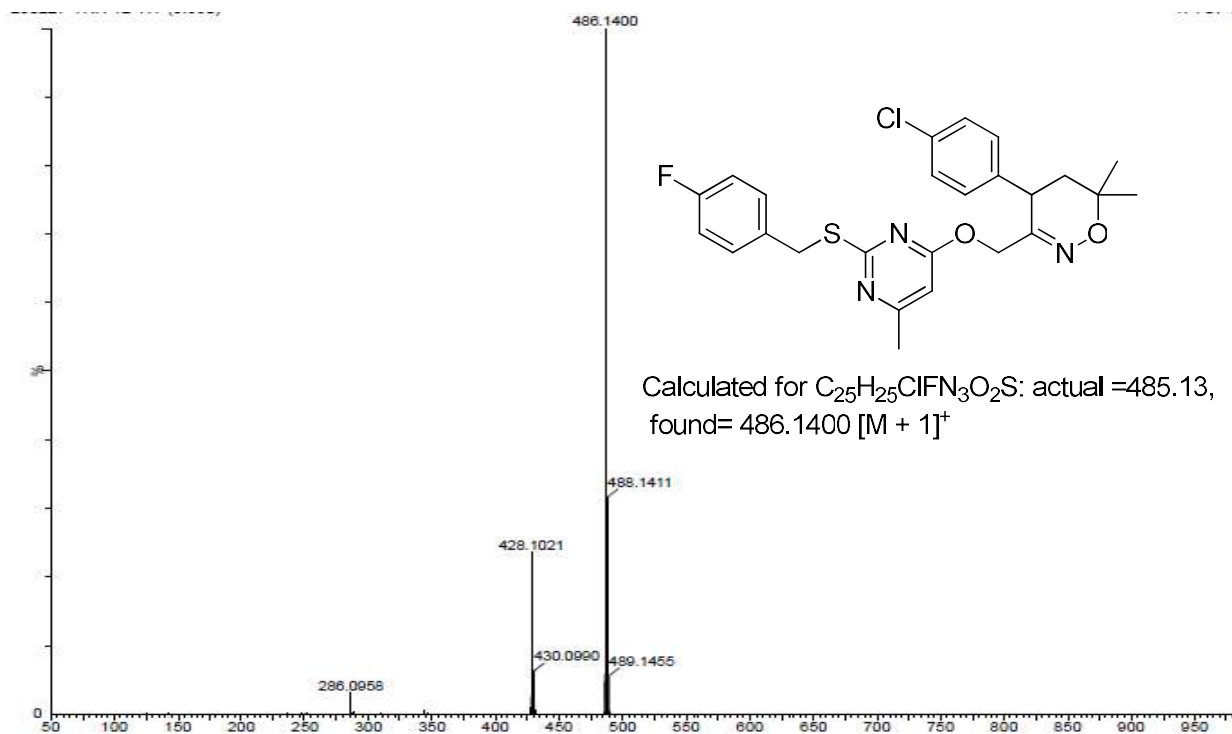

Mass spectra of 31

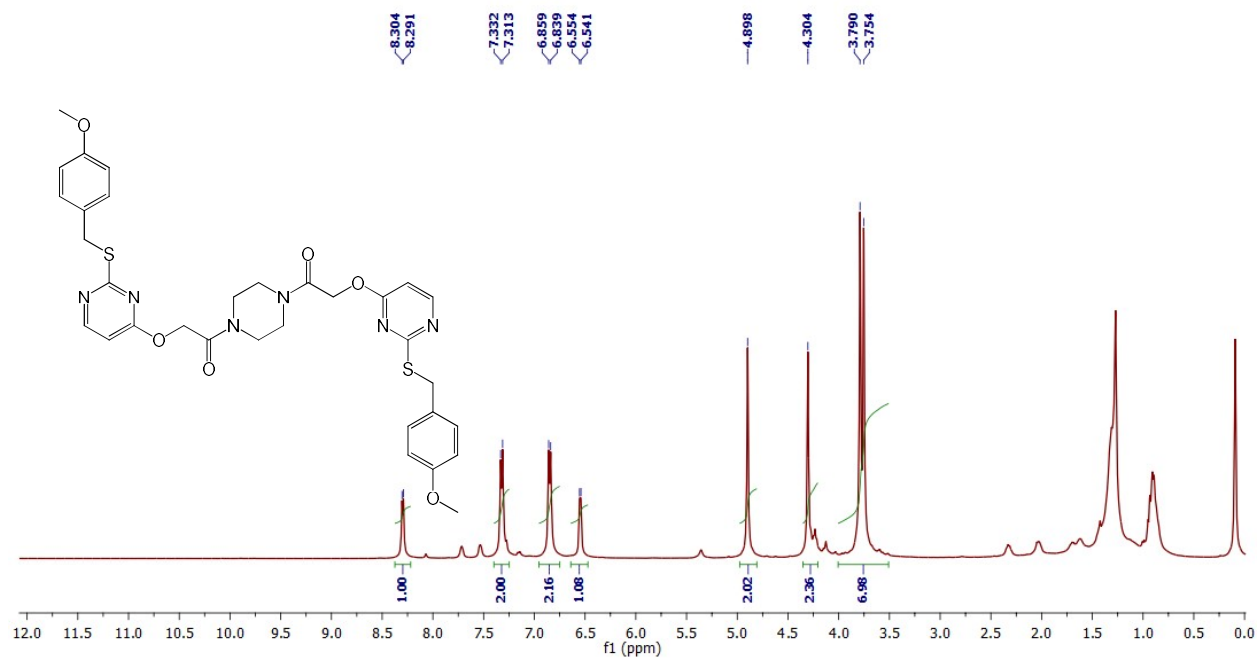

<sup>1</sup>H NMR of **5a**

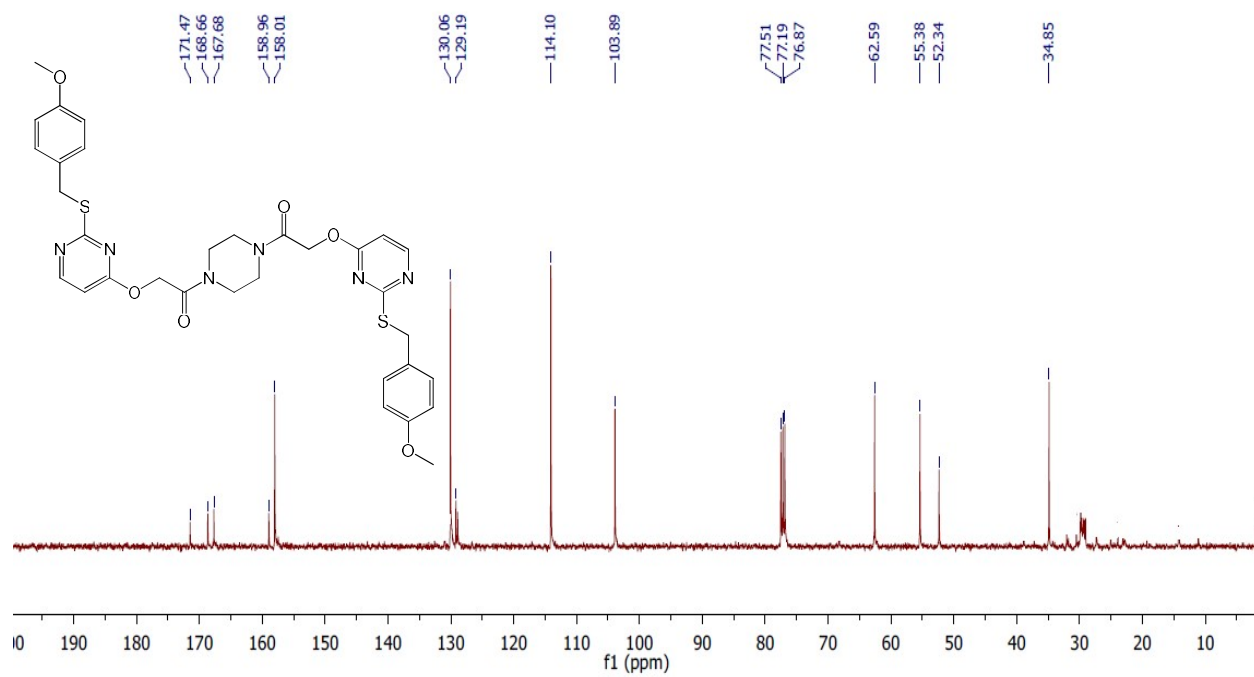

<sup>13</sup>C NMR of **5a**

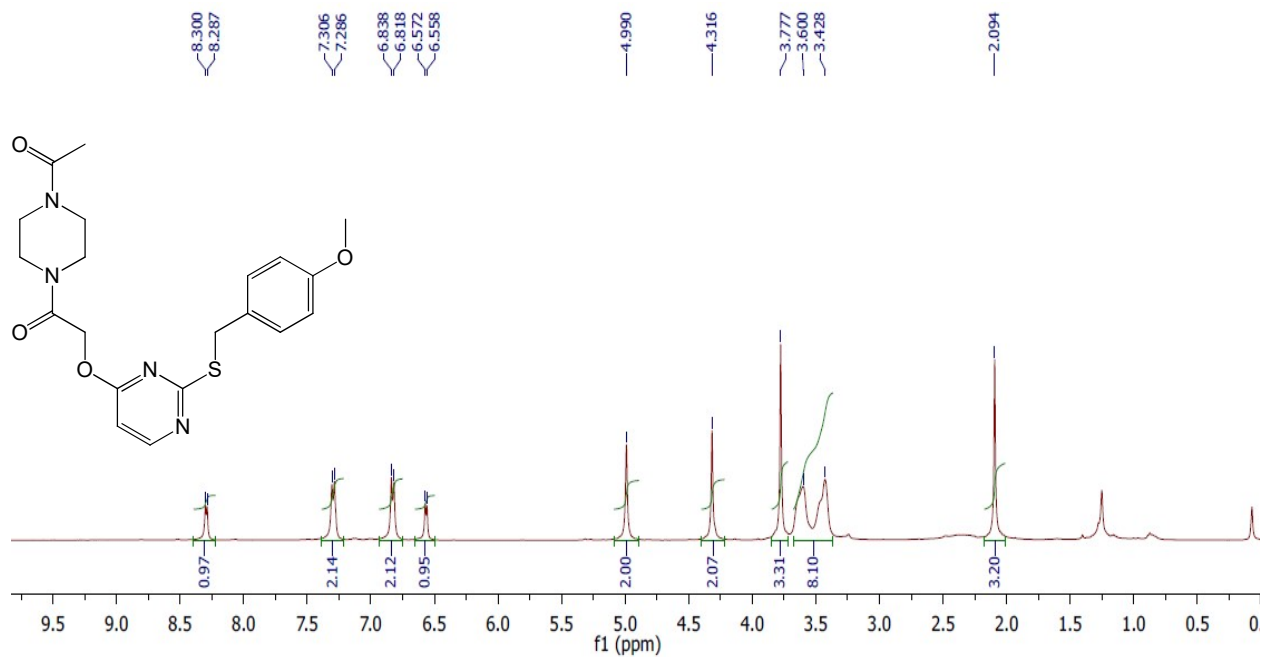

<sup>1</sup>H NMR of **5b**

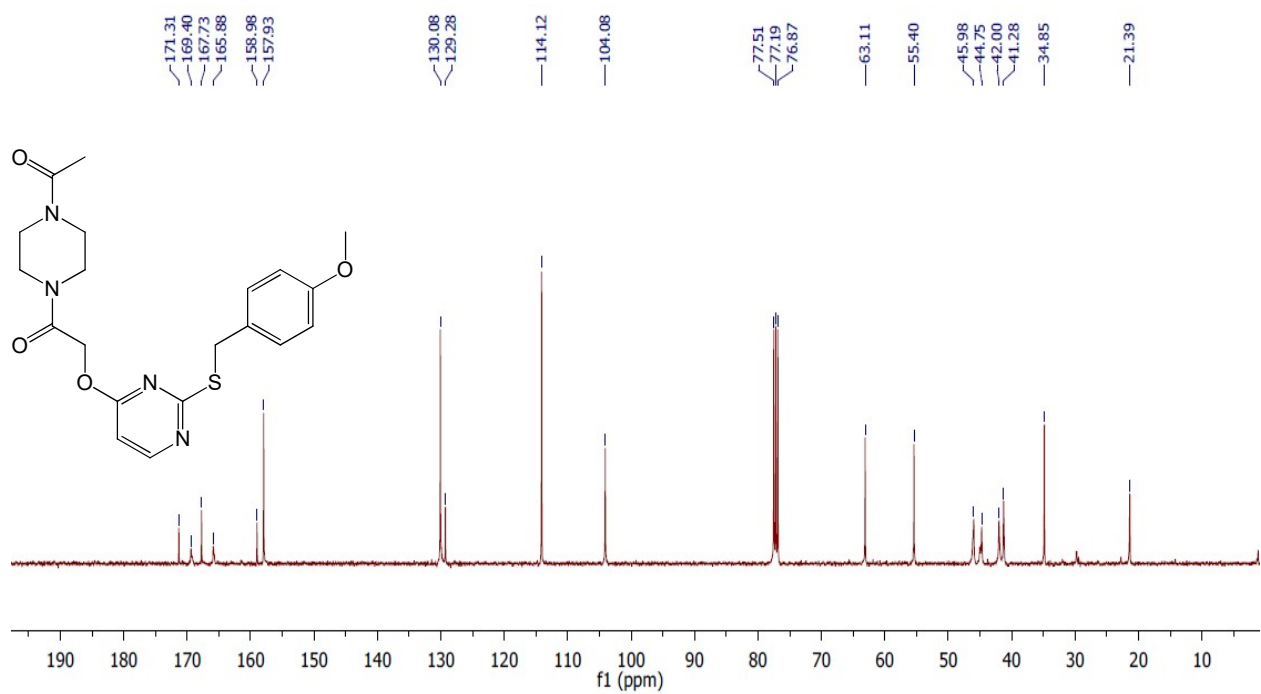

<sup>13</sup>C NMR of **5b**

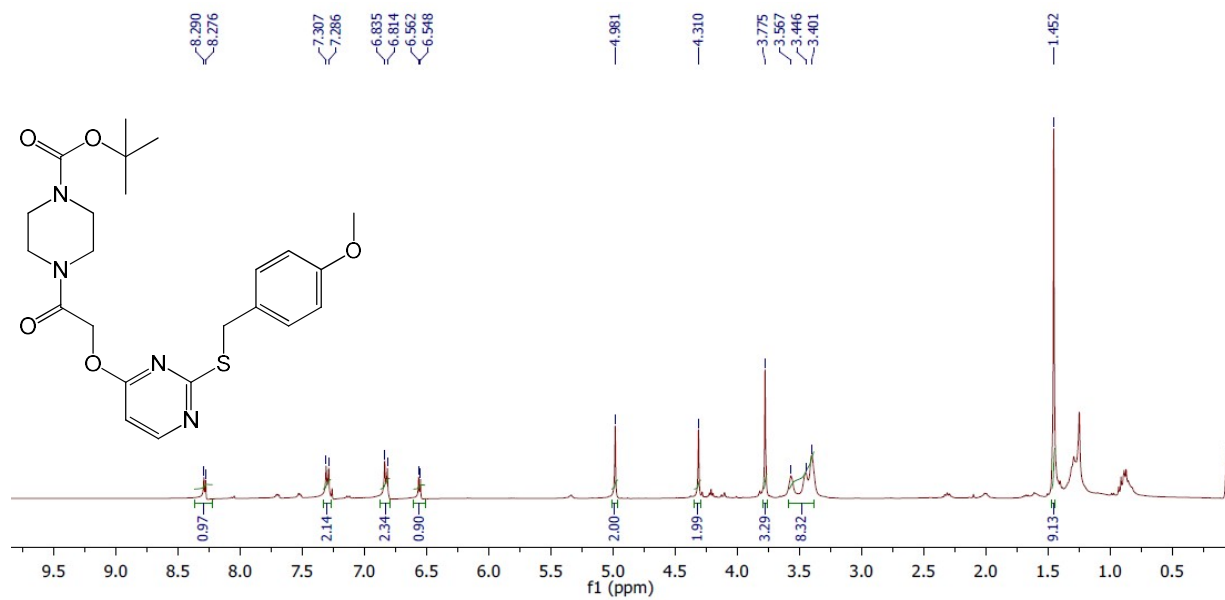

<sup>1</sup>H NMR of **5c**

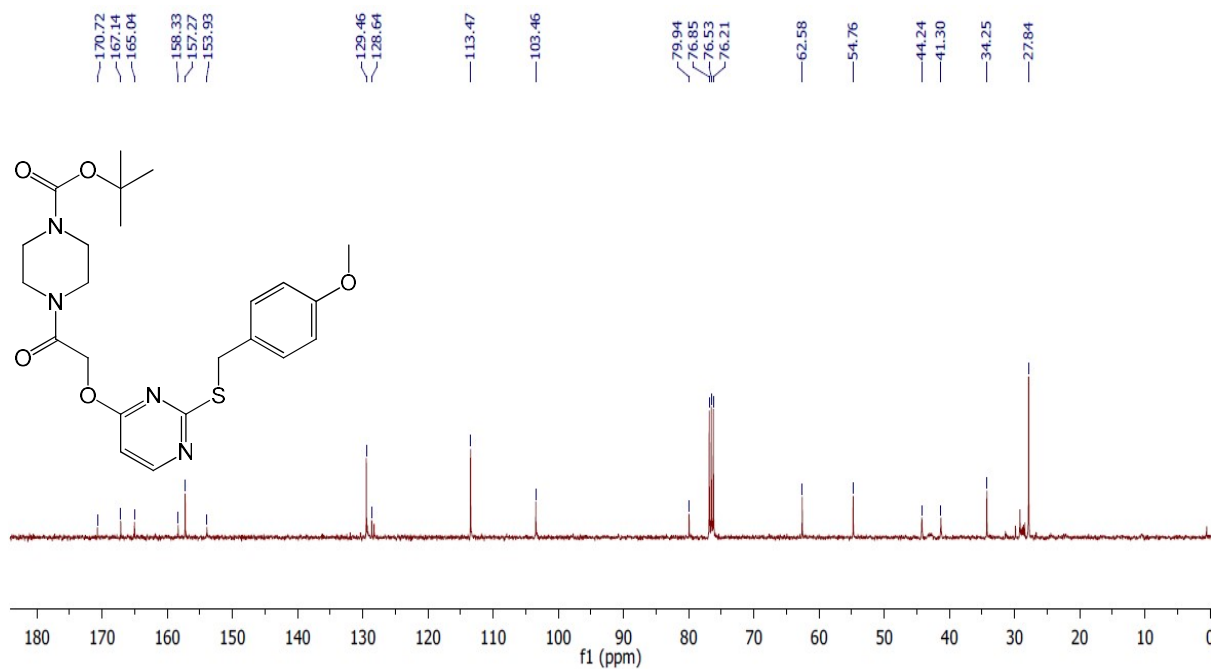

<sup>13</sup>C NMR of **5c**

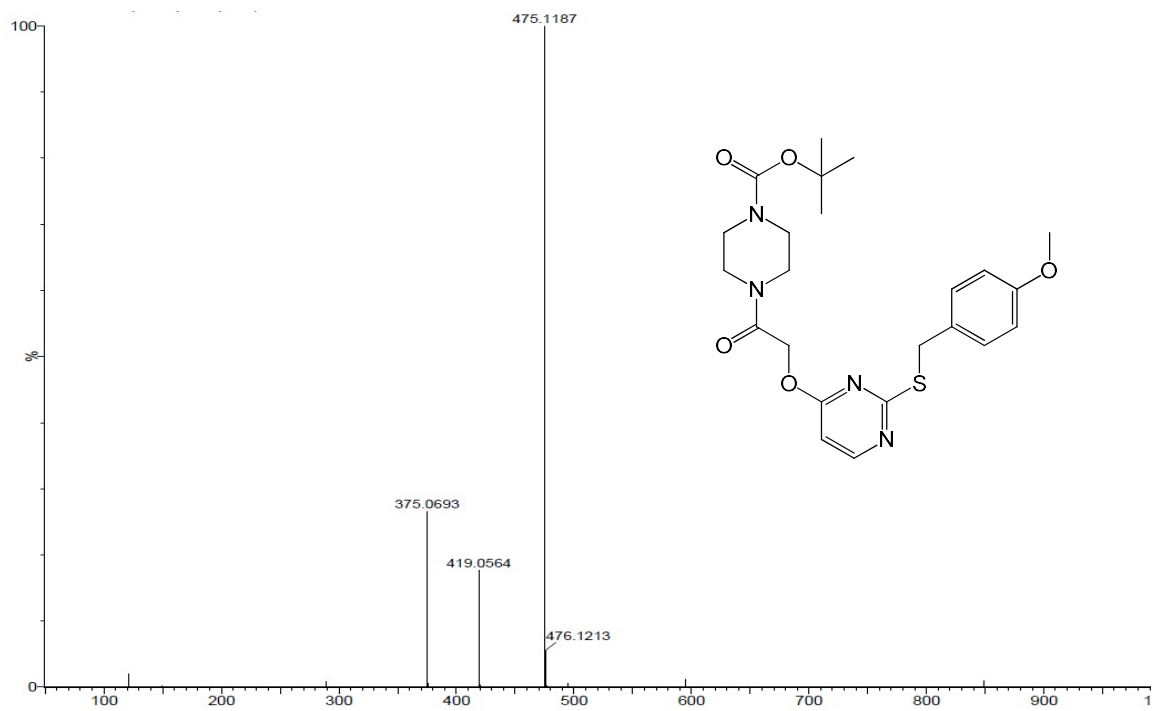

Mass spectra of 5c

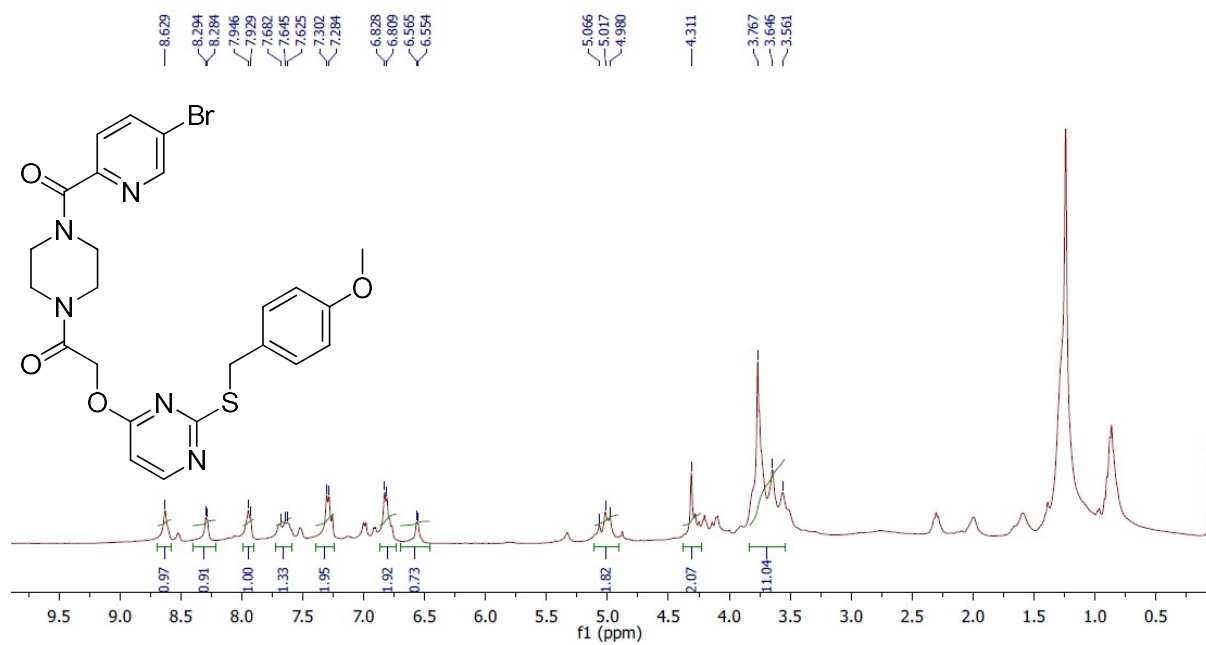

<sup>1</sup>H NMR of 5d

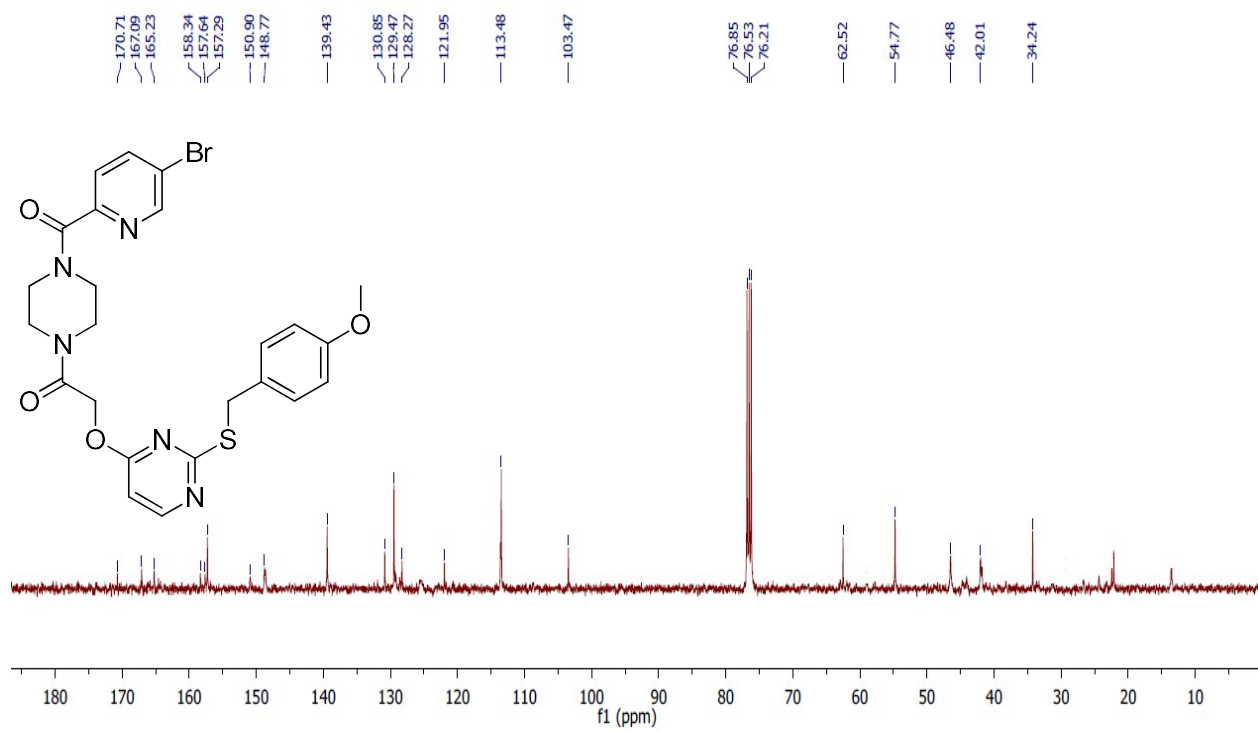

<sup>13</sup>C NMR of **5d**

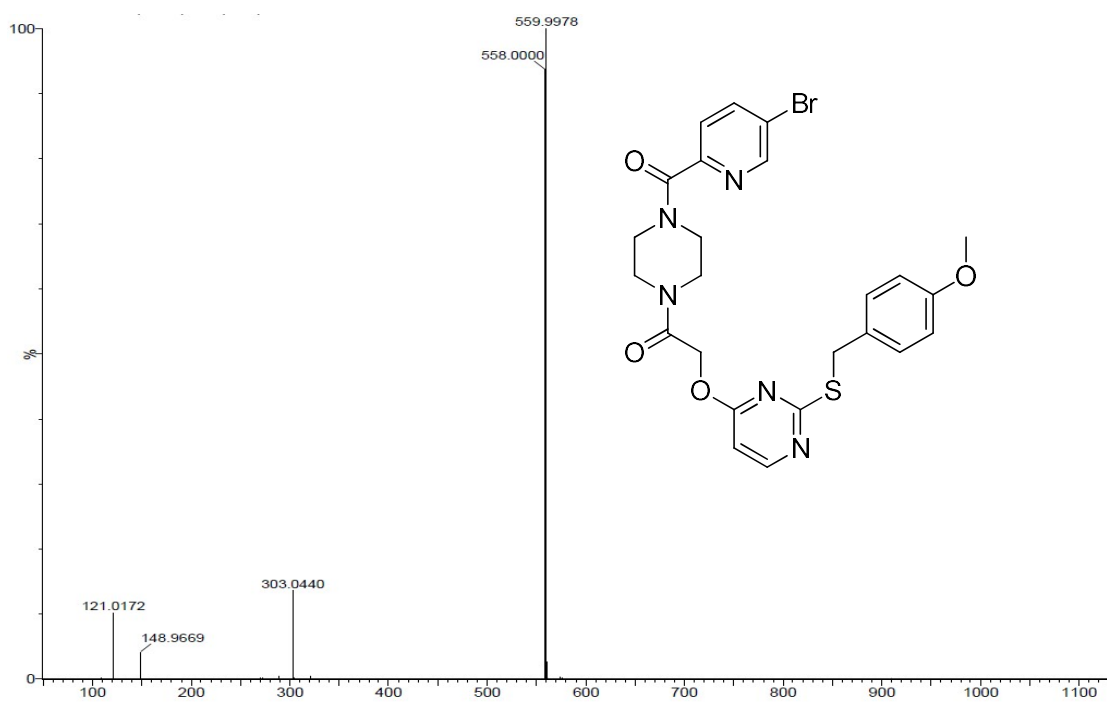

Mass spectra of **5d**

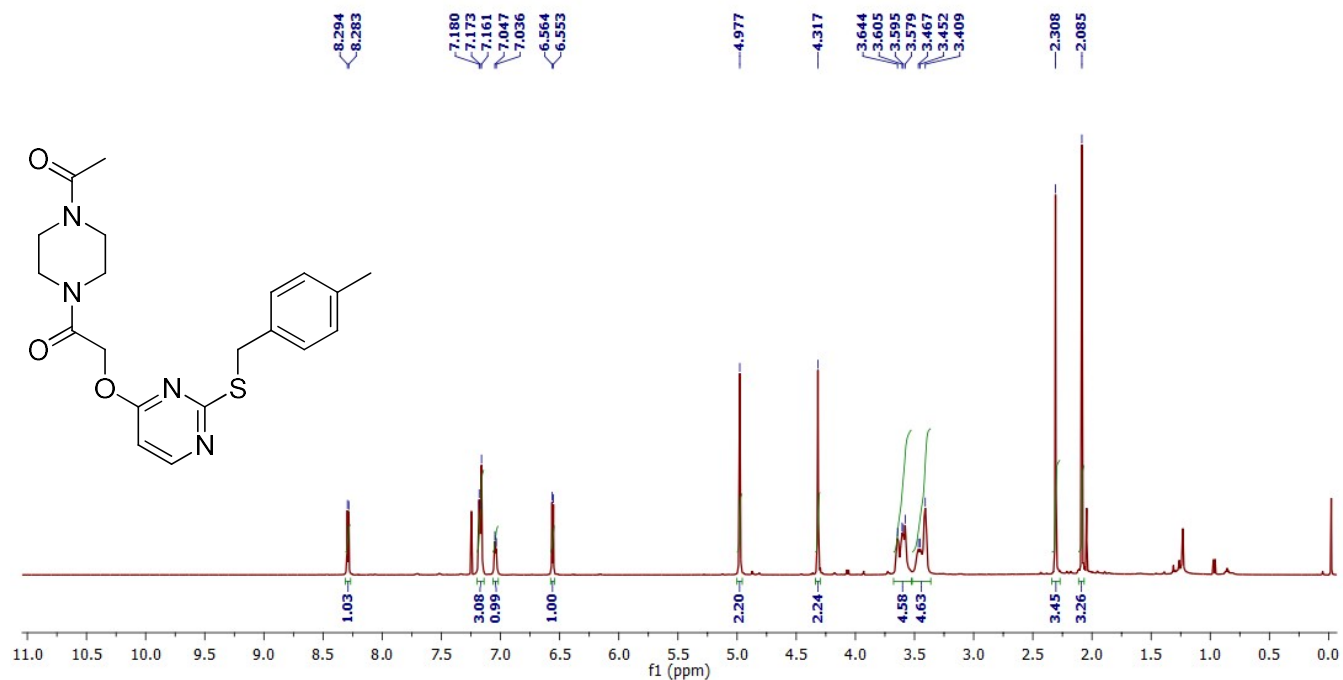

<sup>1</sup>H NMR of 5e

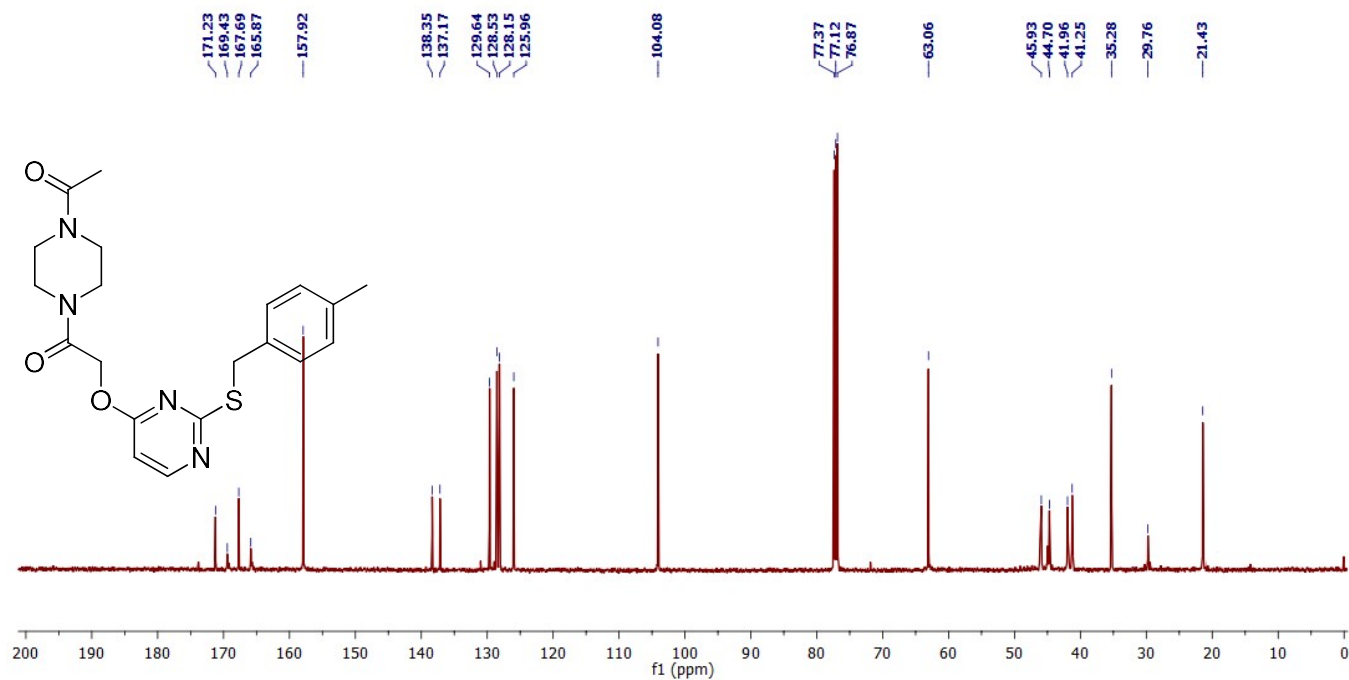

<sup>13</sup>C NMR of 5e

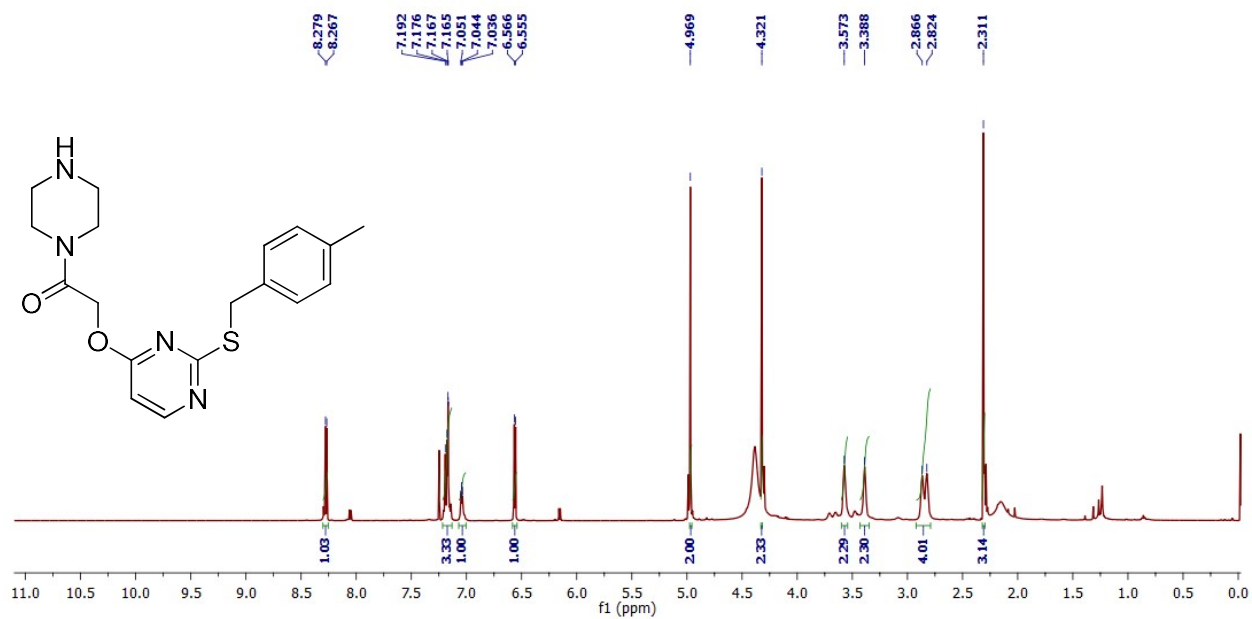

<sup>1</sup>H NMR of 5f

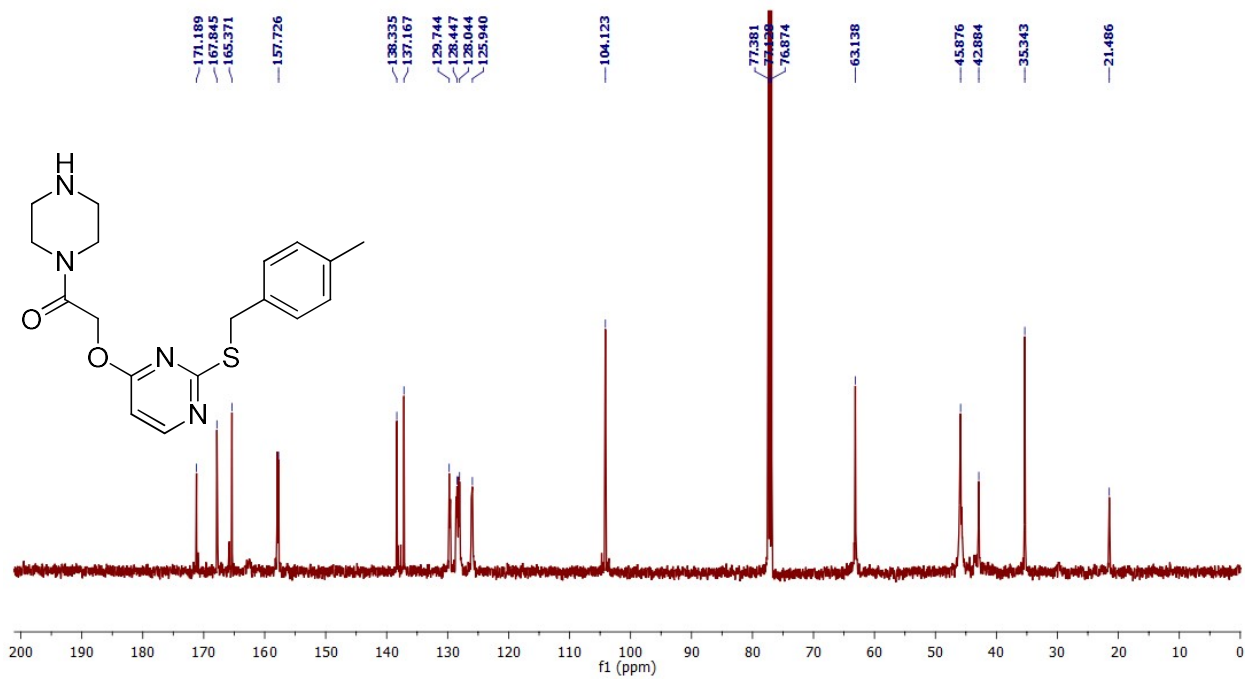

<sup>13</sup>C NMR of 5f

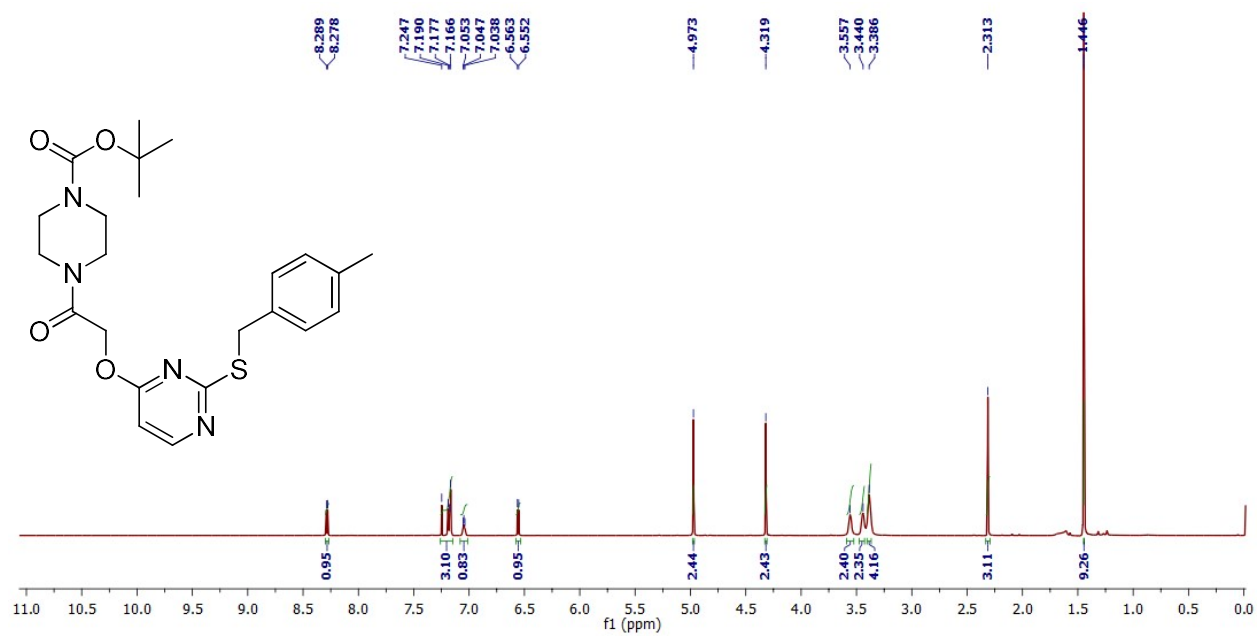

<sup>1</sup>H NMR of 5g

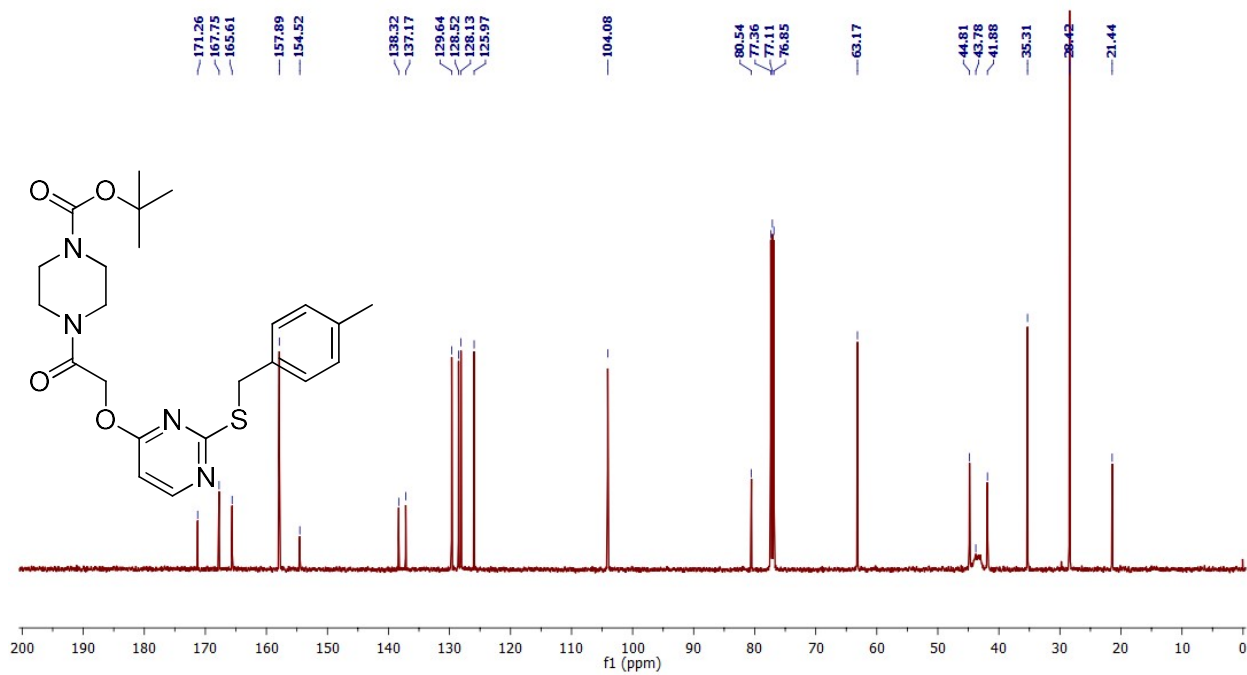

<sup>13</sup>C NMR of 5g

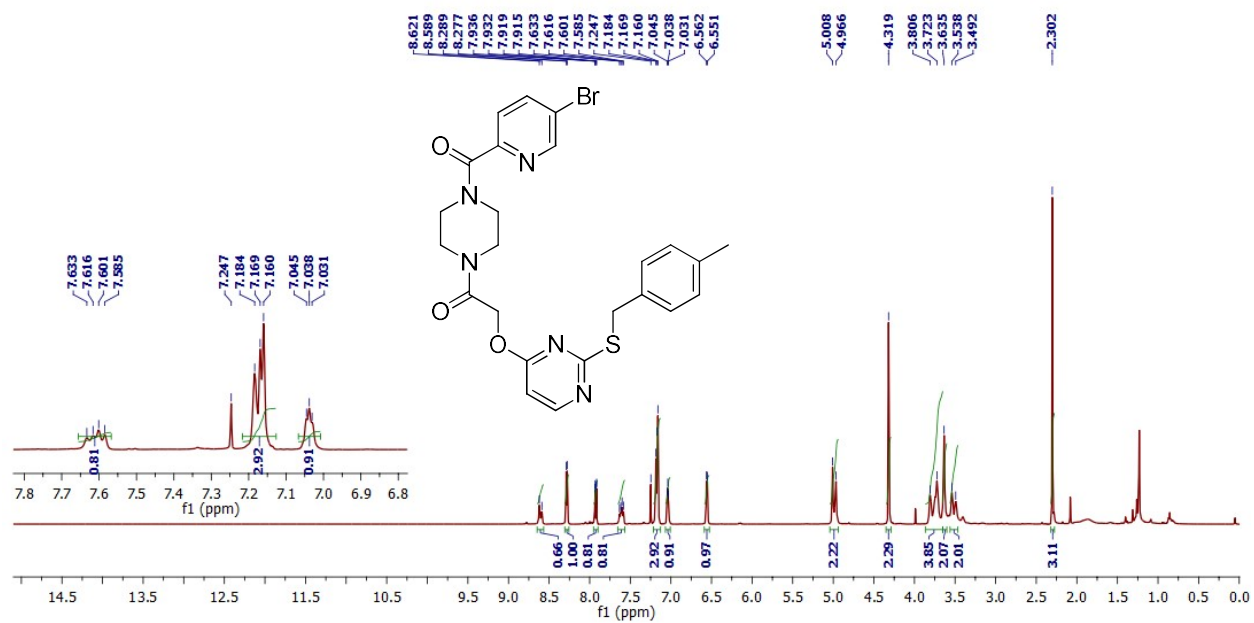

<sup>1</sup>H NMR of 5h

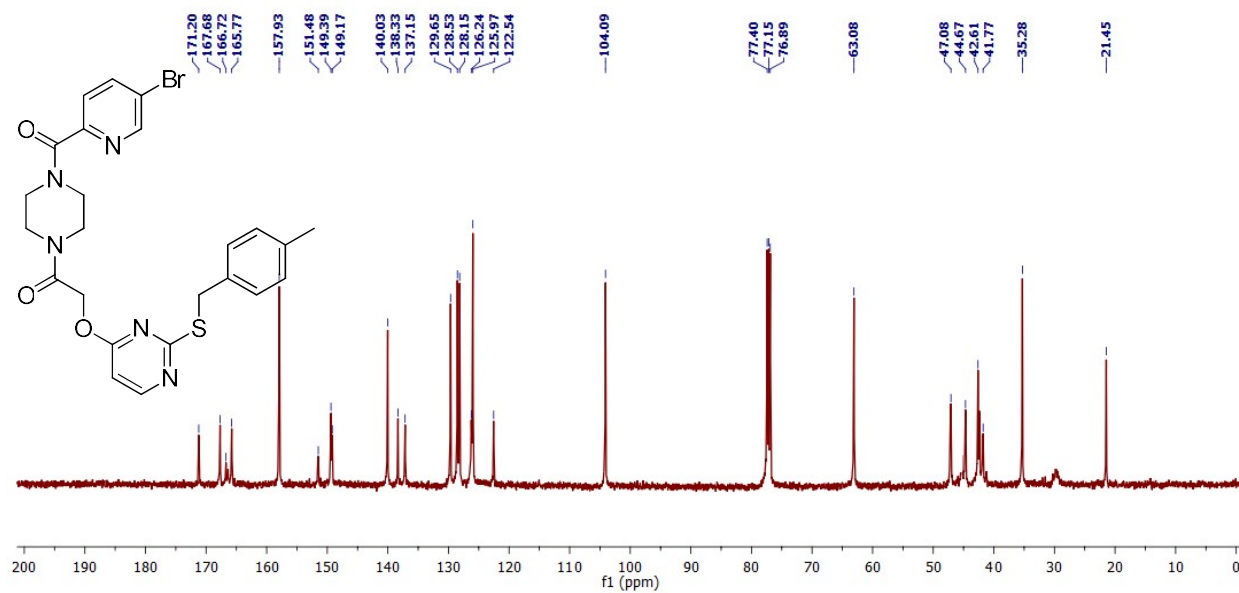

<sup>13</sup>C NMR of 5h

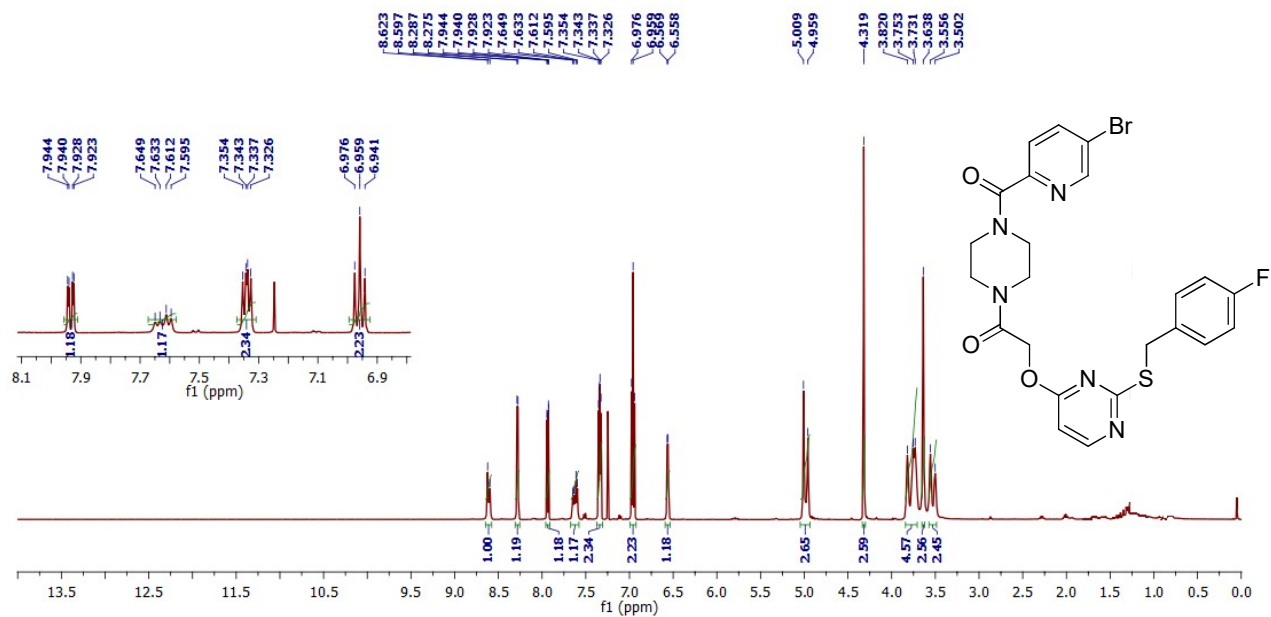

<sup>1</sup>H NMR of 5i

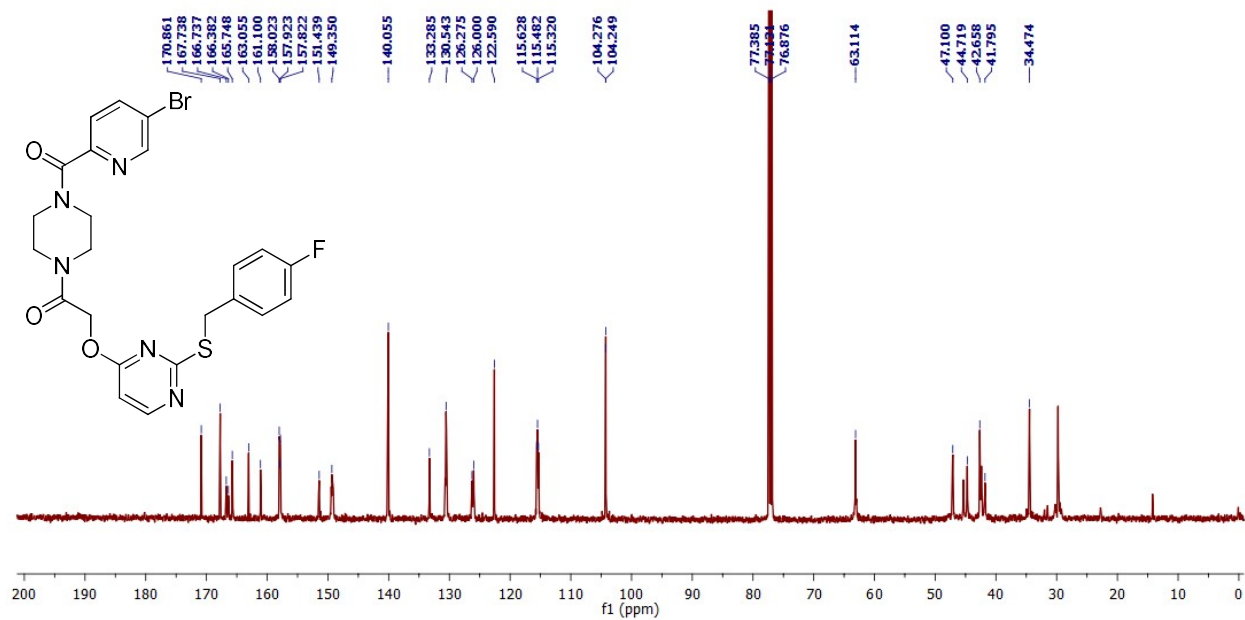

<sup>13</sup>C NMR of 5i

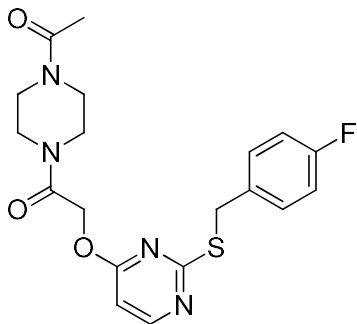<sup>1</sup>H NMR of 5j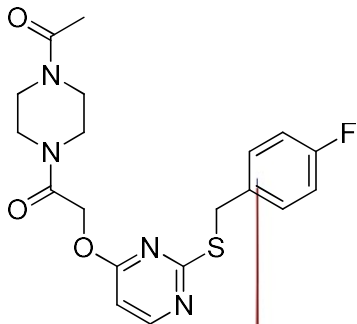<sup>13</sup>C NMR of 5j

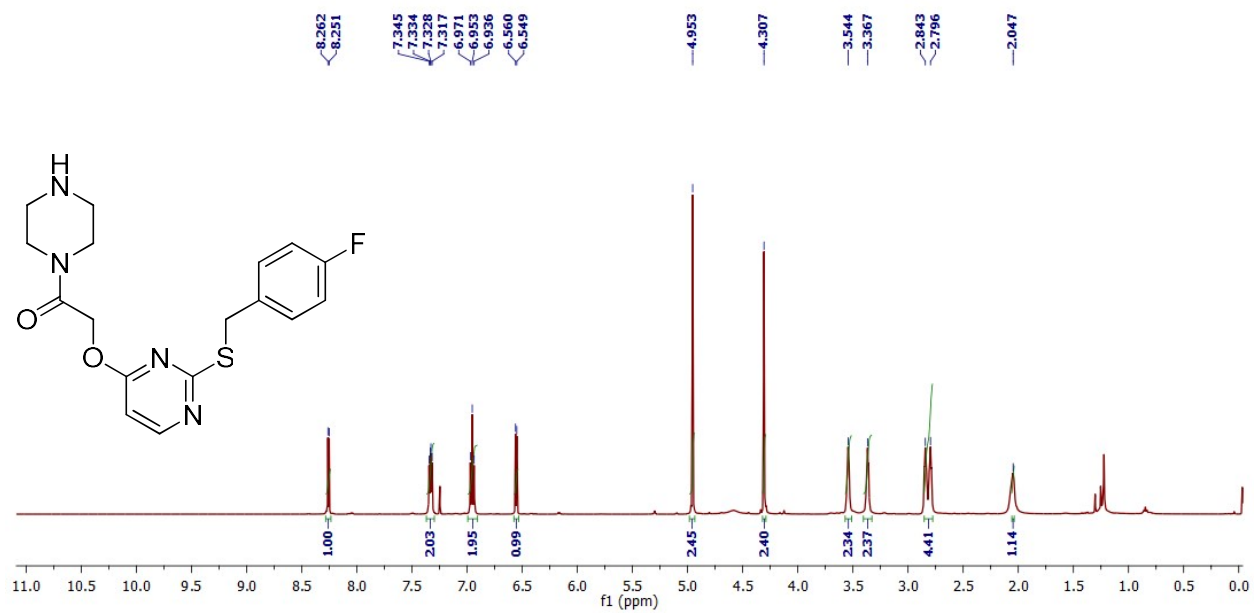

<sup>1</sup>H NMR of 5k

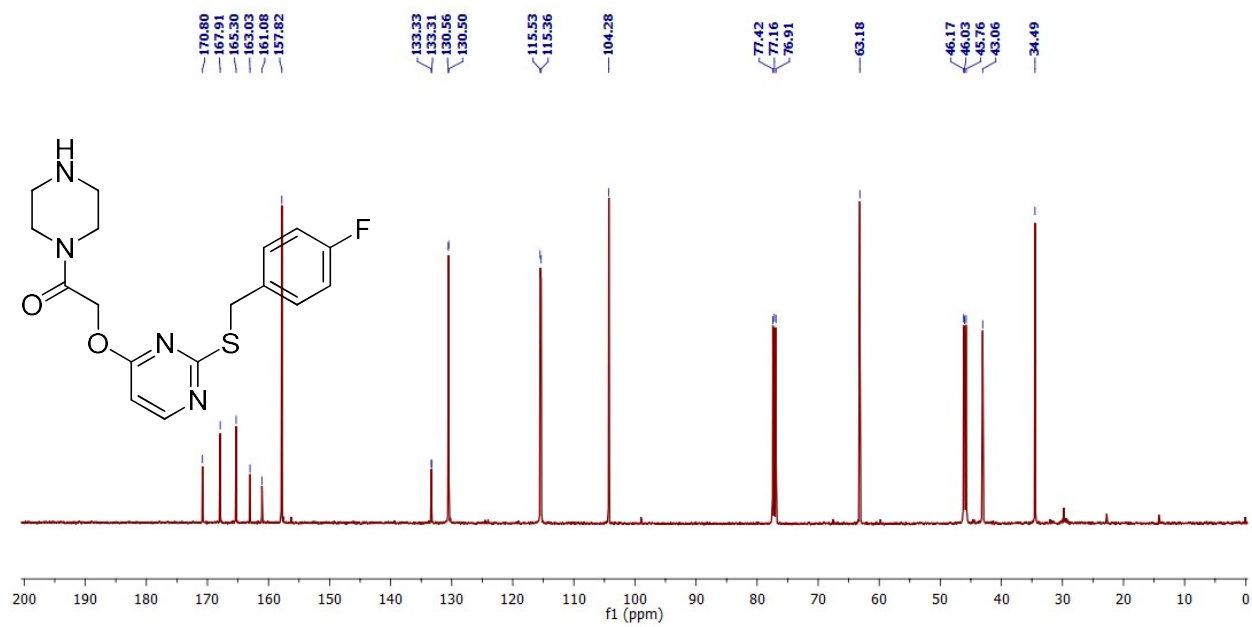

<sup>13</sup>C NMR of 5k

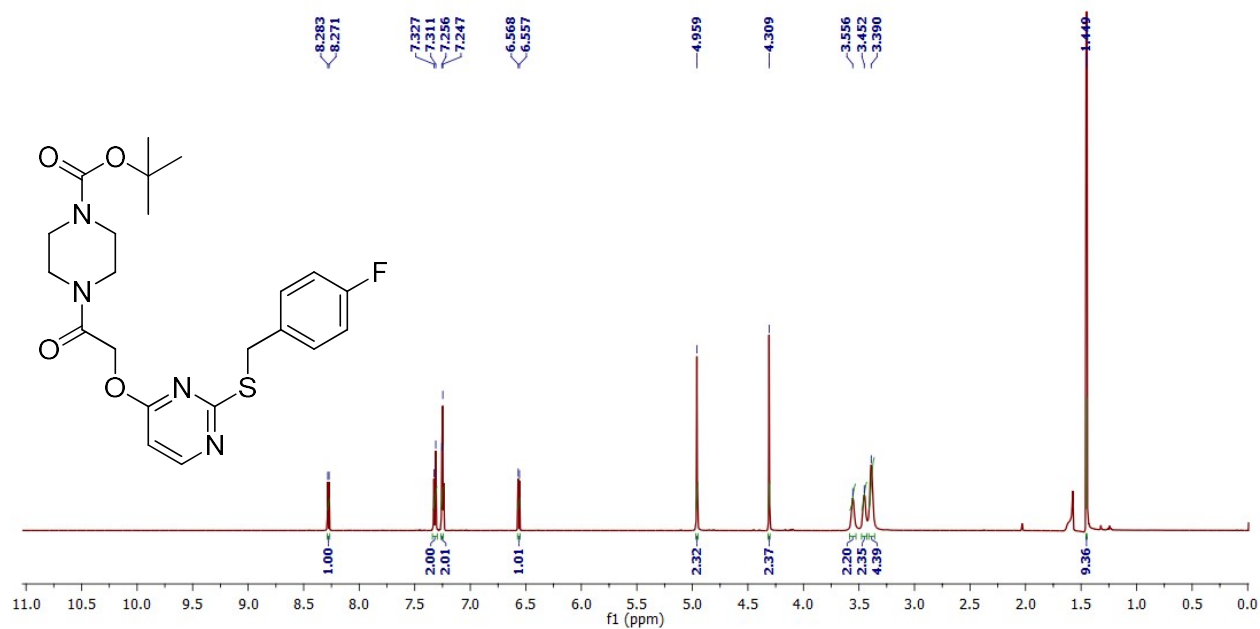

$^1\text{H}$  NMR of 51

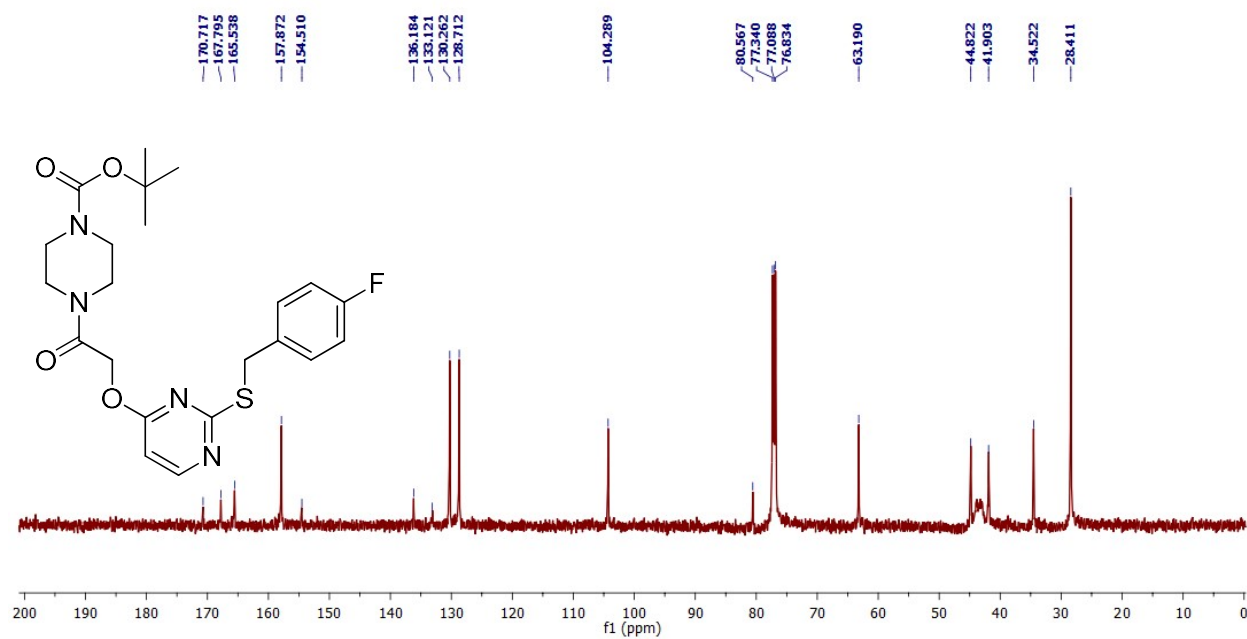

$^{13}\text{C}$  NMR of 51

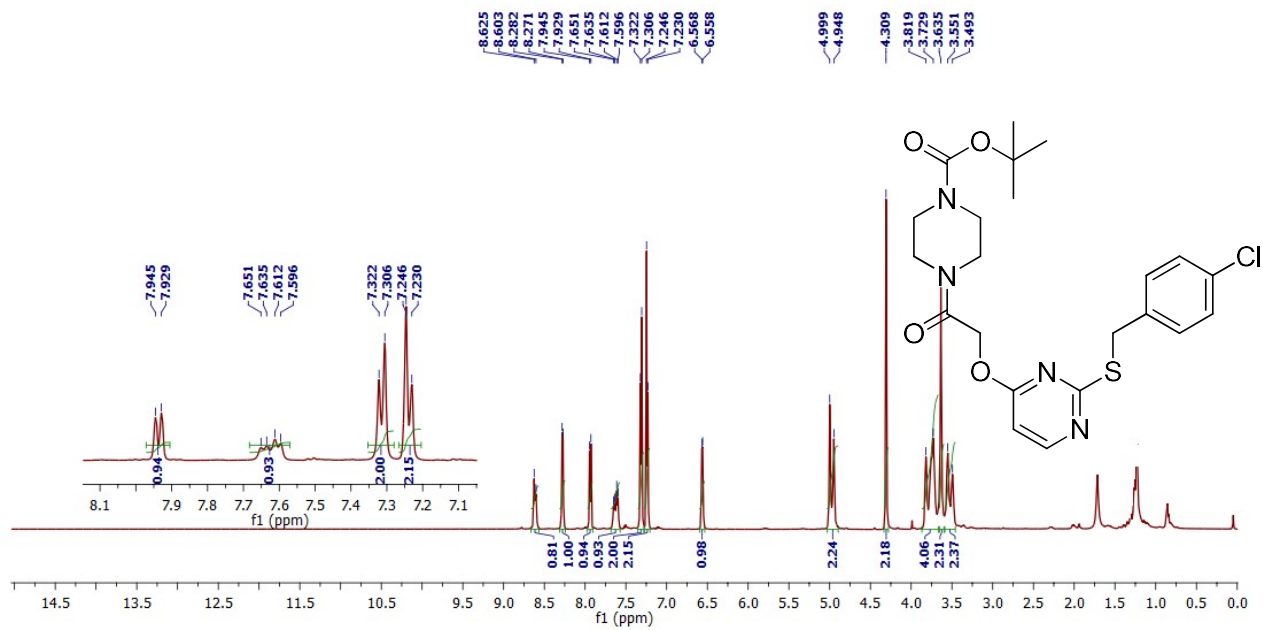

<sup>1</sup>H NMR of 5m

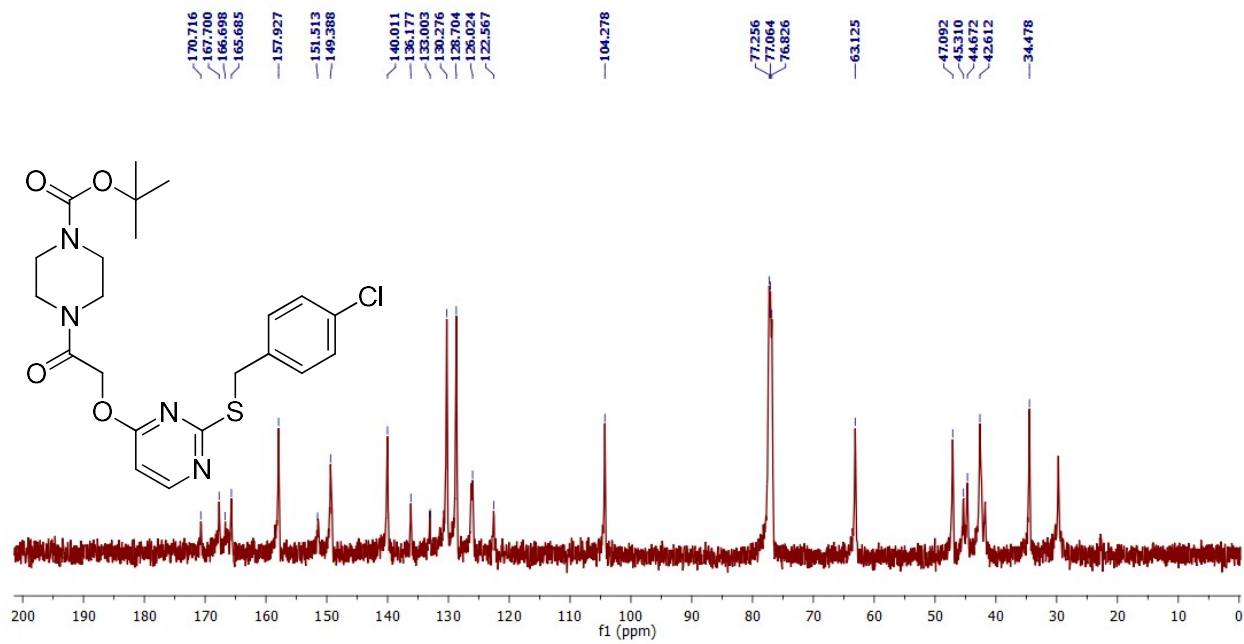

<sup>13</sup>C NMR of 5m

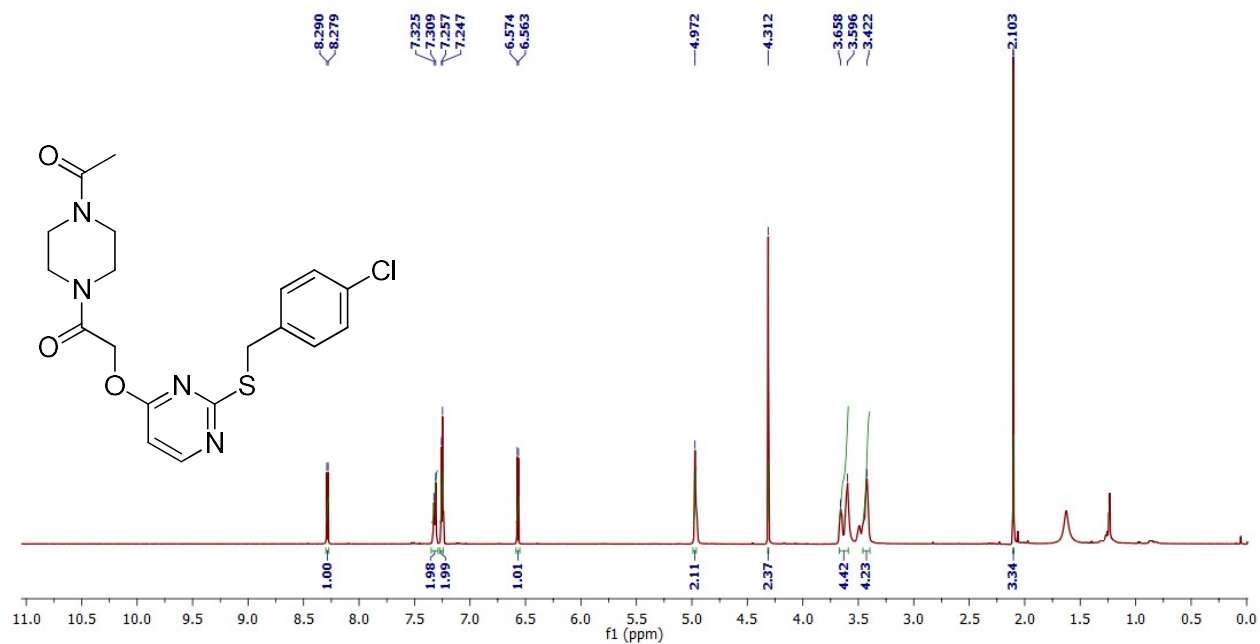

<sup>1</sup>H NMR of 5n

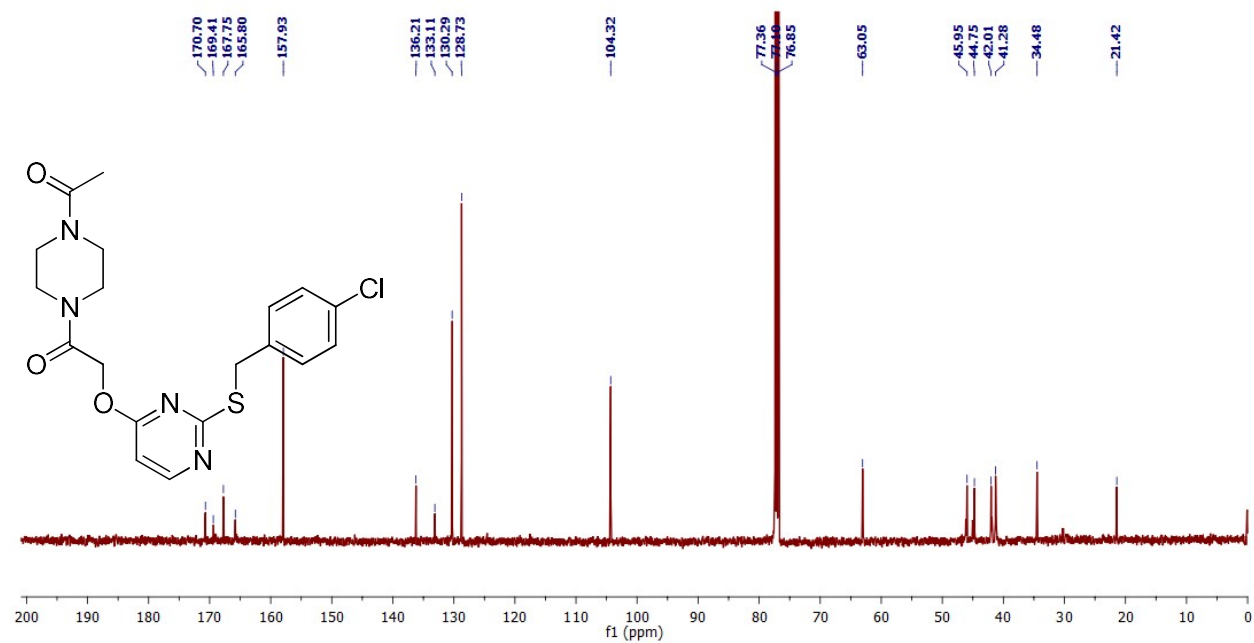

<sup>13</sup>C NMR of 5n

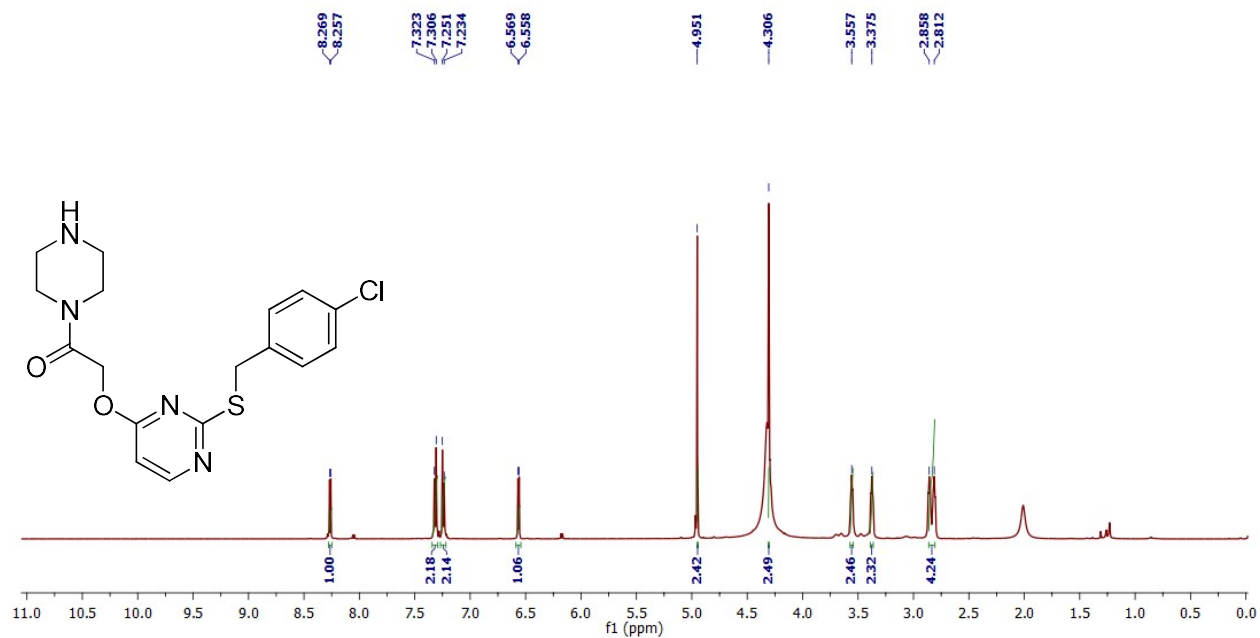

<sup>1</sup>H NMR of **5o**

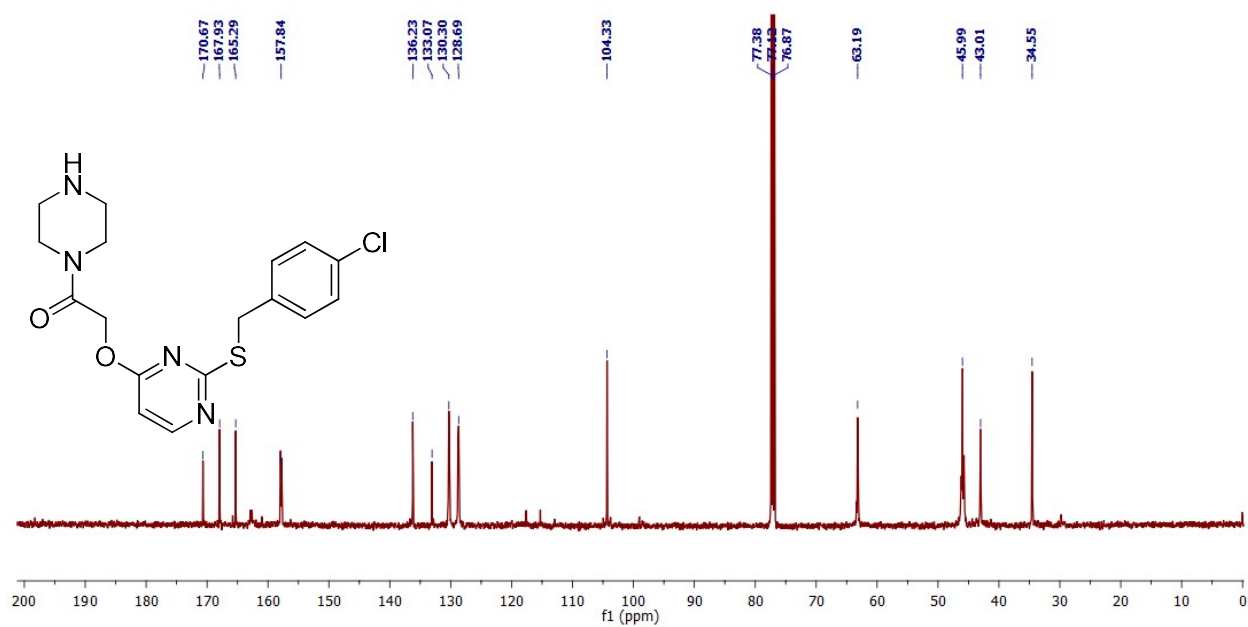

<sup>13</sup>C NMR of **5o**

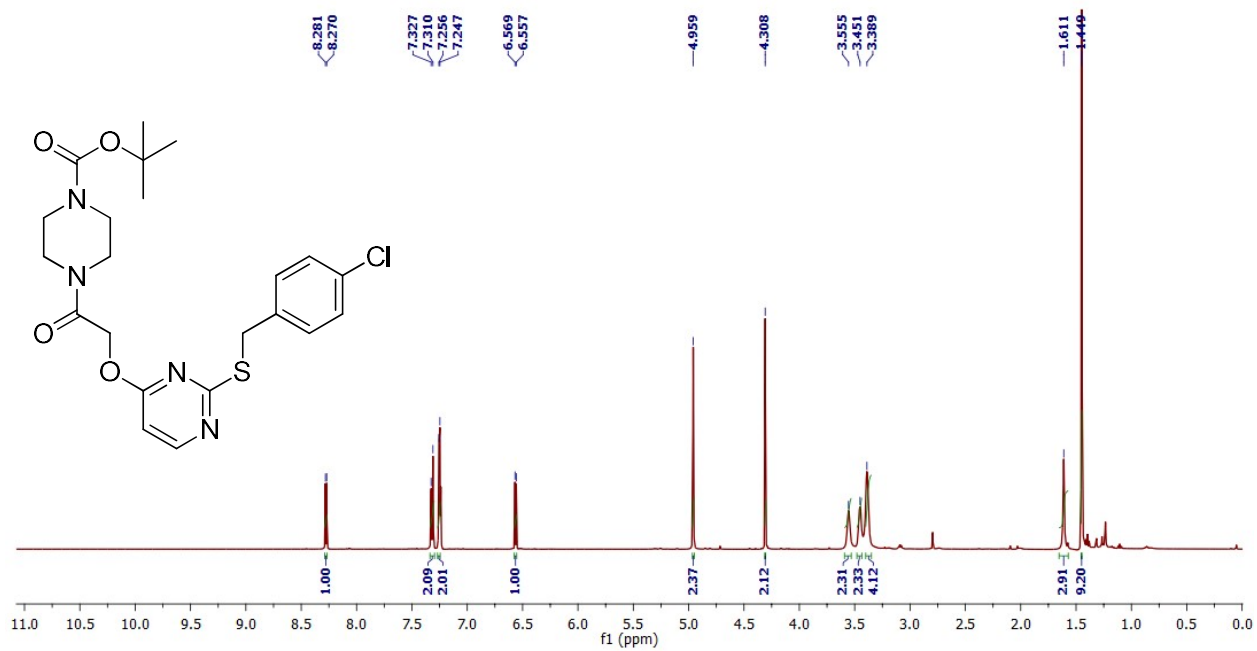

<sup>1</sup>H NMR of 5p

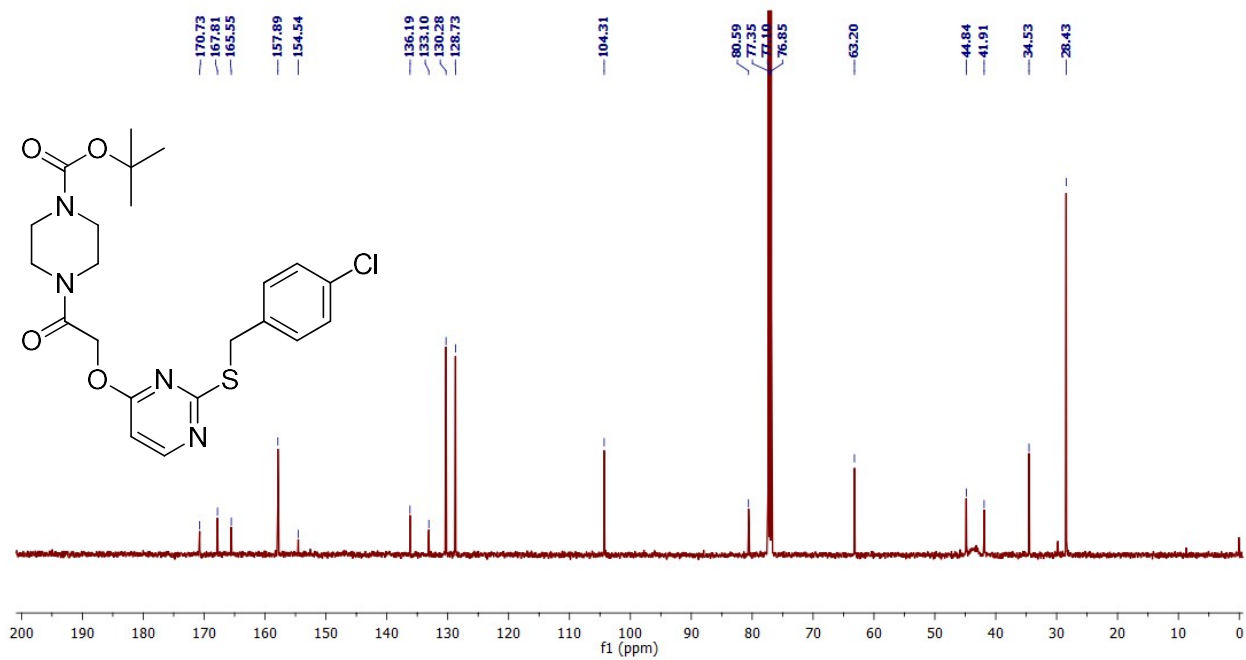

<sup>13</sup>C NMR of 5p

IC<sub>50</sub> values of molecules **3(a-j)** & **5(a-p)** against MCF-7 cells

**3a**

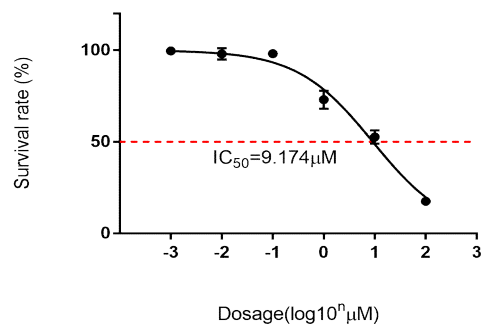

- Cell line: MCF7(2000cells/per well|96-well plate)
- Treated time: 72hrs
- Assay: alamarBlue(4hrs incubated) N=3

| Conc.(μM) | Viability |      |
|-----------|-----------|------|
|           | AVE.      | ±SD  |
| 0         | 100       | 0.27 |
| 0.01      | 98.06     | 3.13 |
| 0.1       | 98.11     | 2.05 |
| 1         | 73.01     | 4.97 |
| 10        | 52.68     | 3.62 |
| 100       | 17.52     | 1.29 |

**3b**

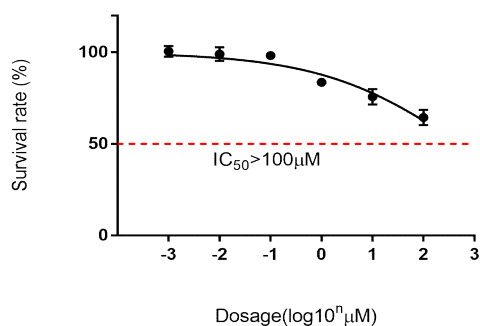

| Conc.(μM) | Viability |      |
|-----------|-----------|------|
|           | AVE.      | ±SD  |
| 0         | 100.00    | 2.93 |
| 0.01      | 99.07     | 3.75 |
| 0.1       | 98.28     | 2.14 |
| 1         | 83.64     | 1.74 |
| 10        | 75.75     | 4.18 |
| 100       | 64.42     | 4.23 |

**3c**

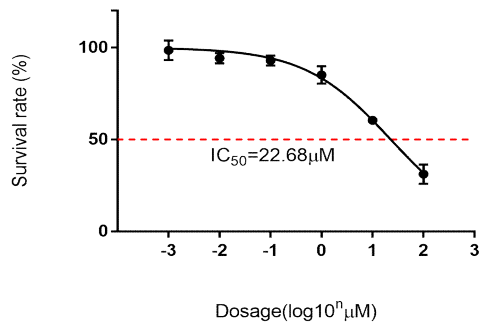

| Conc.(μM) | Viability |      |
|-----------|-----------|------|
|           | AVE.      | ±SD  |
| 0         | 100.00    | 5.34 |
| 0.01      | 94.21     | 2.83 |
| 0.1       | 92.98     | 2.71 |
| 1         | 85.10     | 4.75 |
| 10        | 60.48     | 0.85 |
| 100       | 31.20     | 5.23 |

3d

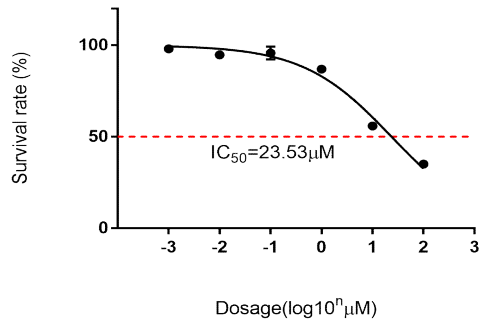

- Cell line: MCF7(2000cells/per well|96-well plate)
- Treated time: 72hrs
- Assay: alamarBlue(4hrs incubated) N=3

| Conc.( $\mu\text{M}$ ) | Viability |                |
|------------------------|-----------|----------------|
|                        | AVE.      | $\pm\text{SD}$ |
| 0                      | 100.00    | 0.76           |
| 0.01                   | 94.73     | 1.24           |
| 0.1                    | 95.79     | 3.50           |
| 1                      | 86.90     | 1.67           |
| 10                     | 55.82     | 0.61           |
| 100                    | 35.09     | 0.30           |

3e

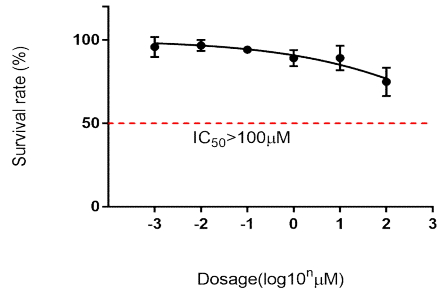

| Conc.( $\mu\text{M}$ ) | Viability |                |
|------------------------|-----------|----------------|
|                        | AVE.      | $\pm\text{SD}$ |
| 0                      | 100.00    | 5.97           |
| 0.01                   | 96.79     | 3.36           |
| 0.1                    | 94.21     | 1.42           |
| 1                      | 89.20     | 4.87           |
| 10                     | 89.28     | 7.38           |
| 100                    | 74.97     | 8.48           |

3f

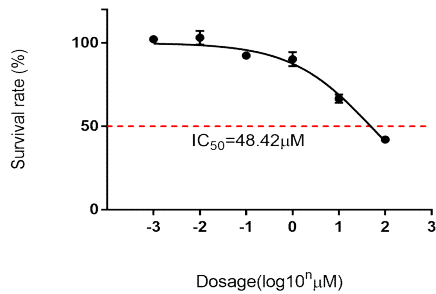

| Conc.( $\mu\text{M}$ ) | Viability |                |
|------------------------|-----------|----------------|
|                        | AVE.      | $\pm\text{SD}$ |
| 0                      | 100.00    | 1.36           |
| 0.01                   | 103.18    | 4.10           |
| 0.1                    | 92.45     | 1.15           |
| 1                      | 90.23     | 4.19           |
| 10                     | 66.65     | 2.52           |
| 100                    | 42.01     | 0.80           |

- Cell line: MCF7(2000cells/per well|96-well plate)
- Treated time: 72hrs
- Assay: alamarBlue(4hrs incubated) N=3

3g

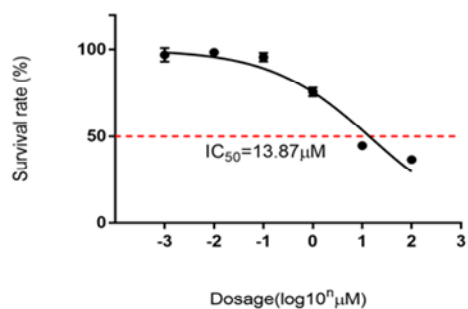

| Conc.(μM) | Viability |      |
|-----------|-----------|------|
|           | AVE.      | ±SD  |
| 0         | 100.00    | 3.81 |
| 0.01      | 98.47     | 1.22 |
| 0.1       | 95.72     | 2.40 |
| 1         | 75.82     | 2.54 |
| 10        | 44.77     | 2.26 |
| 100       | 36.87     | 2.04 |

3h

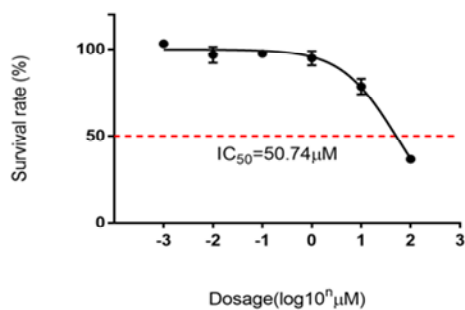

| Conc.(μM) | Viability |      |
|-----------|-----------|------|
|           | AVE.      | ±SD  |
| 0         | 100.00    | 2.21 |
| 0.01      | 96.84     | 4.58 |
| 0.1       | 97.52     | 1.24 |
| 1         | 94.95     | 4.06 |
| 10        | 78.76     | 4.46 |
| 100       | 36.73     | 1.30 |

3j

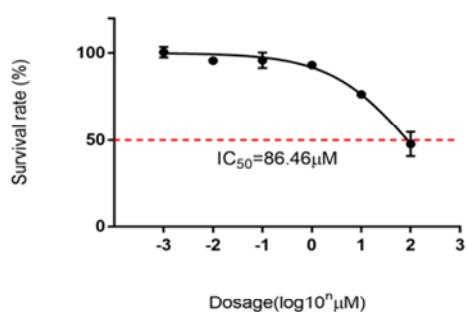

| Conc.(μM) | Viability |      |
|-----------|-----------|------|
|           | AVE.      | ±SD  |
| 0         | 100.00    | 3.03 |
| 0.01      | 95.66     | 1.14 |
| 0.1       | 95.82     | 4.39 |
| 1         | 93.15     | 1.66 |
| 10        | 76.31     | 0.98 |
| 100       | 47.83     | 6.86 |

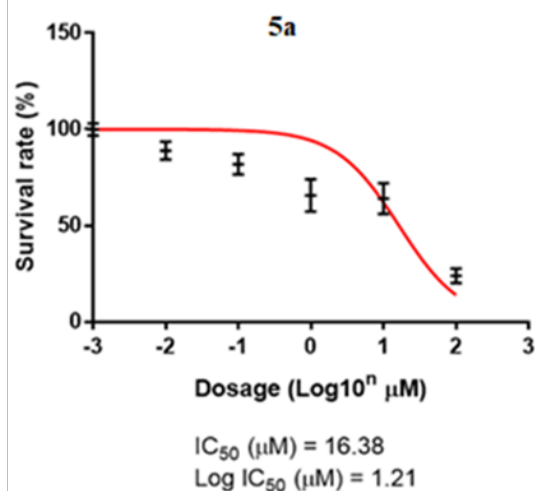

- Cell line: MCF7 (2000 cells/per well<sup>96</sup>)
- Treated time: 72hrs
- Assay: MTT (90mins incubated)

| Conc. ( $\mu\text{M}$ ) | Viability |           |
|-------------------------|-----------|-----------|
|                         | AVE.      | $\pm$ SD. |
| 0                       | 100.00    | 3.24      |
| 0.01                    | 88.99     | 4.69      |
| 0.1                     | 81.77     | 5.28      |
| 1                       | 65.64     | 8.43      |
| 10                      | 64.11     | 8.07      |
| 100                     | 23.90     | 3.79      |

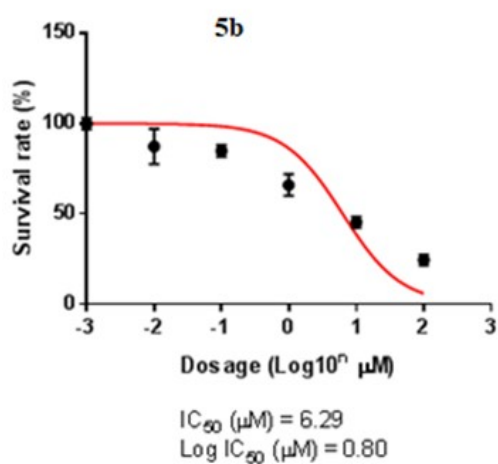

- Cell line: MCF7 (2000 cells/per well<sup>96</sup>)
- Treated time: 72hrs
- Assay: MTT (90mins incubated)

| Conc. ( $\mu\text{M}$ ) | Viability |           |
|-------------------------|-----------|-----------|
|                         | AVE.      | $\pm$ SD. |
| 0                       | 100.00    | 3.24      |
| 0.01                    | 87.34     | 9.78      |
| 0.1                     | 84.81     | 3.29      |
| 1                       | 65.95     | 6.08      |
| 10                      | 45.36     | 3.18      |
| 100                     | 24.47     | 3.01      |

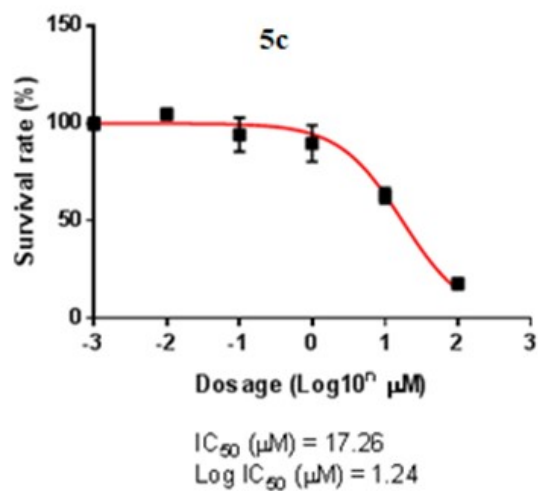

- Cell line: MCF7 (2000 cells/per well<sup>96</sup>)
- Treated time: 72hrs
- Assay: MTT (90mins incubated)

| Conc. ( $\mu\text{M}$ ) | Viability |           |
|-------------------------|-----------|-----------|
|                         | AVE.      | $\pm$ SD. |
| 0                       | 100.00    | 3.24      |
| 0.01                    | 104.74    | 2.95      |
| 0.1                     | 94.25     | 8.87      |
| 1                       | 89.71     | 9.39      |
| 10                      | 62.88     | 4.10      |
| 100                     | 17.74     | 0.85      |

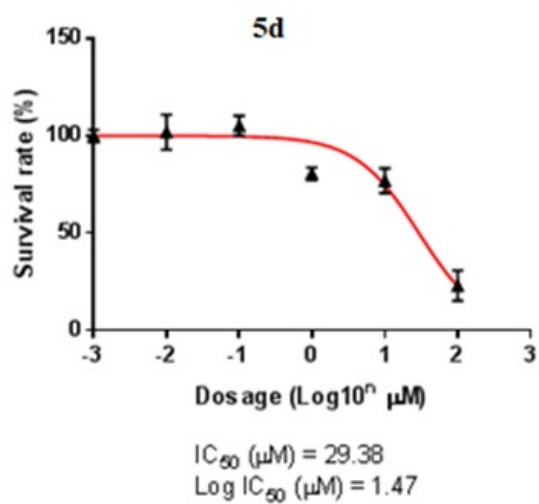

- Cell line: MCF7 (2000 cells/per well<sup>96</sup>)
- Treated time: 72hrs
- Assay: MTT (90mins incubated)

| Conc. ( $\mu\text{M}$ ) | Viability |           |
|-------------------------|-----------|-----------|
|                         | AVE.      | $\pm$ SD. |
| 0                       | 100.00    | 3.24      |
| 0.01                    | 101.90    | 9.09      |
| 0.1                     | 105.19    | 5.08      |
| 1                       | 80.57     | 3.12      |
| 10                      | 76.95     | 6.40      |
| 100                     | 23.00     | 7.76      |

- Cell line: MCF7(2000cells/per well|96-well plate)
- Treated time: 72hrs
- Assay: alamarBlue(4hrs incubated) N=3

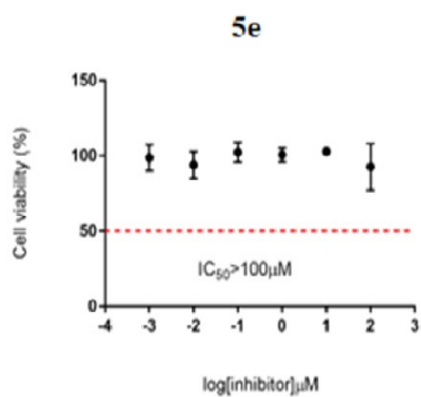

| Conc.( $\mu\text{M}$ ) | Viability (%) |          |
|------------------------|---------------|----------|
|                        | AVE.          | $\pm$ SD |
| 0                      | 100.0         | 8.7      |
| 0.01                   | 94.1          | 8.9      |
| 0.1                    | 102.5         | 6.5      |
| 1                      | 100.7         | 4.6      |
| 10                     | 103.0         | 2.3      |
| 100                    | 92.9          | 15.5     |

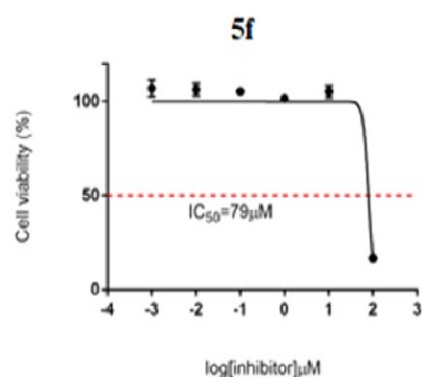

| Conc.( $\mu\text{M}$ ) | Viability (%) |          |
|------------------------|---------------|----------|
|                        | AVE.          | $\pm$ SD |
| 0                      | 100.0         | 4.3      |
| 0.01                   | 106.3         | 3.3      |
| 0.1                    | 105.4         | 2.3      |
| 1                      | 101.6         | 2.3      |
| 10                     | 105.2         | 3.2      |
| 100                    | 16.7          | 2.0      |

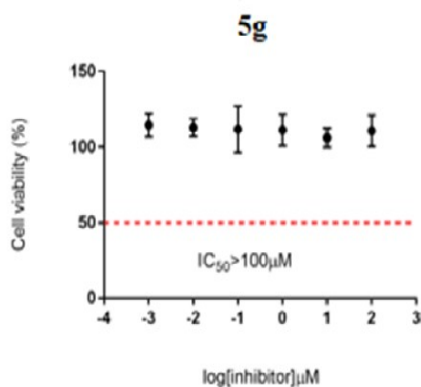

| Conc.( $\mu\text{M}$ ) | Viability (%) |          |
|------------------------|---------------|----------|
|                        | AVE.          | $\pm$ SD |
| 0                      | 100.0         | 7.7      |
| 0.01                   | 113.0         | 5.8      |
| 0.1                    | 111.8         | 15.3     |
| 1                      | 111.4         | 10.4     |
| 10                     | 106.2         | 6.4      |
| 100                    | 110.8         | 10.4     |

- Cell line: MCF7 (2000 cells/per well<sup>98</sup>)
- Treated time: 72hrs
- Assay: MTT (4 hrs incubated)

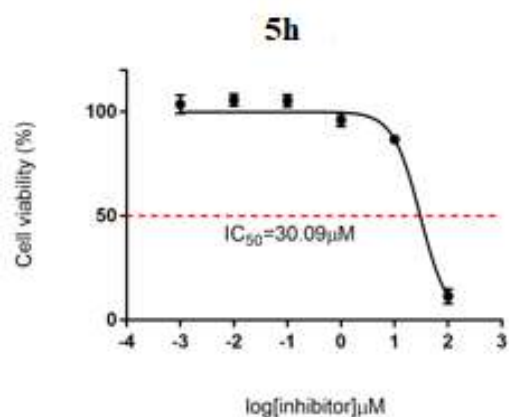

| Conc. ( $\mu\text{M}$ ) | Viability (%) |                |
|-------------------------|---------------|----------------|
|                         | AVE.          | $\pm\text{SD}$ |
| 0                       | 100.0         | 4.4            |
| 0.01                    | 105.8         | 2.9            |
| 0.1                     | 105.4         | 2.9            |
| 1                       | 96.2          | 3.1            |
| 10                      | 86.8          | 0.8            |
| 100                     | 11.4          | 3.6            |

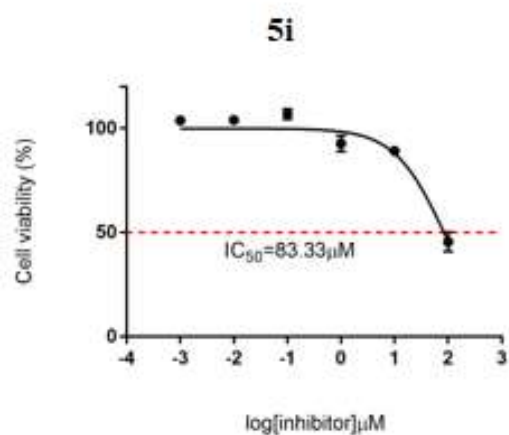

| Conc. ( $\mu\text{M}$ ) | Viability (%) |                |
|-------------------------|---------------|----------------|
|                         | AVE.          | $\pm\text{SD}$ |
| 0                       | 100.0         | 1.4            |
| 0.01                    | 104.0         | 1.2            |
| 0.1                     | 106.9         | 2.4            |
| 1                       | 92.7          | 3.8            |
| 10                      | 89.2          | 2.2            |
| 100                     | 45.5          | 4.8            |

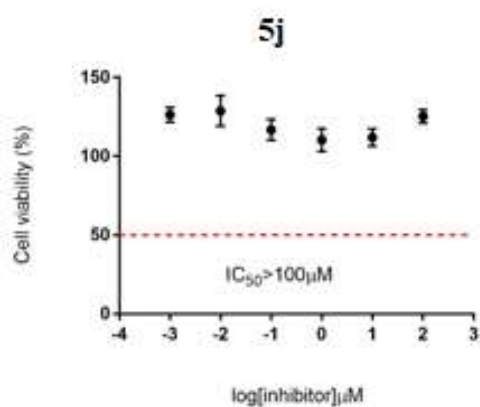

| Conc. ( $\mu\text{M}$ ) | Viability (%) |                |
|-------------------------|---------------|----------------|
|                         | AVE.          | $\pm\text{SD}$ |
| 0                       | 100.0         | 4.8            |
| 0.01                    | 128.8         | 9.7            |
| 0.1                     | 116.8         | 6.7            |
| 1                       | 110.3         | 7.3            |
| 10                      | 111.9         | 5.6            |
| 100                     | 125.3         | 4.3            |

- Cell line: MCF7 (2000 cells/per well<sup>98</sup>)
- Treated time: 72hrs
- Assay: MTT (4 hrs incubated)

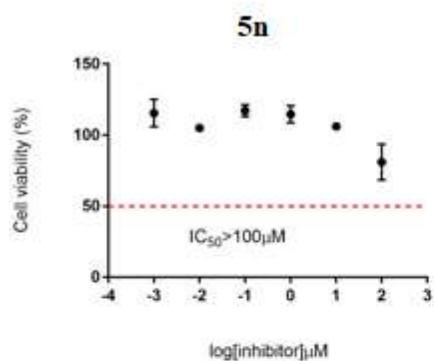

| Conc. ( $\mu\text{M}$ ) | Viability (%) |                 |
|-------------------------|---------------|-----------------|
|                         | AVE.          | $\pm \text{SD}$ |
| 0                       | 100.0         | 9.6             |
| 0.01                    | 105.0         | 0.5             |
| 0.1                     | 117.3         | 4.1             |
| 1                       | 114.7         | 6.1             |
| 10                      | 106.2         | 2.9             |
| 100                     | 81.1          | 12.7            |

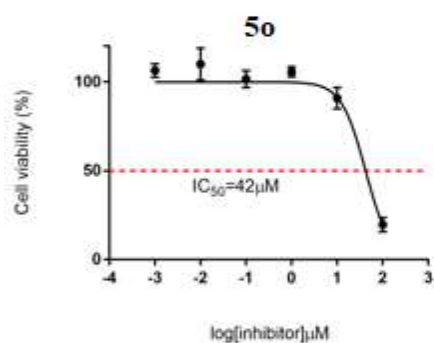

| Conc. ( $\mu\text{M}$ ) | Viability (%) |                 |
|-------------------------|---------------|-----------------|
|                         | AVE.          | $\pm \text{SD}$ |
| 0                       | 100.0         | 3.7             |
| 0.01                    | 110.1         | 8.9             |
| 0.1                     | 101.6         | 4.8             |
| 1                       | 105.7         | 2.8             |
| 10                      | 90.8          | 6.1             |
| 100                     | 19.7          | 4.0             |

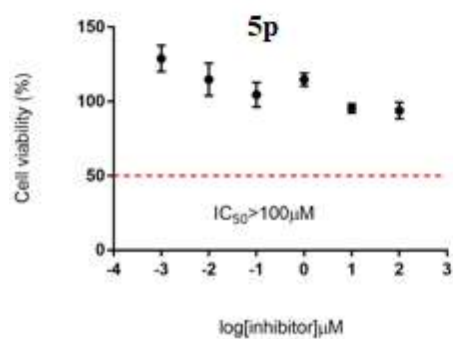

| Conc. ( $\mu\text{M}$ ) | Viability (%) |                 |
|-------------------------|---------------|-----------------|
|                         | AVE.          | $\pm \text{SD}$ |
| 0                       | 100.0         | 8.8             |
| 0.01                    | 114.8         | 10.9            |
| 0.1                     | 104.6         | 8.3             |
| 1                       | 114.7         | 4.3             |
| 10                      | 95.4          | 3.0             |
| 100                     | 93.9          | 5.5             |

## IC<sub>50</sub> of **3a** against MDA-MB-231, BT-549, SUM159PT

➤ Cell line: TNBC :MDAMB231;BT-549;SUM159PT (2000cells/per well96-well plate)

➤ Treated time: 72hrs

➤ Assay: alamarBlue (4hrs incubated)

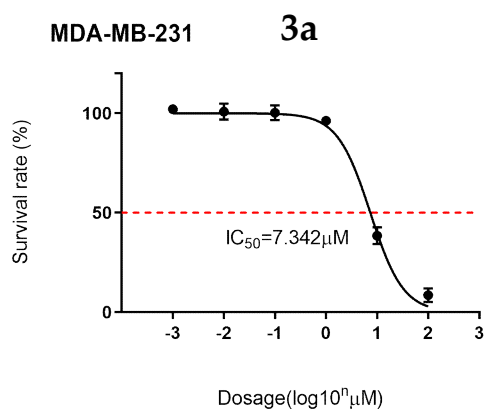

| Conc.(μM) | Viability |     |
|-----------|-----------|-----|
|           | AVE.      | ±SD |
| 0         | 100.0     | 1.1 |
| 0.01      | 100.8     | 4.1 |
| 0.1       | 100.3     | 3.8 |
| 1         | 96.3      | 1.1 |
| 10        | 38.4      | 4.2 |
| 100       | 8.6       | 3.4 |

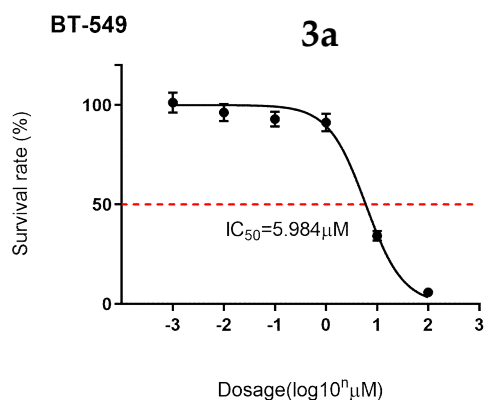

| Conc.(μM) | Viability |     |
|-----------|-----------|-----|
|           | AVE.      | ±SD |
| 0         | 100.0     | 5.0 |
| 0.01      | 96.3      | 4.3 |
| 0.1       | 92.9      | 3.7 |
| 1         | 91.3      | 4.4 |
| 10        | 34.2      | 2.5 |
| 100       | 5.8       | 2.2 |

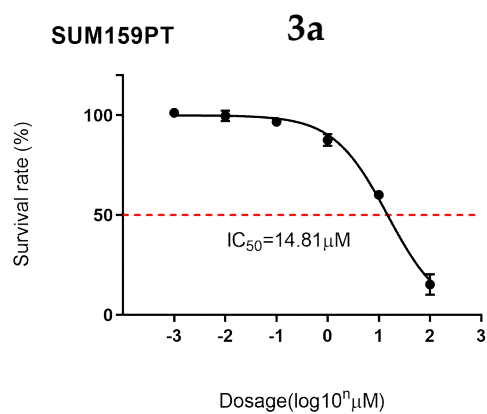

| Conc.(μM) | Viability |     |
|-----------|-----------|-----|
|           | AVE.      | ±SD |
| 0         | 100.0     | 1.6 |
| 0.01      | 99.7      | 2.6 |
| 0.1       | 96.8      | 1.4 |
| 1         | 87.6      | 2.9 |
| 10        | 60.2      | 2.0 |
| 100       | 15.2      | 5.1 |

## IC<sub>50</sub> of **5b** against MDA-MB-231, BT-549, SUM159PT

➤ Cell line: TNBC :MDAMB231;BT-549;SUM159PT (2000cells/per well96-well plate)

➤ Treated time: 72hrs

➤ Assay: alamarBlue (4hrs incubated)

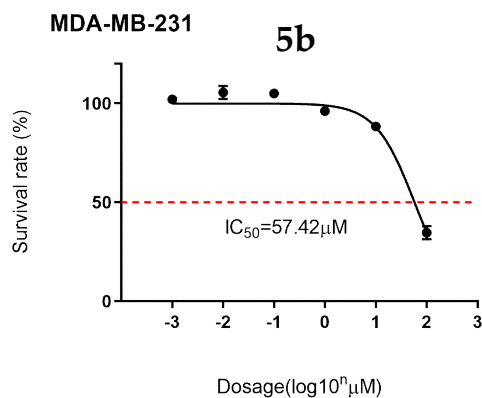

| Conc.(μM) | Viability |     |
|-----------|-----------|-----|
|           | AVE.      | ±SD |
| 0         | 100.0     | 1.8 |
| 0.01      | 105.6     | 3.3 |
| 0.1       | 105.1     | 1.3 |
| 1         | 96.1      | 0.7 |
| 10        | 88.3      | 1.2 |
| 100       | 34.7      | 3.3 |

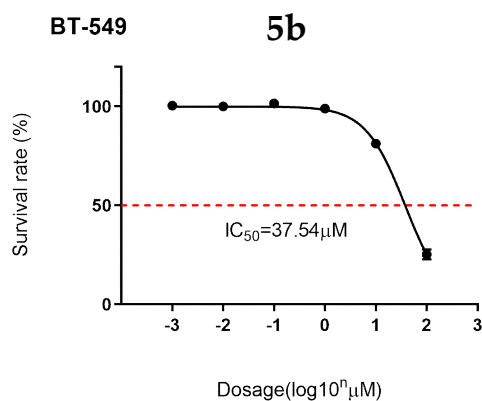

| Conc.(μM) | Viability |     |
|-----------|-----------|-----|
|           | AVE.      | ±SD |
| 0         | 100.0     | 0.4 |
| 0.01      | 100.0     | 1.0 |
| 0.1       | 101.6     | 1.7 |
| 1         | 98.9      | 1.2 |
| 10        | 81.2      | 1.6 |
| 100       |           | 2.6 |

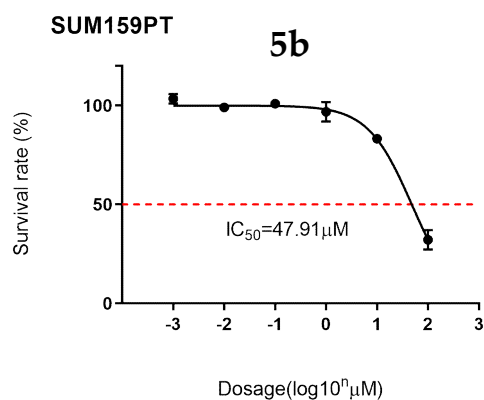

| Conc.(μM) | Viability |     |
|-----------|-----------|-----|
|           | AVE.      | ±SD |
| 0         | 100.0     | 2.5 |
| 0.01      | 99.0      | 2.2 |
| 0.1       | 101.0     | 1.4 |
| 1         | 96.9      | 4.9 |
| 10        | 83.2      | 2.4 |
| 100       | 32.2      | 4.9 |

- Cell line: MCF7 (100000cells/per 6cm dish)
- Treated time: 24hrs
- Assay: Western blot
- Antibody:

|                       |                       |
|-----------------------|-----------------------|
| Phospho-NFKBp65(S536) | Cell Signaling 30333S |
| NFKBp65               | Cell Signaling 8242S  |
| β-ACTIN               | Santa Cruzsc-47778    |

Protein Ladder: 4A biotech MPM9207

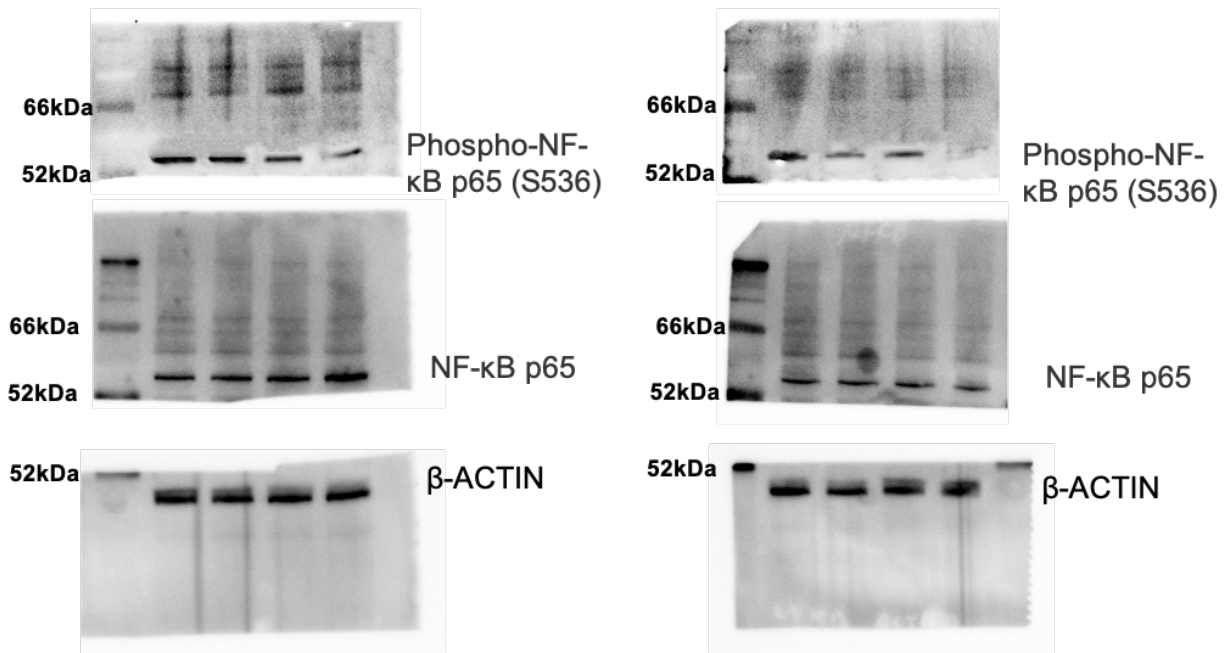

Supplement: s1 [file s1]
